# Supplementary material
Source: PubMed Central journal article supplement (PMC7116526)
Supplement: EMS108209-supplement-Supp_Info.pdf [file EMS108209-supplement-Supp_Info.pdf]

## **Supplementary Information**

<sup>1</sup>Medical Research Council Laboratory of Molecular Biology, Francis Crick Avenue,  
Cambridge, England, UK

Daniel L. Dunkelmann<sup>1,2</sup>, Julian C. W. Willis<sup>1,2</sup>, Jason W. Chin<sup>1,\*</sup>

<sup>1</sup>Medical Research Council Laboratory of Molecular Biology, Francis Crick Avenue,  
Cambridge, England, UK

<sup>2</sup>These authors contributed equally.

\*Correspondence: chin@mrc-lmb.cam.ac.uk

|                                                                                                                                                               |          |
|---------------------------------------------------------------------------------------------------------------------------------------------------------------|----------|
| <b>SUPPLEMENTARY INFORMATION.....</b>                                                                                                                         | <b>1</b> |
| METHODS.....                                                                                                                                                  | 4        |
| <i>Identification of <math>\Delta</math>NPylRS sequences.....</i>                                                                                             | 4        |
| <i>Identification of <sup>Pyl</sup>tRNA sequences.....</i>                                                                                                    | 4        |
| <i>DNA constructs.....</i>                                                                                                                                    | 4        |
| <i>Library Generation.....</i>                                                                                                                                | 6        |
| <i>Selection to identify orthogonal Class A <math>\Delta</math>NPyltRNAs.....</i>                                                                             | 6        |
| <i>Measuring the activity and specificity of PylRS/<sup>Pyl</sup>tRNA<sub>CUA</sub> pairs with synthetase and tRNA expressed from different plasmids.....</i> | 8        |
| <i>Measuring the activity and specificity of PylRS/<sup>Pyl</sup>tRNA<sub>CUA</sub> pairs with synthetase and tRNA expressed from the same plasmid.....</i>   | 9        |
| <i>GFP(TAG)<sub>His6</sub> Expression for Mass Spectrometry.....</i>                                                                                          | 9        |
| <i>O-GST-CAM(1XXX)<sub>His6</sub> Expression for SDS PAGE.....</i>                                                                                            | 10       |
| <i>O-StrepGFP(40TAG, 136AGGA, 150AGTA)<sub>His6</sub> Expression for Western Blot Analysis and Mass Spectrometry.....</i>                                     | 11       |
| <i>Electrospray ionization mass spectrometry.....</i>                                                                                                         | 12       |
| SUPPLEMENTARY FIGURES.....                                                                                                                                    | 13       |
| <i>Supplementary Figure 1.....</i>                                                                                                                            | 13       |
| <i>Supplementary Figure 2.....</i>                                                                                                                            | 15       |
| <i>Supplementary Figure 3.....</i>                                                                                                                            | 16       |
| <i>Supplementary Figure 4.....</i>                                                                                                                            | 17       |
| <i>Supplementary Figure 5.....</i>                                                                                                                            | 18       |
| <i>Supplementary Figure 6.....</i>                                                                                                                            | 20       |
| <i>Supplementary Figure 7.....</i>                                                                                                                            | 21       |
| <i>Supplementary Figure 8.....</i>                                                                                                                            | 22       |
| <i>Supplementary Figure 9.....</i>                                                                                                                            | 23       |
| <i>Supplementary Figure 10.....</i>                                                                                                                           | 25       |
| <i>Supplementary Figure 11.....</i>                                                                                                                           | 27       |
| <i>Supplementary Figure 12.....</i>                                                                                                                           | 28       |
| <i>Supplementary Figure 13.....</i>                                                                                                                           | 30       |
| <i>Supplementary Figure 14.....</i>                                                                                                                           | 31       |
| <i>Supplementary Figure 15.....</i>                                                                                                                           | 32       |
| <i>Supplementary Figure 16.....</i>                                                                                                                           | 34       |
| <i>Supplementary Figure 17.....</i>                                                                                                                           | 36       |
| <i>Supplementary Figure 18.....</i>                                                                                                                           | 38       |
| <i>Supplementary Figure 19.....</i>                                                                                                                           | 40       |
| <i>Supplementary Figure 20.....</i>                                                                                                                           | 41       |
| SUPPLEMENTARY TABLES.....                                                                                                                                     | 42       |
| <i>Supplementary Table 1.....</i>                                                                                                                             | 42       |
| <i>Supplementary Table 2.....</i>                                                                                                                             | 43       |
| <i>Supplementary Table 3.....</i>                                                                                                                             | 47       |
| <i>Supplementary Table 4.....</i>                                                                                                                             | 48       |
| <i>Supplementary Table 5.....</i>                                                                                                                             | 49       |
| <i>Supplementary Table 6.....</i>                                                                                                                             | 50       |
| <i>Supplementary Table 7.....</i>                                                                                                                             | 51       |
| <i>Supplementary Table 8.....</i>                                                                                                                             | 52       |
| <i>Supplementary Table 9.....</i>                                                                                                                             | 53       |
| <i>Supplementary Table 10.....</i>                                                                                                                            | 54       |
| <i>Supplementary Table 11.....</i>                                                                                                                            | 54       |
| PLASMIDS.....                                                                                                                                                 | 55       |
| <i>pKW1 AlvPylRS Alv<math>\Delta</math>NPyltRNA.....</i>                                                                                                      | 55       |
| <i>pKW1 AlvPylRS Alv<math>\Delta</math>NPyltRNA.....</i>                                                                                                      | 56       |
| <i>pBAD GFP(150TAG)<sub>His6</sub>.....</i>                                                                                                                   | 58       |
| <i>pBAD AlvPylRS CAT(111TAG) GFP(150TAG)<sub>His6</sub>.....</i>                                                                                              | 61       |

*pKW1 TRIPLE*..... 64  
*pCUN\_O-Strep-sfGFP-40TAG-136AGGA-150AGTA*..... 66  
*pCUN\_O-GST-CAM(1TAG)*..... 68  
*pRSF\_D11-riboX-G9*..... 70  
*Data availability statement*..... 75  
*References*..... 75

## Methods

### Identification of $\Delta$ NPylRS sequences

We identified PylRS protein sequences homologous to the C-terminal region of *MmPylRS* or to *Desulfitobacterium hafniense* (*Dh*) PylSn by protein HMMER search<sup>1</sup> against the UniProtKB database<sup>2</sup> using *MmPylRS*d184 or *DhPylSn* as the query sequence respectively and filtering for expect values below  $1 \times 10^{-30}$ . From the identified protein sequences, which contain homology to the C-terminal region of *MmPylRS*, we eliminated those for which sequence homology to *DhPylSn* could be found within the same genome. From the remaining protein sequences, which correspond to  $\Delta$ NPylRSs, we identified those that had not been previously reported.

### Identification of <sup>Pyl</sup>tRNA sequences

Using the NCBI Nucleotide Database we used existing genome annotations to identify the DNA sequence for each PylRS gene within its host genome, and were thus able to identify the genomic region corresponding to the pyrrolysine gene cluster. In the sequences 40 kb upstream and downstream of the PylRS gene,  $\Delta$ NPyl<sup>tRNA</sup> sequences were manually identified by searching for sequence similarity to known  $\Delta$ NPyl<sup>tRNA</sup> sequences; <sup>+NPyl</sup>tRNA sequences were manually identified by searching for sequence similarity to *Mm*<sup>Pyl</sup>tRNA. tRNA secondary structure prediction was initially performed using *RNA structure*<sup>3</sup> and manually curated by inspection and comparison to *Mm*<sup>Pyl</sup>tRNA.

### DNA constructs

PylRS and <sup>Pyl</sup>tRNA genes were synthesised by IDT as gBlock double-stranded DNA fragments. We cloned the genes into pKW vectors by Gibson assembly. PylRS was expressed from a *glmS* promoter and <sup>Pyl</sup>tRNA was expressed from an *lpp* promoter.

PylRS genes were coded for expression in *E. coli* using the *IDT Codon Optimization Tool*. We appended the gene for *MmPylRS* with a sequence encoding a C-terminal Ser(Gly<sub>4</sub>Ser)<sub>4</sub>FLAG-tag, while all other PylRS genes were appended with a sequence encoding a C-terminal Ser(Gly<sub>4</sub>Ser)<sub>4</sub>His<sub>6</sub>SerGlyStrep-tag II. We used these plasmids together with pBAD GFP(150TAG)His<sub>6</sub> (in which sfGFP containing an amber stop codon at position 150 and a C-terminal His<sub>6</sub> tag is expressed from the arabinose promoter of pBAD; GFP refers to sfGFP throughout). We used Gibson cloning to insert each PylRS cassette under constitutive expression from the *glnS* promoter into pBAD CAT(111TAG) GFP(150TAG)His<sub>6</sub> vectors, in which a chloramphenicol acetyl transferase gene containing an amber stop codon at position 111 is under constitutive expression.

To create the plasmid pKW1-Triple for triple ncAA incorporation, PylRS genes were designed to be expressed as a single polycistronic mRNA transcript under the control of the *glnS* promoter, with RBS binding strengths of approximately 10,000 RBS units rationally designed using the RBS Calculator (<https://www.denovodna.com/software/>)<sup>4-8</sup> specifying *Escherichia coli* K-12 as the host organism. tRNA genes were designed to be expressed as a single polycistronic mRNA transcript under the control of the *lpp* promoter. Sequences between tRNAs were designed by manual examination of the *E. coli* K-12 MG1655 genome using EcoCyc<sup>9</sup> and identifying spacer sequences between tRNAs from the same isoacceptor class which are expressed as adjacent tRNAs in the same operon. Spacer sequences originating between AlaX and AlaW, and ValU and ValX genes were selected for use. Cassettes containing PylRS and PyltRNA genes were

synthesised by IDT as gBlock double-stranded DNA fragments. We cloned the genes into pKW vectors by Gibson assembly.

### **Library Generation**

Libraries of *Int*<sup>ΔNPyl</sup>tRNA with randomised variable loop or acceptor stem sequences were constructed by Golden Gate cloning from a pKW *Int*<sup>ΔNPyl</sup>tRNA vector using PCR primers listed in **Supplementary Table 11** together with restriction enzyme BbsI and T4 DNA ligase.

We transformed each library separately into competent *E. coli* DH10B cells to give library diversities of more than  $1 \times 10^8$ , exceeding the theoretical diversity of  $6 \times 10^7$  required for complete library coverage.

### **Selection to identify orthogonal Class A <sup>ΔNPyl</sup>tRNAs**

For the variable loop library, we transformed each *Int*<sup>ΔNPyl</sup>tRNA variable loop library into competent *E. coli* DH10B cells bearing pBAD *IntPylRS* CAT(111TAG) GFP(150TAG)His<sub>6</sub>. We recovered the transformed cells for 1 h at 37°C in 0.5 mL SOB medium supplemented with 8 mM BockK. The transformation was plated on LB agar containing 37.5 μg/mL spectinomycin, 12.5 μg/mL tetracycline and 100 μg/mL chloramphenicol. The plates were incubated at 37 °C for 40 h. After incubation, colonies on the plates were washed off and collected in 2XTY buffer and the plasmids were extracted by DNA midiprep (Qiagen kit). To remove the pBAD *IntPylRS* CAT(111TAG) GFP(150TAG)His<sub>6</sub> plasmid, the extracted DNA was digested with both NcoI restriction endonuclease and T5 exonuclease and re-purified using a PCR purification column. The

remaining pKW plasmids were transformed into competent *E. coli* DH10B cells bearing either pBAD *AlvPylRS* CAT(111TAG) GFP(150TAG)His<sub>6</sub> or pBAD *MmPylRS* CAT(111TAG) GFP(150TAG)His<sub>6</sub>. The transformed cells were recovered for 1 h at 37°C in 0.5 mL SOB medium. The transformation was plated on LB agar containing 37.5 µg /mL spectinomycin and 12.5 µg /mL tetracycline. The plates were incubated at 37°C for 20 h. For each library, 1,528 colonies were picked from the plates using a QPix 420 Colony Picking System and inoculated into 190 µl 2XTY-STA (2XTY medium with 75 µg/mL spectinomycin, 25 µg/mL tetracycline and 0.5% *L*-arabinose) in 96-well microtitre plate format supplemented with 8 mM BockK. The plates were incubated at 37°C and 220 rpm, and OD<sub>600</sub> and GFP fluorescence ( $\lambda_{\text{ex}}$  485 nm,  $\lambda_{\text{em}}$  520 nm) measurements were recorded after 20 h using a SpectraMax i3. Cells from wells with the lowest GFP/OD<sub>600</sub> ratios were used to inoculate 2XTY medium with 75 µg/mL spectinomycin, and the pKW plasmids containing *Int*<sup>ΔNPyl</sup>tRNA variants were extracted by DNA miniprep and then sequenced. Each hit corresponding to a distinct *Int*<sup>ΔNPyl</sup>tRNA sequence was cloned into a pKW *IntPylRS* vector, a pKW *AlvPylRS* vector, and a pKW *MmPylRS* vector and re-phenotyped with pBAD GFP(150TAG)His<sub>6</sub>.

For the acceptor stem library, we transformed each *Int*<sup>ΔNPyl</sup>tRNA acceptor stem library into competent *E. coli* DH10B cells bearing pBAD *IntPylRS* CAT(111TAG) GFP(150TAG)His<sub>6</sub>. We recovered the transformed cells for 1 h at 37°C in 5 mL super optimal broth with catabolite repression (SOC) medium supplemented with 8 mM BockK. The transformation was plated on LB agar containing 75 µg/mL spectinomycin, 25 µg/mL tetracycline and 100 µg/mL chloramphenicol. The plates were incubated at 37°C for 24 h. After incubation, 192 colonies were picked into 1.7 mL 2XTY-STA in a 96-well

microtiter plate format supplemented with 8 mM Bock and grown overnight. Plasmids from all fluorescent cultures were extracted by DNA miniprep (Qiagen) and the extracted DNA was digested with both NcoI restriction endonuclease and T5 exonuclease. 1  $\mu$ L of the digestion products was transformed into chemically competent *E. coli* DH10B cells bearing either pBAD *Alv*PyIRS CAT(111TAG) GFP(150TAG)His<sub>6</sub> or pBAD *Mm*PyIRS CAT(111TAG) GFP(150TAG)His<sub>6</sub> by heat shock. The transformed cells were recovered for 1 h at 37°C in 180  $\mu$ L ml SOC medium, and 10  $\mu$ L was used to inoculate 180  $\mu$ L 2XTY-STA in a 96-well microtiter plate format supplemented with 8 mM Bock and grown overnight. Cells from wells with the lowest GFP/OD<sub>600</sub> ratios were used to inoculate 2XTY medium with 75  $\mu$ g/mL spectinomycin, and the pKW plasmids containing *Int* <sup>$\Delta$ N<sup>PyI</sup></sup>tRNA variants were extracted by DNA miniprep and then sequenced. Each hit corresponding to a distinct *Int* <sup>$\Delta$ N<sup>PyI</sup></sup>tRNA sequence was cloned into a pKW *Int*PyIRS vector, a pKW *Alv*PyIRS vector, and a pKW *Mm*PyIRS vector and re-phenotyped with pBAD GFP(150TAG)His<sub>6</sub>.

**Measuring the activity and specificity of PyIRS/<sup>PyI</sup>tRNA<sub>CUA</sub> pairs with synthetase and tRNA expressed from different plasmids**

To measure the activity and specificity of cognate and non-cognate PyIRS/<sup>PyI</sup>tRNA combinations we transformed 0.4  $\mu$ L of pKW <sup>PyI</sup>tRNA plasmids into 8  $\mu$ L chemically competent *E. coli* DH10B cells bearing either pBAD GFP(150TAG)His<sub>6</sub> or pBAD PyIRS GFP(150TAG)His<sub>6</sub>. We recovered the transformed cells for 1 h at 37°C and 750 rpm in 180  $\mu$ L SOC medium in 96-well microtiter plate format. 10  $\mu$ L of the transformed cells was used to inoculate 180  $\mu$ L 2XTY-STA in 96-well microtiter plate format, supplemented with or without 8 mM Bock. OD<sub>600</sub> and GFP fluorescence ( $\lambda_{ex}$  485 nm,



$\lambda_{em}$  520 nm) measurements were recorded after 22-28 h incubation at 37°C and 700 rpm using a Tecan Infinite M200 Pro.

### **Measuring the activity and specificity of PylRS/<sup>Pyl</sup>tRNA<sub>CUA</sub> pairs with synthetase and tRNA expressed from the same plasmid**

The same procedure was followed as described above. However, for this expression system both PylRS and <sup>Pyl</sup>tRNA were encoded on the same pKW plasmid which was transformed into chemically competent *E. coli* DH10B cells bearing pBAD GFP(150TAG)His<sub>6</sub>. For GFP expression, 25  $\mu$ L of transformed cells was inoculated into 500  $\mu$ L 2XTY-STA in 96-well microtiter plate format, in the presence or absence of 8 mM BockK, or 2 mM CbzK or 8 mM NmH. Cells were grown for 22-28 h at 750 rpm and 37°C before OD<sub>600</sub> 180  $\mu$ L of each well were transferred to a 96 well plate and GFP fluorescence measurements were recorded as described above.

### **GFP(TAG)<sub>His6</sub> Expression for Mass Spectrometry**

To express GFP incorporating BockK for mass spectrometry analysis we transformed pKW PylRS/<sup>Pyl</sup>tRNA plasmids into competent *E. coli* DH10B cells bearing pBAD GFP(150TAG)His<sub>6</sub>. We recovered the transformed cells for 1 h at 37°C in 1 mL SOC medium. The transformation was used to inoculate 20 mL 2XTY-STA supplemented with 8 mM BockK and incubated overnight at 37°C and 220 rpm for 20 h.

20 ml culture was pelleted by centrifugation and washed with 2 mL PBS. The cell pellets were resuspended in 1 mL lysis buffer (1X BugBuster Protein Extraction Reagent supplemented with 1X complete protease inhibitor cocktail, 1 mg /mL lysozyme and 1 mg /mL DNase I) and lysed for 1 h at 25°C with head-over-tail circular rotation. The lysate was clarified by centrifugation (21,000 g, 30 min, 4°C). GFP was purified by its C-

terminal His<sub>6</sub> tag using 75 µL Ni-NTA agarose beads and left to bind for 30 min at room temperature. The beads were washed five times with 1 mL PBS supplemented with 10 mM imidazole and eluted in 40 µL PBS supplemented with 250 mM imidazole.

The same procedure was used to assess the active site orthogonality of *IR26*PyIRS(Cbz)/*Ma*PyItRNA(11)<sub>CUA</sub>, *LumI*PyIRS(NmH)/*Int*PyItRNA(<sup>A</sup>13,<sup>V</sup>C10)<sub>CUA</sub> or *Mm*PyIRS/*Spe*PyItRNA<sub>CUA</sub> but all three amino acids were added to the medium (8mM BocK, 2 mM CbzK, 8 mM NmH) simultaneously.

The eluting fraction was diluted and analysed by time of flight mass spectrometry.

### **O-GST-CaM(1XXX)<sub>His6</sub> Expression for SDS PAGE**

To express O-GST-CaM(1XXX) proteins (X=TAG, AGGA or AGTA) we co-transformed competent *E. coli* DH10B cells with pKW-Triple *Mm*PyIRS/*Spe*<sup>PyI</sup>tRNA<sub>CUA</sub>, *LumI*PyIRS(NmH)/*Int*<sup>ANPyI</sup>tRNA(<sup>A</sup>17,<sup>V</sup>C10)<sub>UCCU</sub> and *IR26*PyIRS(CbzK)/*Alv*<sup>ANPyI</sup>tRNA(8)<sub>UACU</sub>, pRSF ribo-Q1 and pCUN O-GST-CaM(1XXX). We recovered the transformed cells for 1 h at 37°C in 1 mL SOC medium. The transformation was used to inoculate 5 mL 2XTY-KST (2XTY medium with 25 µg mL<sup>-1</sup> kanamycin, 75 µg mL<sup>-1</sup> spectinomycin, and 12.5 µg mL<sup>-1</sup> tetracycline) and incubated overnight (37°C, 16 h, 220 rpm). 50 µL of the overnight culture was diluted in 5 mL 2XTY-KST containing a combination of the indicated ncAAs (8 mM BocK **1**, 8 mM NmH **2** and 2 mM CbzK **3**) or none of them and incubated at 37°C, 220 rpm. At OD<sub>600</sub> 0.6, 50 µL 1M IPTG was added to a final concentration of 1 mM. After 16 h incubation at 37°C, 220 rpm, the cultures were pelleted and washed with 800 µL PBS. The cell pellets were resuspended in 1 mL of lysis buffer (1X BugBuster Protein Extraction Reagent supplemented with 1X cOmplete protease inhibitor cocktail) and

lysed for 1 h at 25 °C with head over tail rotation. The lysate was clarified by centrifugation (21,000 g, 30 min, 4°C). GST-containing proteins from the lysate supernatant were left to bind to 60 µL

glutathione sepharose beads for 1 h at 25 °C. The beads were washed five times with 800 µL PBS before eluting in 60 µL 20 mM reduced glutathione in PBS pH 8. Samples were analysed on 4-12% Bis-Tris SDS-PAGE gels, visualised with InstantBlue Coomassie stain and imaged using a ChemiDoc Touch Imaging System.

### **O-StrepGFP(40TAG, 136AGGA, 150AGTA)<sub>His6</sub> Expression for Western Blot Analysis and Mass Spectrometry**

To express O-StrepGFP(40TAG, 136AGGA, 150AGTA or wt)<sub>His6</sub> we co-transformed competent *E. coli* DH10B cells with pKW-Triple *MmPylRS/Spe<sup>Pyl</sup>tRNA<sub>CUA</sub>*, *LumIPylRS(NmH)/Int<sup>ΔNPyl</sup>tRNA(<sup>A</sup>17,<sup>V</sup>C10)<sub>UCCU</sub>* and *IR26PylRS(CbzK)/Alv<sup>ΔNPyl</sup>tRNA(8)<sub>UACU</sub>*, pRSF ribo-Q1 and pCUN O-StrepGFP(40TAG, 136AGGA, 150AGTA)<sub>His6</sub>. We recovered the transformed cells for 1 h at 37°C in 1 mL SOC medium. The transformation was used to inoculate 20 mL 2XTY-KST and incubated overnight (37°C, 16 h, 220 rpm). 1 mL of the overnight culture was diluted in 50 mL 2XTY-KST containing a combination of the indicated ncAAs (8 mM BocK **1**, 8 mM NmH **2** and 2 mM CbzK **3**) or none of them and incubated at 37°C, 220 rpm. At OD<sub>600</sub> 0.6, 500 µL 1M IPTG was added to a final concentration of 1 mM. After 16 h incubation at 37°C, 220 rpm, the cultures were pelleted and washed with 5 mL PBS. The cell pellets were resuspended in 5 mL of lysis buffer (1X BugBuster Protein Extraction Reagent supplemented with 1X cComplete protease inhibitor cocktail) and lysed for 1 h at 25 °C with head over tail rotation. The lysate was clarified by centrifugation (21,000 g,

30 min, 4°C). GFP-containing proteins from the lysate supernatant were left to bind to 80  $\mu$ L

Ni-NTA beads for 1 h at 25 °C. The beads were washed five times with 800  $\mu$ L PBS containing 25 mM imidazole before eluting in 80  $\mu$ L PBS containing 250 mM imidazole. Samples were analysed by western blot using 4-12% Bis-Tris SDS-PAGE gels, primary antibody rabbit anti-Strep ab76949 (Abcam) and secondary antibody goat anti-rabbit IRDye 800CW (LI-COR).

To obtain the mass spectrum of O<sub>-Strep</sub>GFP(40TAG, 136AGGA, 150AGTA)<sub>His6</sub> we combined the purified protein fractions from three biological replicates expressed in the presence of all three ncAAs and incubated them overnight with 100  $\mu$ L StrepTactin sepharose beads. Beads were washed five times with 800  $\mu$ L PBS pH 8 and eluted three times in 100  $\mu$ L 10 mM desthiobiotin pH 8. Fractions were combined, concentrated and analysed by time of flight mass spectrometry.

### **Electrospray ionization mass spectrometry**

Denatured protein samples (~10 $\mu$ M) were subjected to LC-MS analysis. Briefly, proteins were separated on a C4 BEH 1.7 $\mu$ m, 1.0 x 100mm UPLC column (Waters, UK) using a modified nanoAcquity (Waters, UK) to deliver a flow of approximately 50  $\mu$ l/min. The column was developed over 20 minutes with a gradient of acetonitrile (2% v/v to 80% v/v) in 0.1% v/v formic acid. The analytical column outlet was directly interfaced via an electrospray ionisation source, with a hybrid quadrupole time-of-flight mass spectrometer (Xevo G2, Waters, UK). Data was acquired over a m/z range of 300–2000, in positive ion mode with a cone voltage of 30V. Scans were summed together manually and deconvoluted using MaxEnt1 (Masslynx, Waters, UK). The theoretical molecular weights

of proteins with ncAAs was calculated by first computing the theoretical molecular weight of wild-type protein using an online tool (<http://web.expasy.org/protparam/>) and then manually correcting for the theoretical molecular weight of ncAAs.

## Supplementary Figures

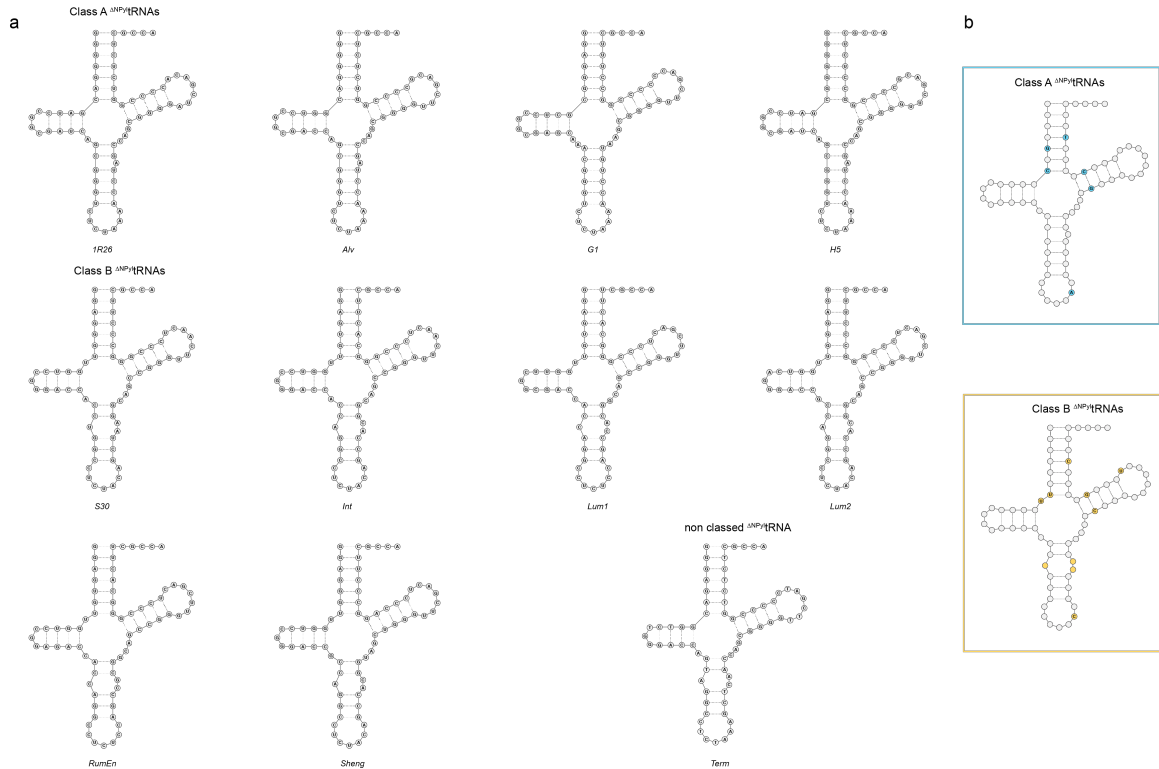

## Supplementary Figure 1

**a**, Predicted clover leaf structure of all  $\Delta N P y I$ tRNAs.  $\Delta N P y I$ tRNAs are grouped into Class A, Class B and non classed  $\Delta N P y I$ tRNAs. **b**, Predicted clover leaf structure with all nucleotides that are conserved within each class of  $\Delta N P y I$ tRNAs but differ between sequence Class A and sequence Class B  $\Delta N P y I$ tRNAs highlighted in blue (Class A) and yellow (Class B). Sequence Class A  $\Delta N P y I$ tRNAs (except *G1* and *Term*) were defined by a nucleotide bulge in the anticodon stem whereas sequence Class B  $\Delta N P y I$ tRNAs and

*Term*<sup>ΔNPyl</sup>tRNA instead exhibit a nucleotide loop at this location. Sequence Class B <sup>ΔNPyl</sup>tRNAs were also defined by the insertion of an additional uracil nucleotide between the acceptor stem and the D-stem. *GI*<sup>ΔNPyl</sup>tRNA uniquely harbors an additional adenine nucleotide between the D arm and the anticodon stem and has no bulge in the anticodon stem, which differentiates it from all other <sup>ΔNPyl</sup>tRNAs in this study.

Reference sequence (1): Lum1  
 Identities normalised by aligned length.  
 Colored by: identity

|                | cov    | pid    | 1 [ . . . . . : . . . ] 73                                             |
|----------------|--------|--------|------------------------------------------------------------------------|
| 1 Lum1         | 100.0% | 100.0% | GGAGGCTGGTCCGCGAGCCA--CCAGGCCCTACAGCCACGGCAGCCGGGTCGACCCCAGGGCACCGCCA  |
| 2 RumEn        | 100.0% | 95.8%  | GGAGGCTGGTCCGCGAGCCA--CCAGGCCCTACAGCCACGGCAGCCGGGTCGACCCCAGGGCACCGCCA  |
| 3 O30          | 98.6%  | 87.5%  | GGAGGCTGGTCCG--GGACCA--CCTGGCCCTACAGCTAAGCAGCCGGGTCGACCCCAGGGCACCGCCA  |
| 4 Int          | 98.6%  | 94.4%  | GGAGGCTGGTCCG--GGACCA--CCAGGCCCTACAGCCACGGCAGCCGGGTCGACCCCAGGGCACCGCCA |
| 5 Lum2         | 98.6%  | 90.3%  | GGAGGCTGGTCCG--GGACCG--CCAGGCCCTACAGCCACGGCAGCCGGGTCGACCCCAGGGCACCGCCA |
| 6 Sheng        | 98.6%  | 87.5%  | GGAGGCTGGTCCG--GGACCG--CCAGGCCCTACAGCCACGGTAGCTGGGTCGACCCCAGGGCACCGCCA |
| 7 G1           | 97.2%  | 68.1%  | -GGAGGGCTCCGGCGAGCAaCGGGTCTAAAACCT-GtaAGCGGGTCGACCCCAGGGCACCGCCA       |
| 8 Term         | 97.2%  | 66.2%  | -GGAGACGGTCTG--GGACCA--GTAGGCCCTAAAAGCTCAACAGCCGGGTCGATCCCCGGTCTCGCCA  |
| 9 Alv          | 98.6%  | 71.8%  | -GGGGACGGTCCGGCGACCA--GCGGGTCTAAAACCTAGCCAGCGGGTCGACGGCCCGGTCTCGCCA    |
| 10 H5          | 98.6%  | 70.4%  | -GGGGgCGATCCGGCGATCA--GCGGGTCTAAAACCTAGCCAGCGGGTCGACGGCCCGGTCTCGCCA    |
| 11 1R26        | 98.6%  | 67.6%  | -GGGGACGATCCGGCGATCA--GCGGGTCTAAAACCTAGCCAGCGGGTCGACACCCCGGTCTCGCCA    |
| consensus/100% |        |        | .GuuGssGstssG.sGAsCu.sssGgCtCAsAuCss.usSAGCsGGGTCuAsCCCsGGssssCGCCA    |
| consensus/90%  |        |        | .GuGssGuCsG.sGAsCu.sCuGgCtCAsAuCssGssSAGCsGGTCuAsCCCsGGssssCGCCA       |
| consensus/80%  |        |        | .GuGssGuCCC.sGAsCA.sCuGgCtCAsAuCCssGssSAGCsGGTCuAsCCCsGGssssCGCCA      |
| consensus/70%  |        |        | .GuGssGuCCG.sGACCA.sCuGgCtCAsAuCCssGssSAGCsGGTCuAsCCCsGGssssCGCCA      |

## Supplementary Figure 2

Sequence alignment of all <sup>ΔN<sup>Pyl</sup></sup>tRNA<sub>C<sup>U</sup>A<sup>S</sup></sub> generated with *Clustal Omega*.

Reference sequence (1): G1  
 Identities normalised by aligned length.  
 Colored by: identity

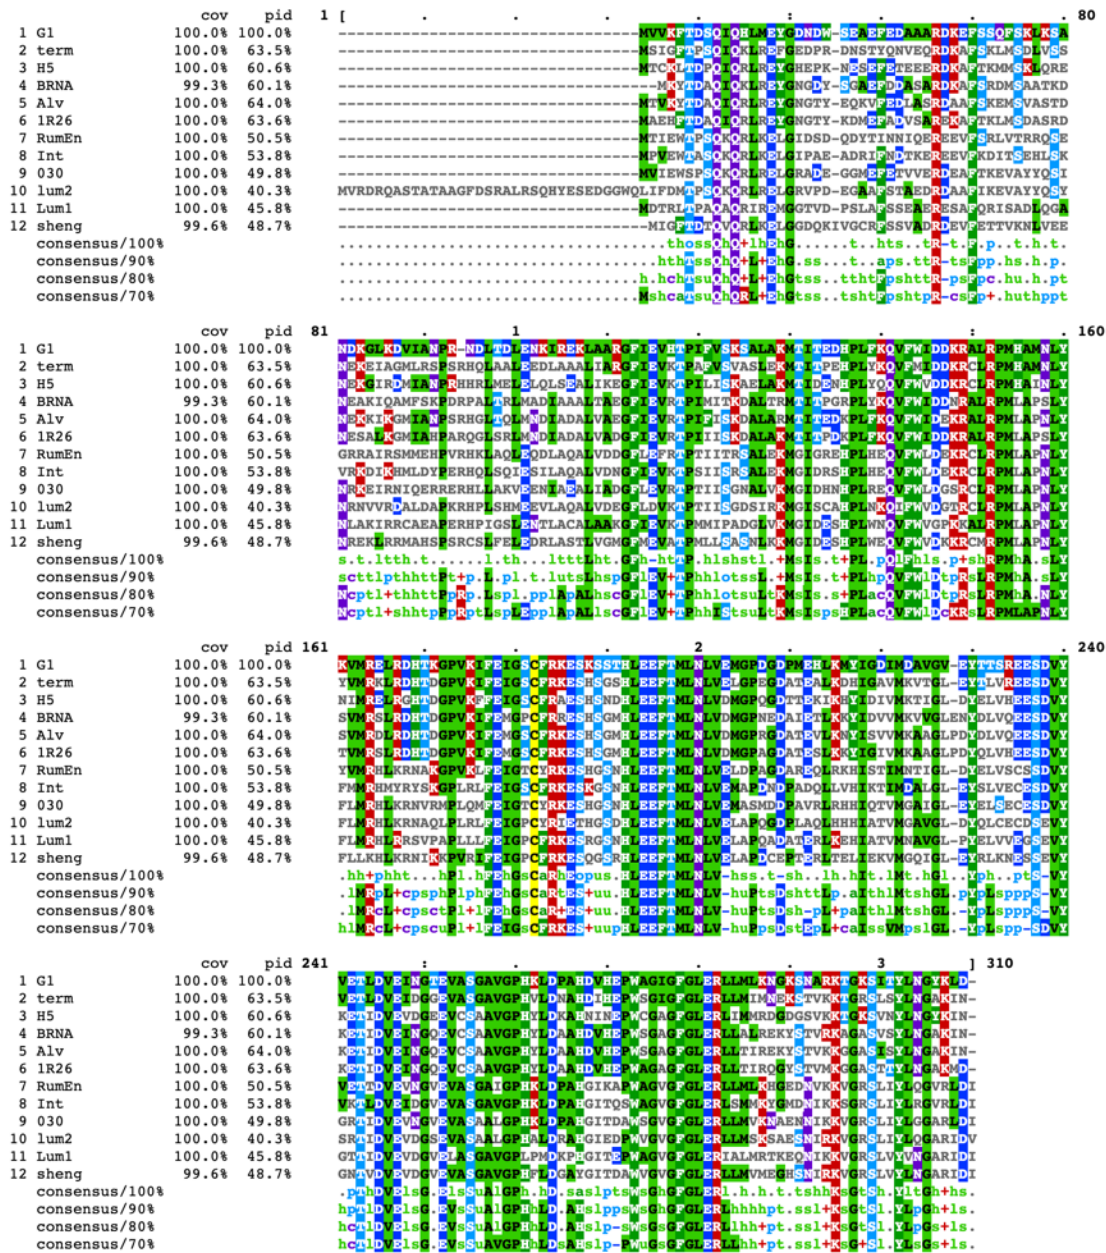

### Supplementary Figure 3

Sequence alignment of all ΔNPyIRs generated with *Clustal Omega*.



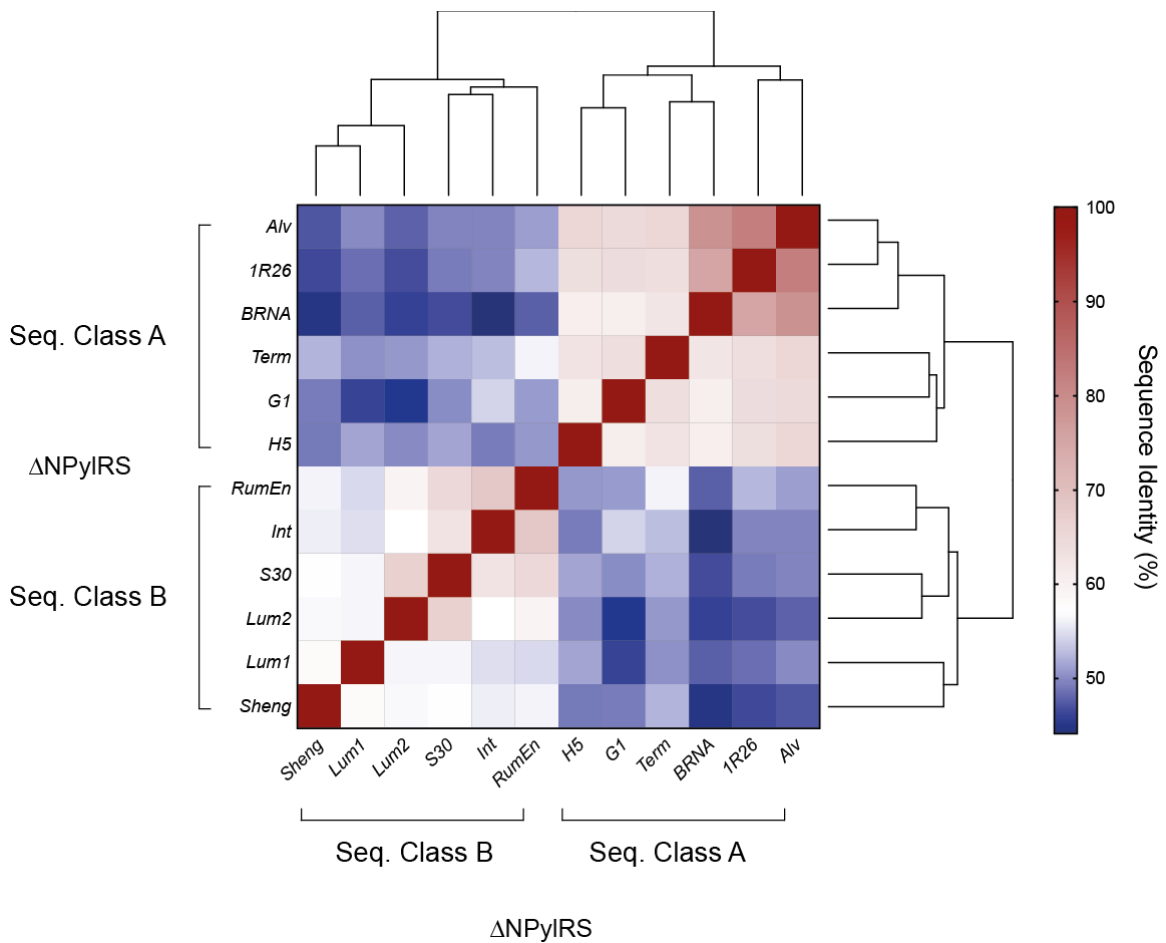

**Supplementary Figure 4**

Hierarchical clustering of  $\Delta$ NPyIRS with sequence similarity scores converted to Euclidean distance measures and complete linkage clustering in the program *R Studios*. Percentage sequence identity scores are displayed as a heatmap. The dendrograms resulting from the clustering demonstrate the grouping of the  $\Delta$ NPyIRSs in two sequence-dependent classes.

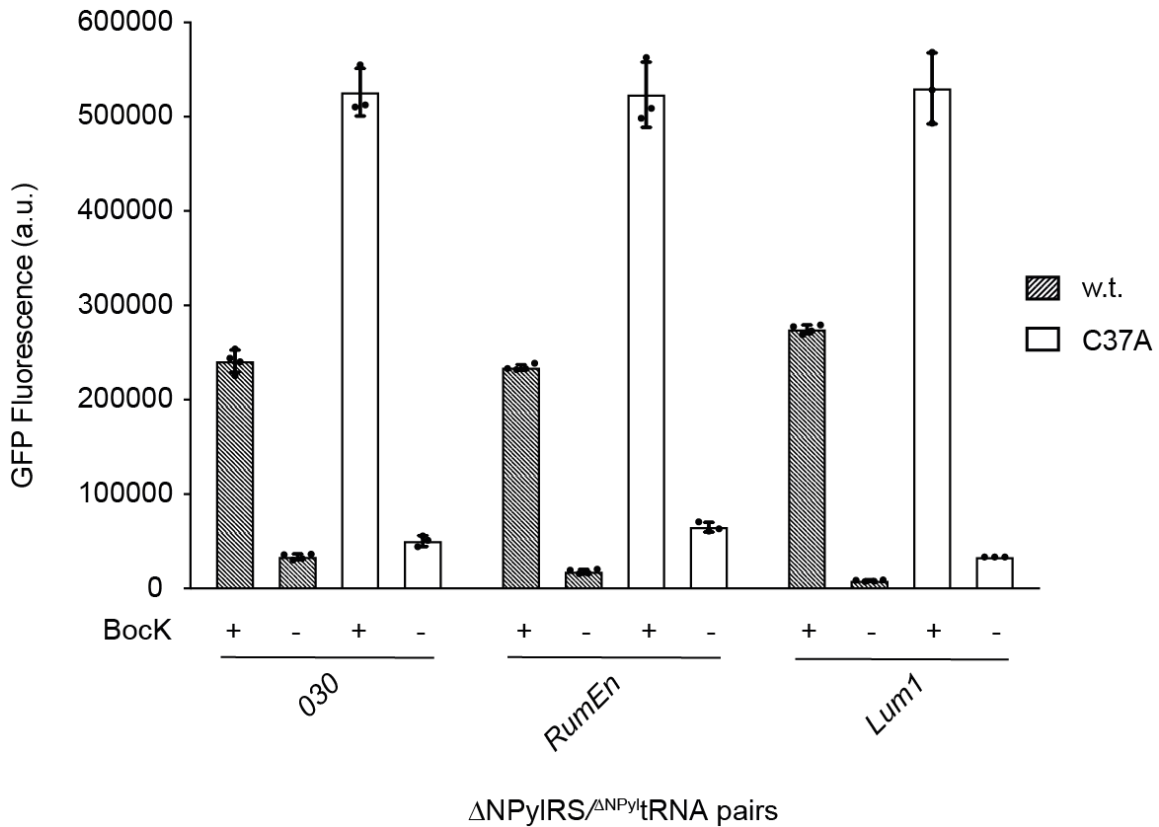

### Supplementary Figure 5

Comparison of Class B  $\Delta NPyIRS/\Delta NPyI tRNA_{CUA}$  pairs with each tRNA having either the wild type (w.t.) anticodon loop sequence or harbouring a C37A mutation. *In vivo* suppression activity was assayed in *E. coli* DH10B bearing pBAD GFP(150TAG)His<sub>6</sub>  $\Delta NPyIRS$  and pKW  $\Delta NPyI tRNA_{CUA}$  in the presence and absence of Bock. Each bar chart represents four (for wild type (w.t.) anticodon loop sequence  $\Delta NPyI tRNA_{CUA}$ ) or three (C37A mutation  $\Delta NPyI tRNA_{CUA}$ ) biological replicates with error bars showing std..

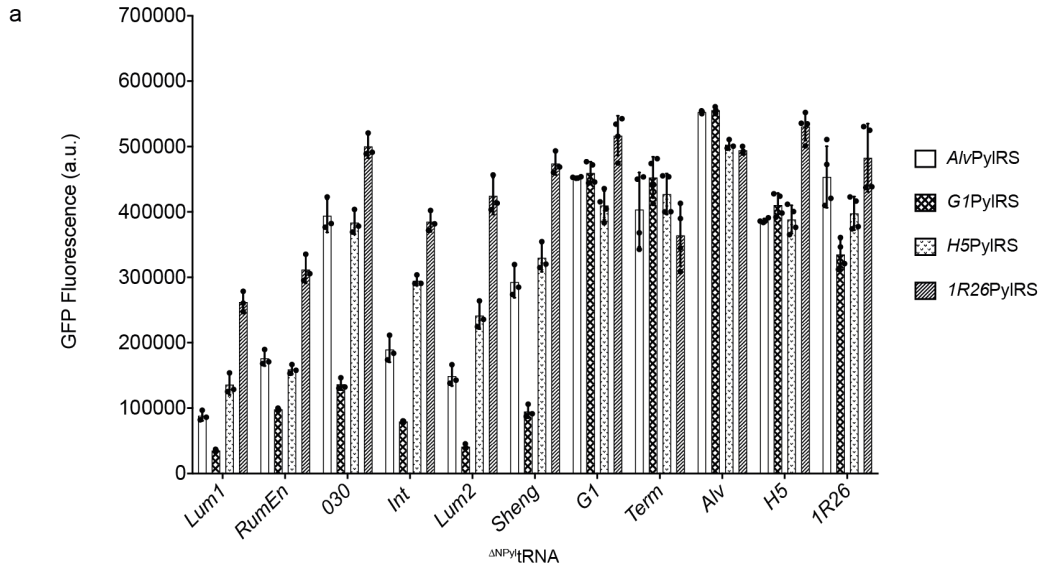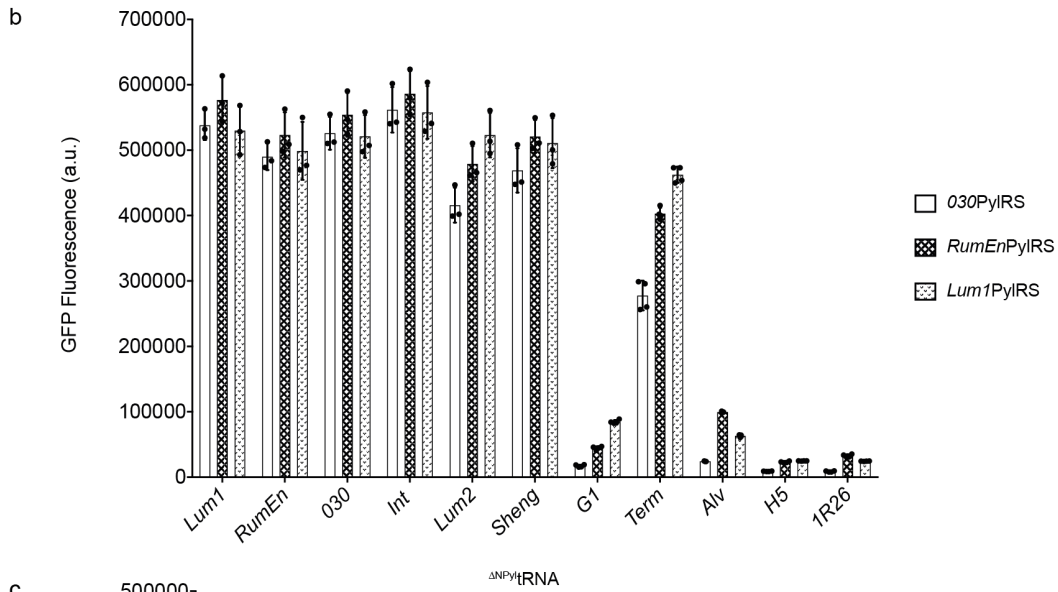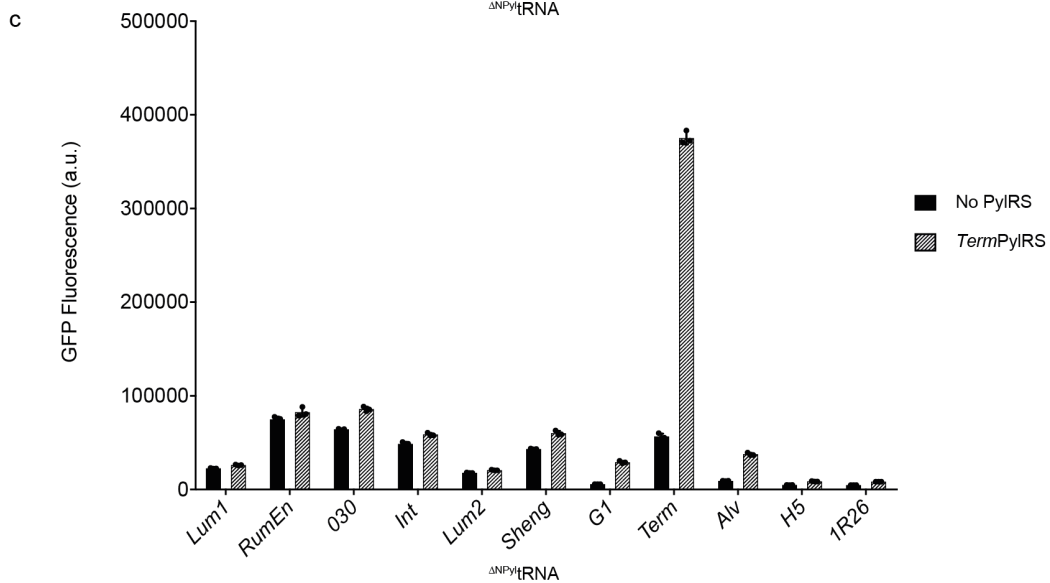

## Supplementary Figure 6

*In vivo* amber suppression activity of homologous and heterologous combinations of  $\Delta$ NPylRS/ $\Delta$ <sup>NPyl</sup>tRNA<sub>CUA</sub> pairs. *In vivo* suppression activity was assayed in *E. coli* DH10B bearing pBAD GFP(150TAG)His<sub>6</sub>  $\Delta$ NPylRS and pKW  $\Delta$ <sup>NPyl</sup>tRNA<sub>CUA</sub> in the presence of Bock. Each bar represents an average of three (Class B  $\Delta$ <sup>NPyl</sup>tRNA<sub>CUA</sub>S, *Alv* <sup>$\Delta$ NPyl</sup>tRNA<sub>CUA</sub>, *Term* <sup>$\Delta$ NPyl</sup>tRNA<sub>CUA</sub> and no PylRS) or four (Class A  $\Delta$ <sup>NPyl</sup>tRNA<sub>CUA</sub>S except *Alv* <sup>$\Delta$ NPyl</sup>tRNA<sub>CUA</sub>S) biological replicates and error bars show the std. **a**, All combinations of Class A  $\Delta$ NPylRSs with each  $\Delta$ <sup>NPyl</sup>tRNA<sub>CUA</sub>. **b**, All combinations of Class B  $\Delta$ NPylRSs with each  $\Delta$ <sup>NPyl</sup>tRNA<sub>CUA</sub>. **c**, All combinations of *Term*PylRS with each  $\Delta$ <sup>NPyl</sup>tRNA<sub>CUA</sub>, and each  $\Delta$ <sup>NPyl</sup>tRNA<sub>CUA</sub> in the absence of any  $\Delta$ NPylRS.

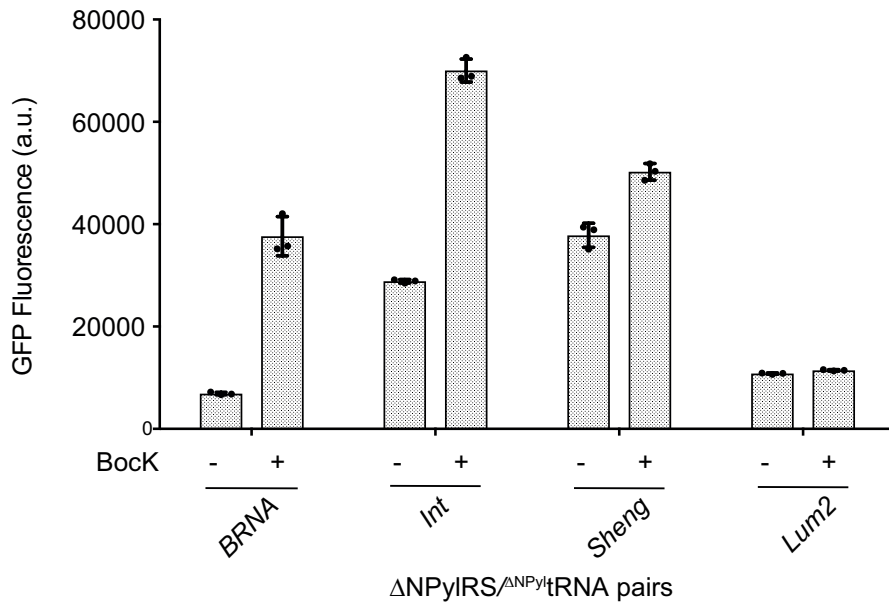

### Supplementary Figure 7

*In vivo* amber suppression activity of homologous combinations of  $\Delta NPyIRS/\Delta NPyI tRNA_{CUA}$  pairs, which were deemed not active and or orthogonal enough for further experiments. *In vivo* suppression activity was assayed in *E. coli* DH10B bearing pBAD GFP(150TAG)His<sub>6</sub>  $\Delta NPyIRS$  and pKW  $\Delta NPyI tRNA_{CUA}$  in the presence of Bock. Each bar represents an average of three biological replicates and error bars show the std.

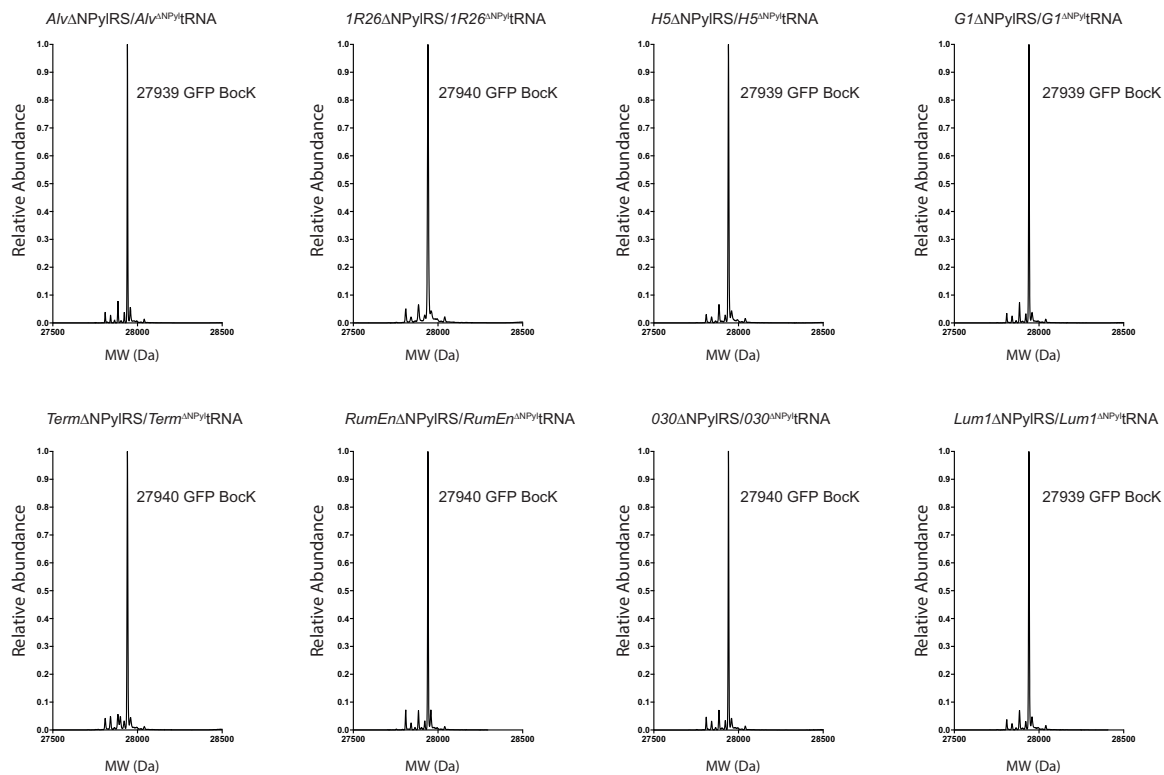

### Supplementary Figure 8

TOP-MS data of GFPHis<sub>6</sub> purified from *E. coli* DH10B bearing pBAD

GFP(150TAG)His<sub>6</sub> ΔNPyIRS and pKW<sup>ΔNPy</sup>tRNA<sub>CUA</sub> in the presence of BocK. The main peaks correspond to site-specific BocK incorporation (predicted mass 27,941 Da, observed masses 27,938 - 27,940 Da). No peak corresponding to the misincorporation of BocK in place of any canonical amino acid was observed.

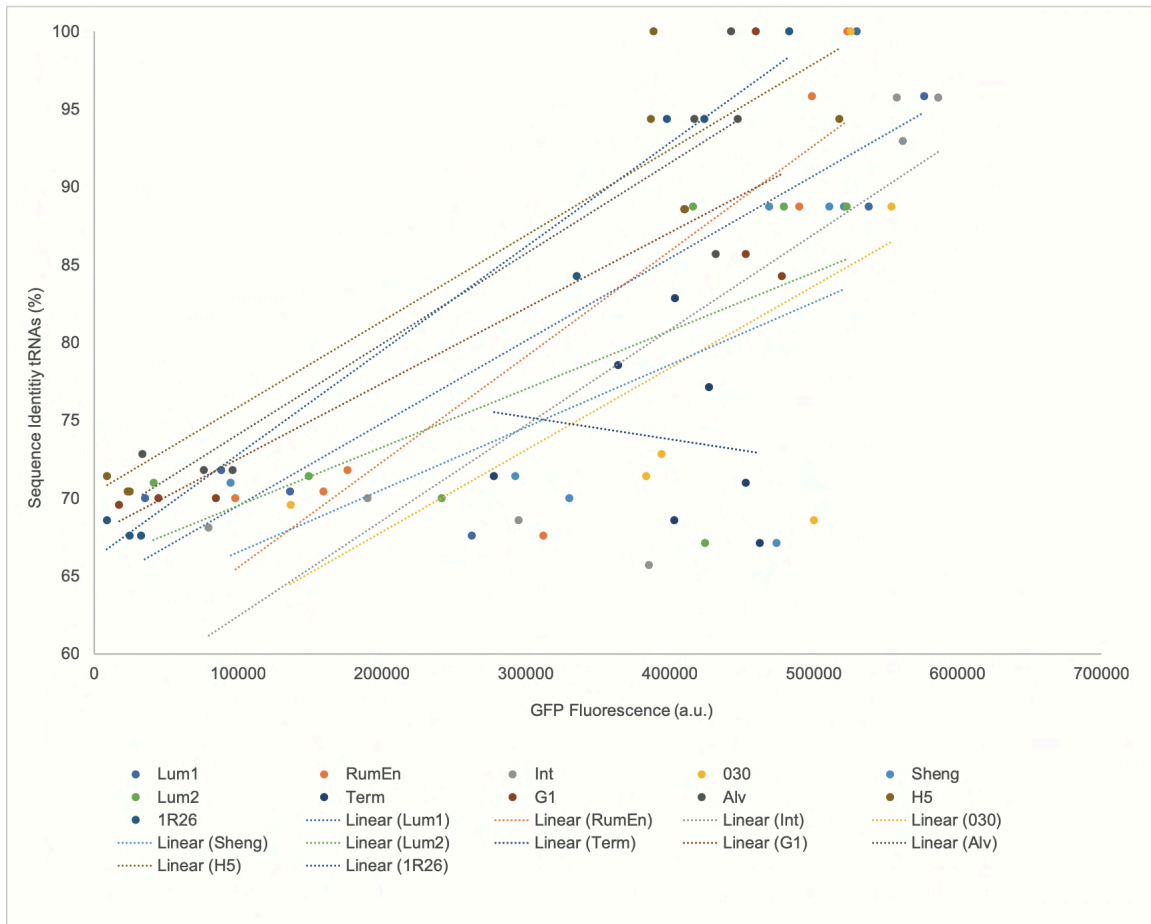

### Supplementary Figure 9

Linear correlation between the sequence identity scores of homologous and heterologous  $\Delta^{NPyl}$ tRNA combinations, and the functional activity of homologous and heterologous  $\Delta^{NPyl}IRS/\Delta^{NPyl}tRNA_{CUA}$  pairs as determined by *in vivo* suppression activity. The same sequence identity scores and *in vivo* amber suppression data are displayed as described in **Fig 1**. All  $\Delta^{NPyl}IRS$ s apart from *TermPyIRS* show a positive correlation between sequence identity and amber suppression activity.

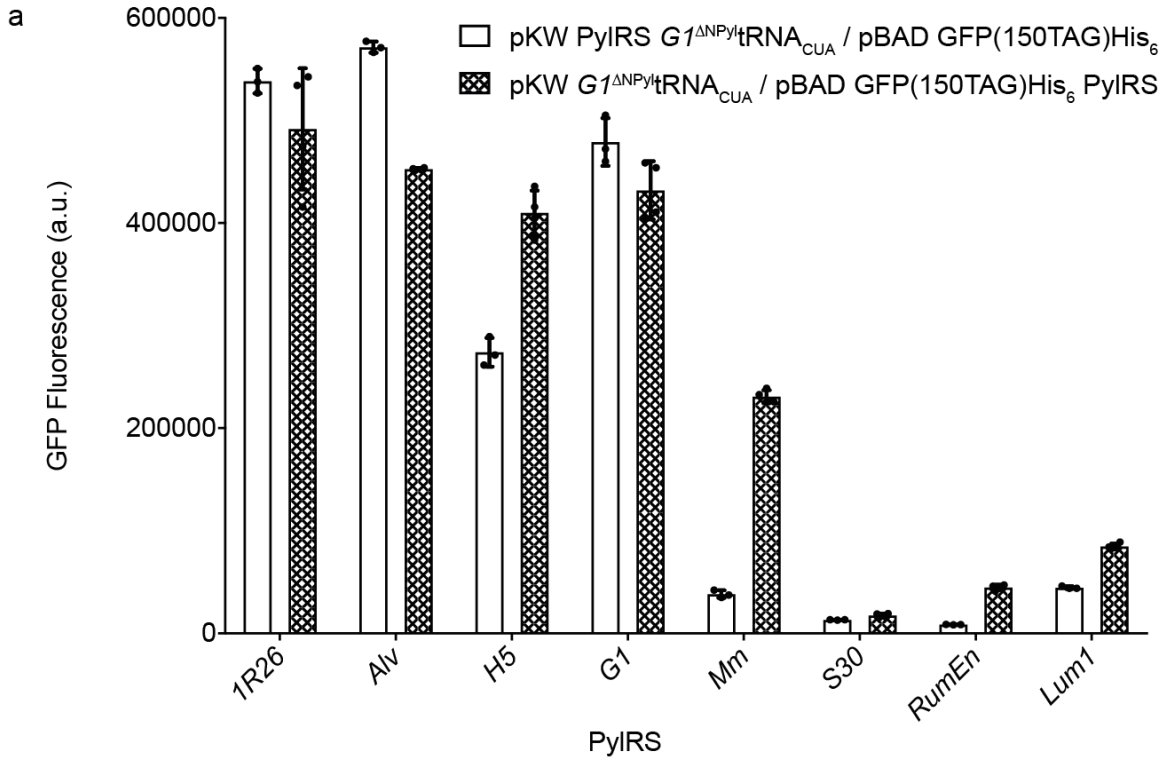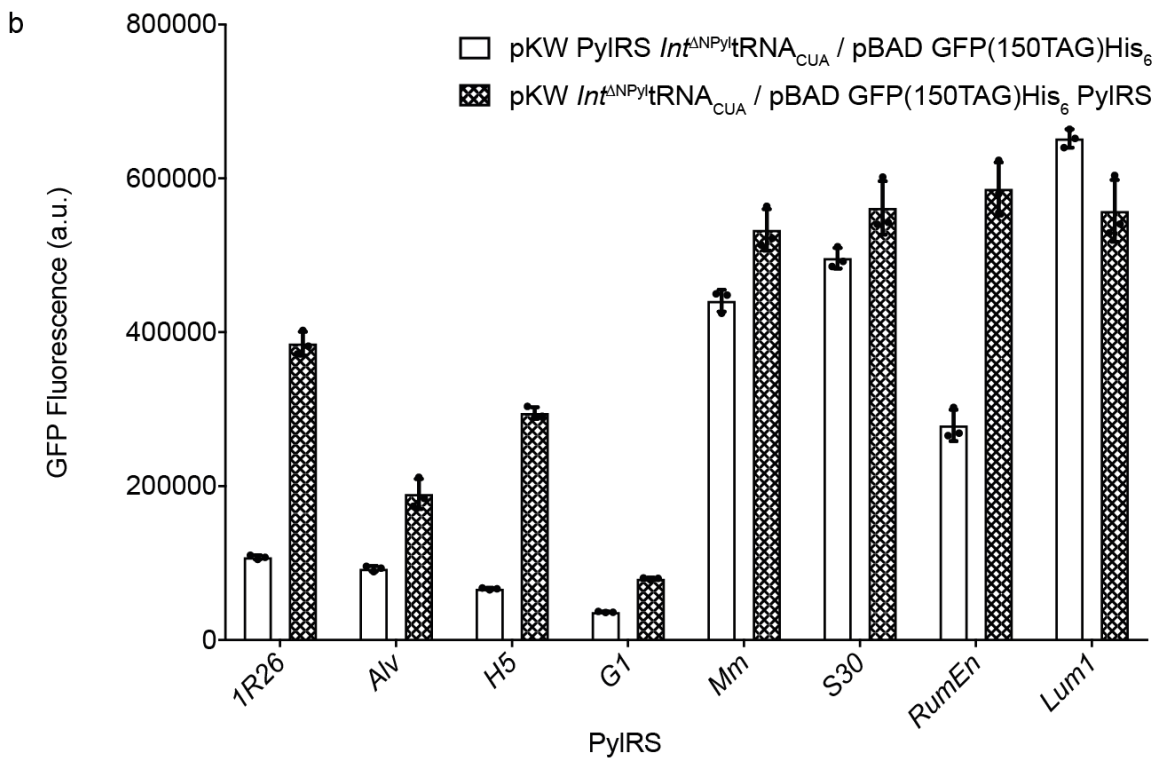



## Supplementary Figure 10

**a**, Comparison of *in vivo* amber suppression activity for  $GI^{\Delta NPyI}tRNA_{CUA}$  between the two expression systems used in this study. The same amber suppression data is displayed as described in **Fig. 1, 2 and Supplementary Fig. 6, 16, 18**. In one expression system (pKW  $\Delta NPyI$ tRNA<sub>CUA</sub>, pBAD GFP(150TAG)His<sub>6</sub> PyIRS) the tRNA and synthetase are expressed from different plasmids, while in the other expression system (pKW PyIRS  $\Delta NPyI$ tRNA<sub>CUA</sub> pBAD GFP(150TAG)His<sub>6</sub>) the tRNA and synthetase are both expressed from the same plasmid. In both cases GFP(150TAG)His<sub>6</sub> is expressed from a pBAD plasmid. Both data sets follow the same trends, however, when PyIRSSs are expressed from pBAD we note a general increase in activity for the less active PyIRS/ $\Delta NPyI$ tRNA<sub>CUA</sub> pairs. **b**, Comparison of *in vivo* amber suppression activity for  $Int^{\Delta NPyI}tRNA_{CUA}$  between the two expression systems used in this study, as in **a**.

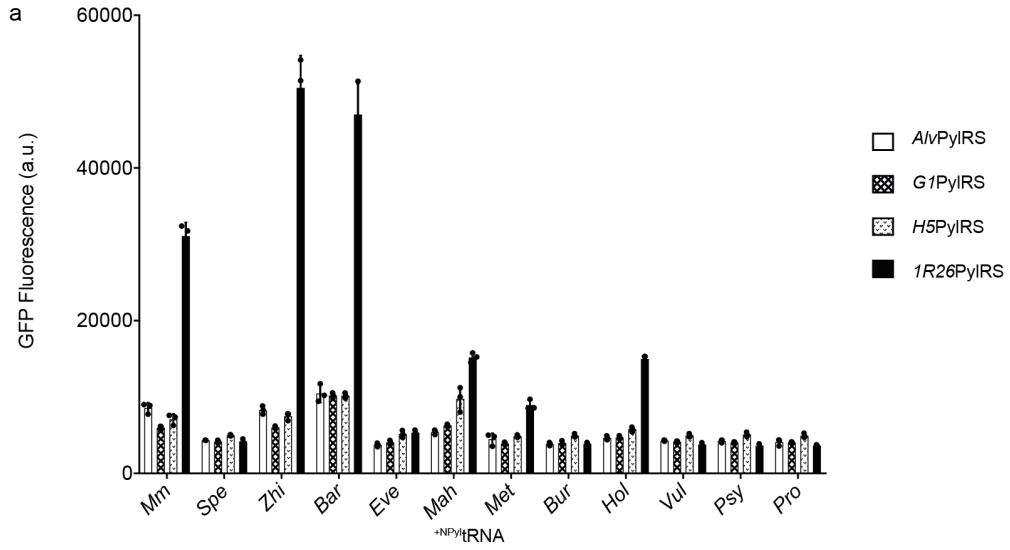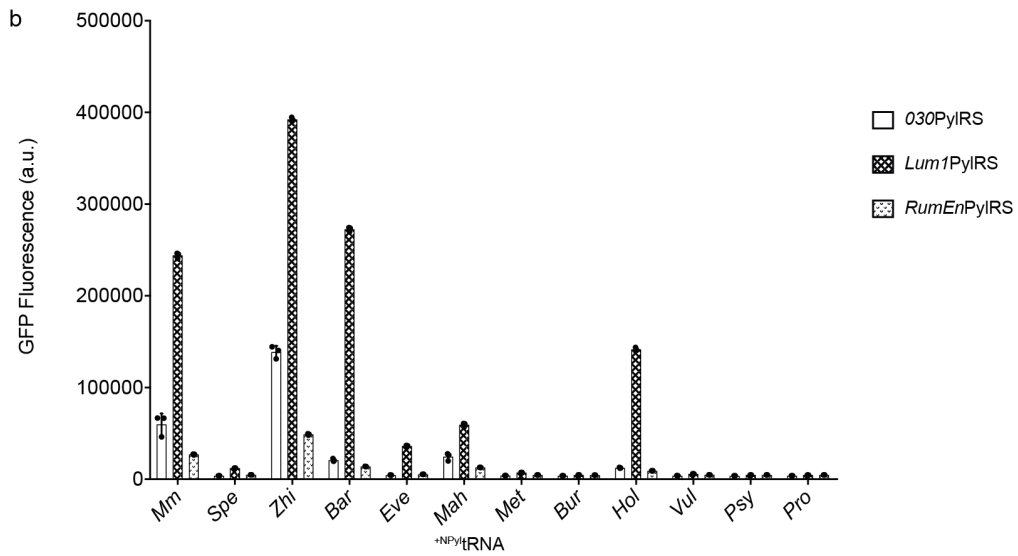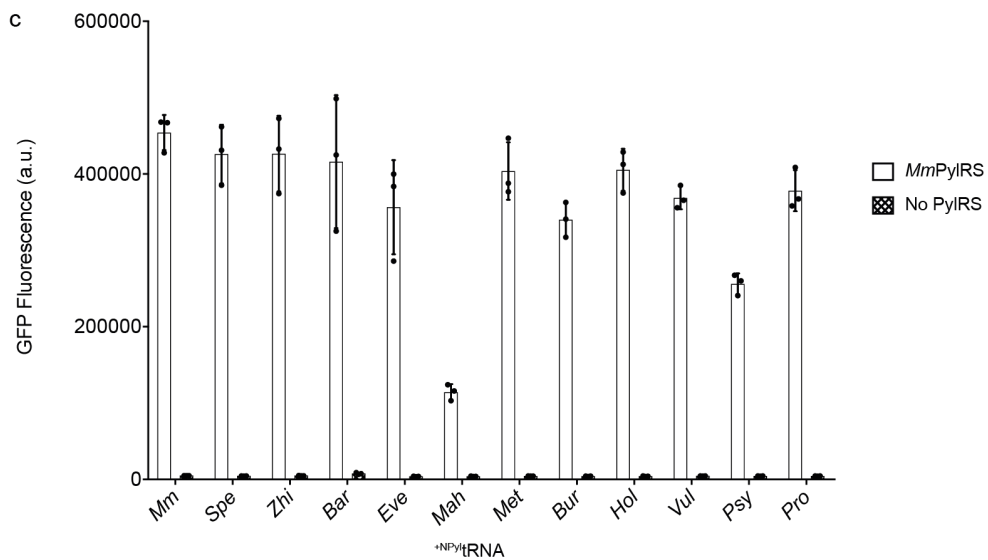

## Supplementary Figure 11

*In vivo* amber suppression activity of each  $^{+NPyI}tRNA_{CUA}$  with each PylRS. Measurements were made in *E. coli* DH10B bearing pBAD GFP(150TAG)His<sub>6</sub> PylRS and pKW  $^{+NPyI}tRNA_{CUA}$  in the presence of BocK. Each bar represents an average of three biological replicates and error bars show the std.. **a**, All combinations of Class A  $\Delta NPyIRS$ s with each  $^{+NPyI}tRNA_{CUA}$ . **b**, All combinations of Class B  $\Delta NPyIRS$ s with each  $^{+NPyI}tRNA_{CUA}$ . **c**, All combinations of *MmPylRS* with each  $^{+NPyI}tRNA_{CUA}$ , and each  $^{+NPyI}tRNA_{CUA}$  in the absence of any PylRS.

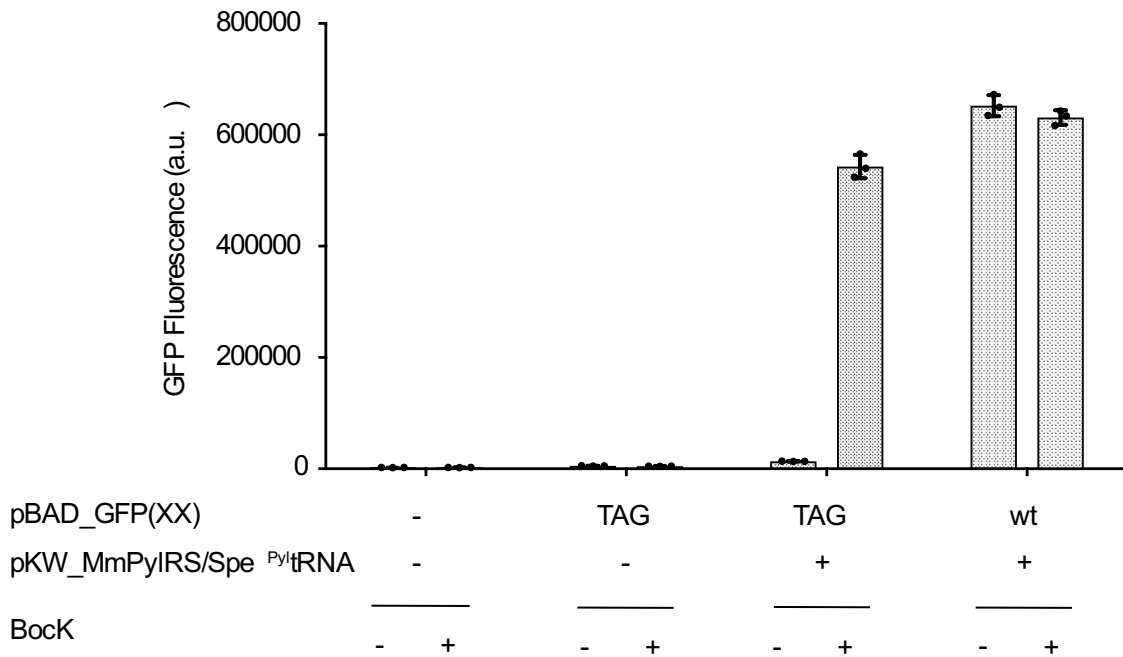

### Supplementary Figure 12

Comparison of *in vivo* amber suppression activity of *MmPylRS/Spe<sup>Pyl</sup>tRNA* with fluorescence of the empty DH10B cells, the reporter GFP(150TAG)His<sub>6</sub> in absence of synthetase and tRNA and GFP(wt)His<sub>6</sub>. *In vivo* fluorescence was assayed in *E. coli* DH10B without any plasmid, with just pBAD GFP(150TAG)His<sub>6</sub> or with a combination of pBAD GFP(150TAG)His<sub>6</sub>/pBAD GFP(wt)His<sub>6</sub> and pKW *Spe<sup>Pyl</sup>tRNA<sub>CUA</sub>*. Each experiment was run in presence or absence of BockK. Each bar represents an average of three biological replicates and error bars show the std. Amber suppression activity reached 80% of wt. level.

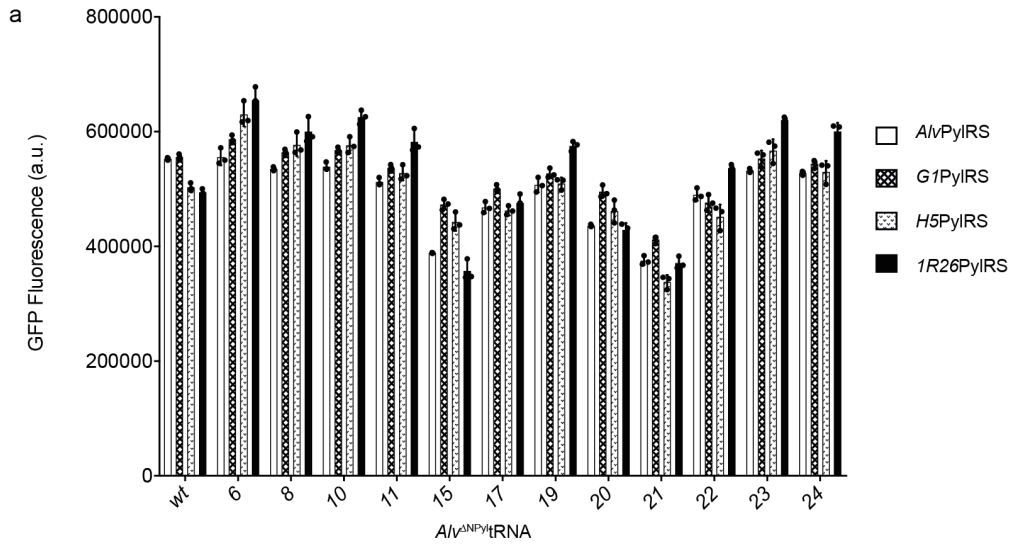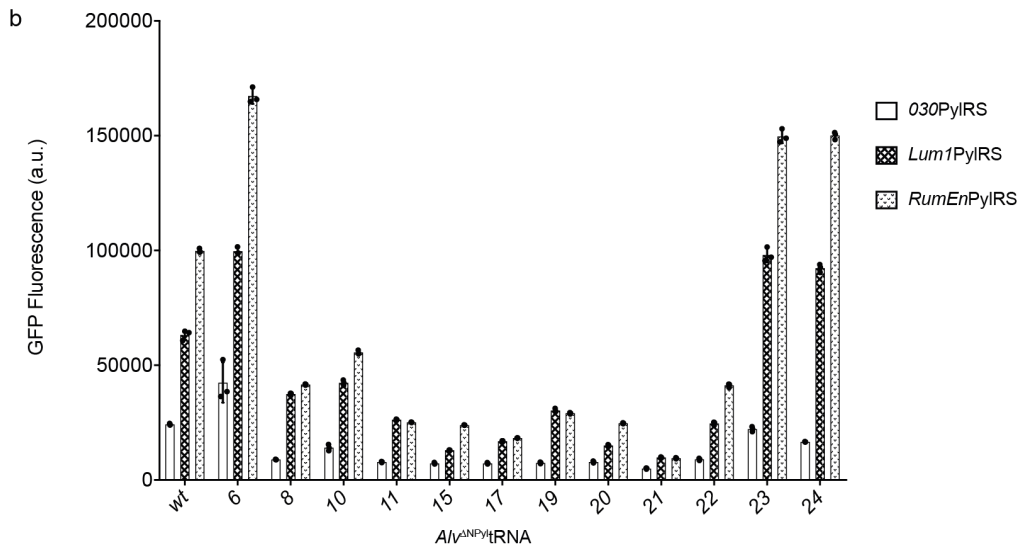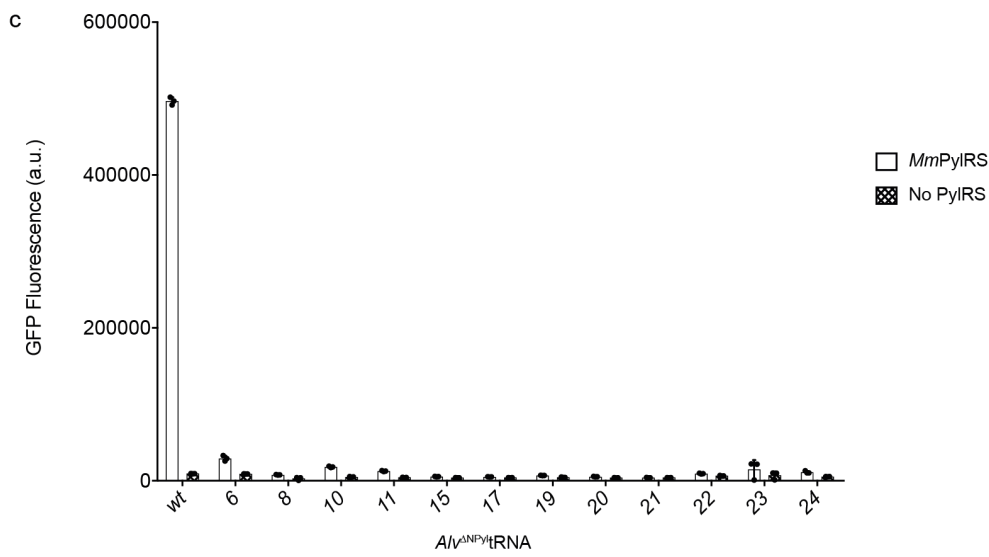

### Supplementary Figure 13

*In vivo* amber suppression activity of wild type  $Alv^{\Delta NPyI}$ tRNA<sub>CUA</sub> or each  $Alv^{\Delta NPyI}$ tRNA<sub>CUA</sub> variant with each indicated PyIRS. Measurements were made in *E. coli* DH10B bearing pBAD GFP(150TAG)His<sub>6</sub> PyIRS and pKW  $Alv^{\Delta NPyI}$ tRNA<sub>CUA</sub> in the presence of Bock. Each bar represents an average of three biological replicates and error bars show the std.. **a**, All combinations of Class A  $\Delta NPyIRS$ s with  $Alv^{\Delta NPyI}$ tRNA<sub>CUA</sub> or each  $Alv^{\Delta NPyI}$ tRNA<sub>CUA</sub> variant. **b**, All combinations of Class B  $\Delta NPyIRS$ s with  $Alv^{\Delta NPyI}$ tRNA<sub>CUA</sub> or each  $Alv^{\Delta NPyI}$ tRNA<sub>CUA</sub> variant. **c**, All combinations of *MmPyIRS* with  $Alv^{\Delta NPyI}$ tRNA<sub>CUA</sub> or each  $Alv^{\Delta NPyI}$ tRNA<sub>CUA</sub> variant, and  $Alv^{\Delta NPyI}$ tRNA<sub>CUA</sub> or each  $Alv^{\Delta NPyI}$ tRNA<sub>CUA</sub> variant in the absence of any PyIRS.

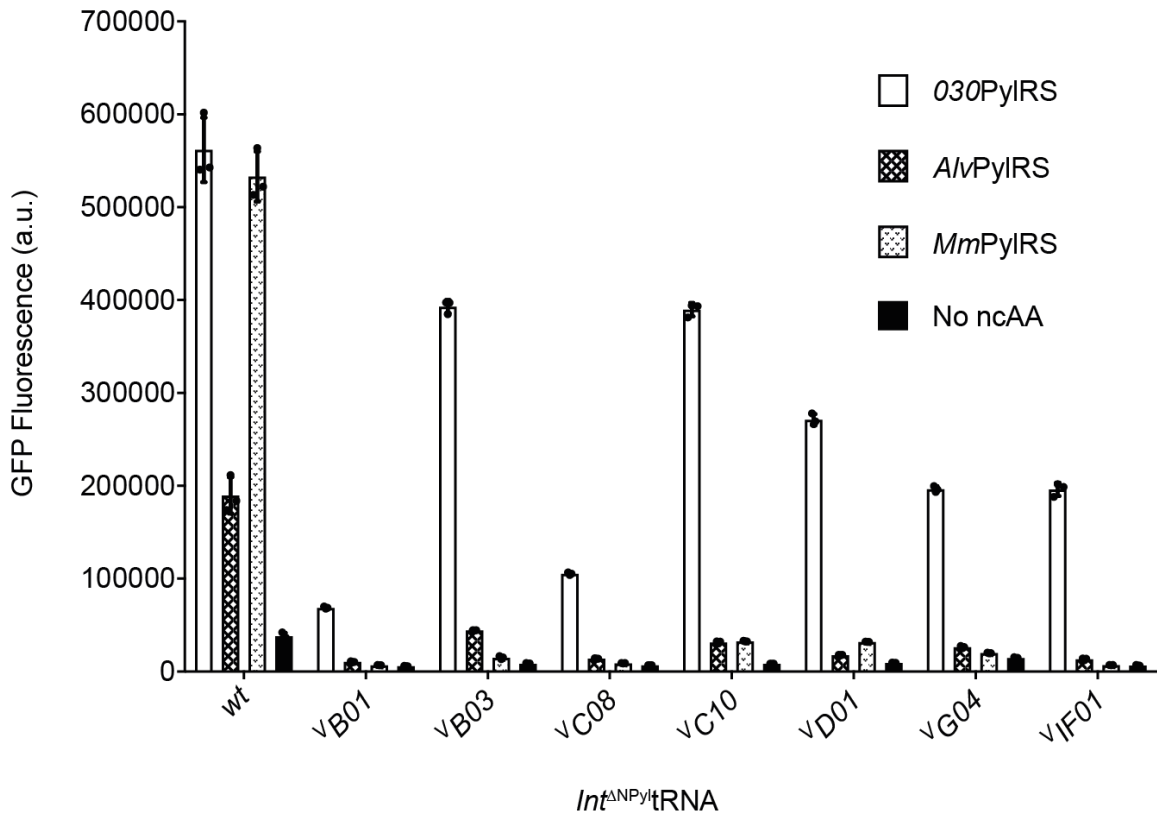

#### Supplementary Figure 14

*In vivo* amber suppression activity of each  $Int^{ANPyl}tRNA_{CUA}$  variable loop library hit with *MmPylRS* (Class +N), *AlvPylRS* (Class A) or *030PylRS* (Class B). Measurements were made in *E. coli* DH10B bearing pBAD GFP(150TAG)His<sub>6</sub> and pKW PylRS  $Int^{ANPyl}tRNA_{CUA}$  in the presence of Bock. Measurements for the background level of amber suppression activity in the absence of Bock were recorded for each  $Int^{ANPyl}tRNA_{CUA}$  variable loop library hit with *030PylRS* present in cells. Each bar chart represents three biological replicates with error bars showing std.. All hits showed improved orthogonality with respect to *MmPylRS* (Class +N) and *AlvΔNPylRS* (Class A). Only  $Int^{ANPyl}tRNA_{CUA}(vB03)$  and  $Int^{ANPyl}tRNA_{CUA}(vC10)$  were deemed sufficiently active for further studies.

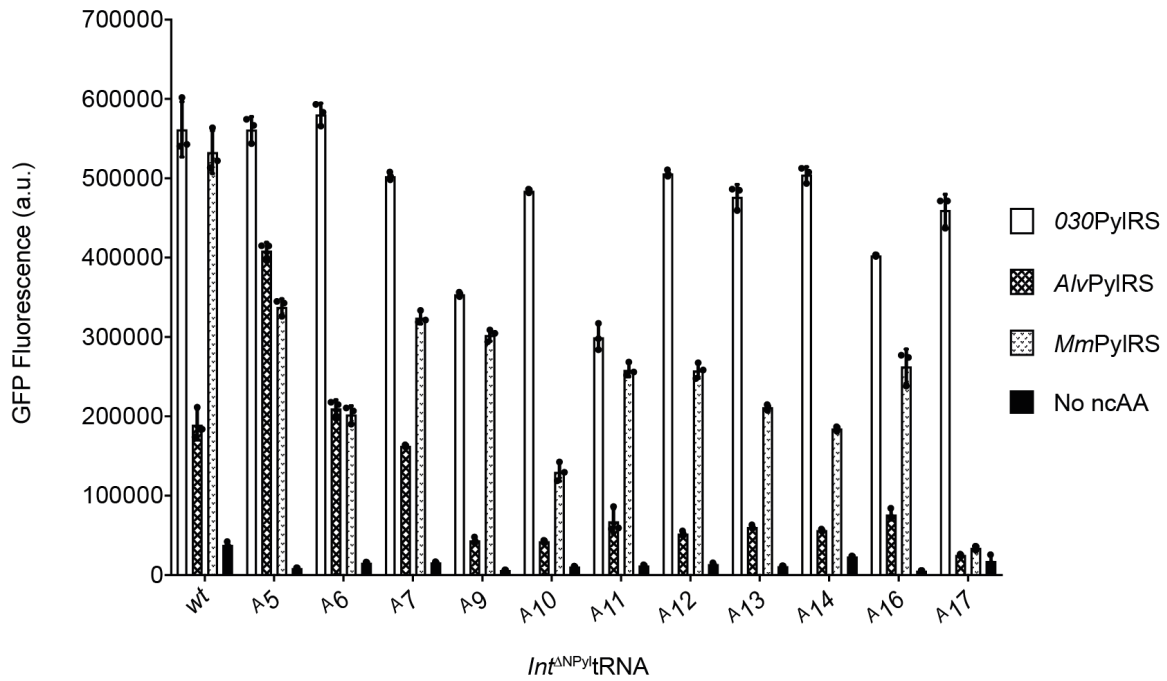

### Supplementary Figure 15

*In vivo* amber suppression activity of each  $Int^{ANPyl}tRNA_{CUA}$  acceptor stem library hit with *MmPylRS* (Class +N), *AlvPylRS* (Class A) or *030ΔNPylRS* (Class B). Measurements were made in *E. coli* DH10B bearing pBAD GFP(150TAG)His<sub>6</sub> and pKW PylRS  $Int^{ANPyl}tRNA_{CUA}$  in the presence of BockK. Measurements for the background level of amber suppression activity in the absence of BockK were made for each  $Int^{ANPyl}tRNA_{CUA}$  acceptor stem library hit with *030PylRS* present in cells. Each bar chart represents three biological replicates with error bars showing std.. All hits showed improved orthogonality with respect to *MmPylRS* (Class +N) and eight out of 11 hits showed improved orthogonality with respect to *AlvPylRS* (Class A).



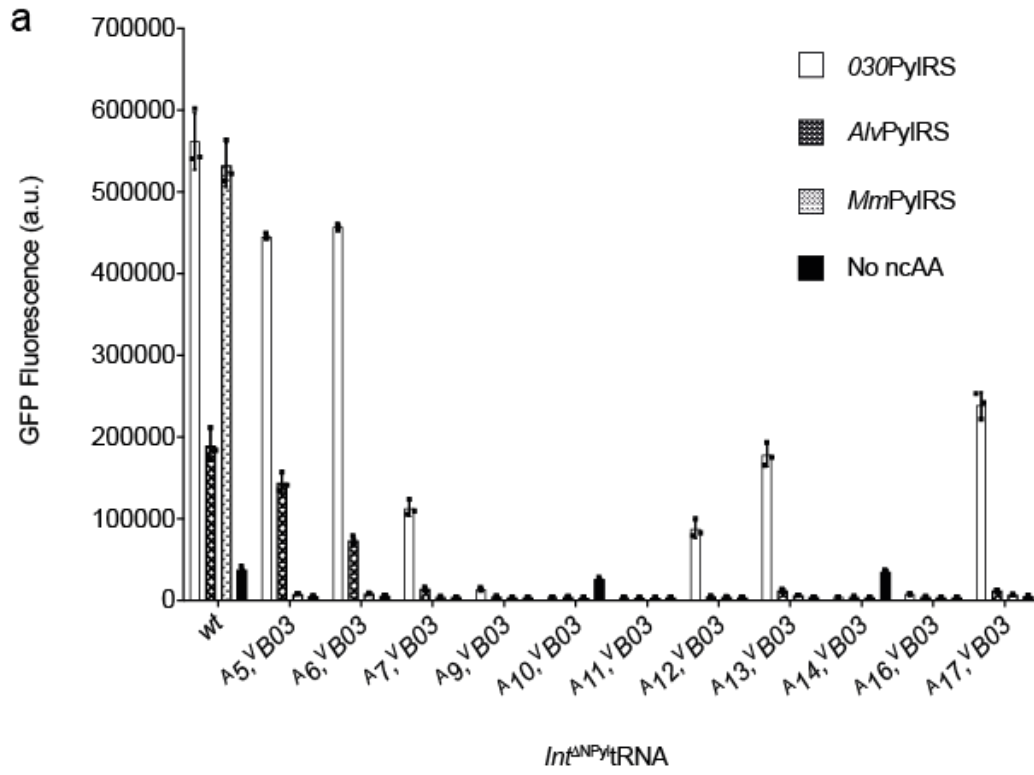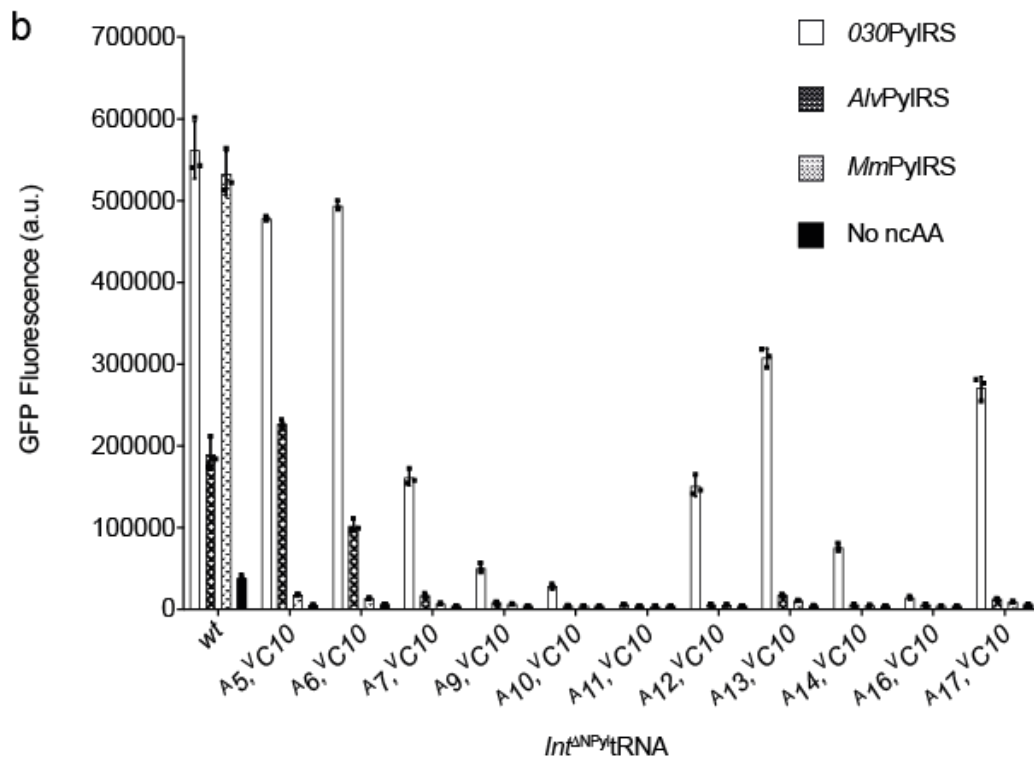

## Supplementary Figure 16

*In vivo* amber suppression activity of each  $Int^{\Delta N_{Pyl}}tRNA_{CUA}$  hybrid with *MmPylRS* (Class +N), *AlvPylRS* (Class A) or *030PylRS* (Class B). Measurements were made in *E. coli* DH10B bearing pBAD GFP(150TAG)His<sub>6</sub> and pKW PylRS  $Int^{\Delta N_{Pyl}}tRNA_{CUA}$  in the presence or absence of Bock. Measurements for the background level of amber suppression activity in the absence of Bock were made for each  $Int^{\Delta N_{Pyl}}tRNA_{CUA}$  hybrid with *030PylRS* present in cells. Each bar chart represents three biological replicates with error bars showing std.. All hybrids showed improved orthogonality with respect to *MmPylRS* (Class +N) and *AlvPylRS* (Class A). Seven of the 22 tested hybrids were deemed active enough to be used in further studies.

In this expression system both the synthetase and tRNA are expressed from the same plasmid, which differs from the expression system used for library selection and screening in which the synthetase and tRNA are expressed from separate plasmids. While the general trends are consistent between the two systems, we observed some qualitative differences (discussed in **Supplementary Fig. 7**).

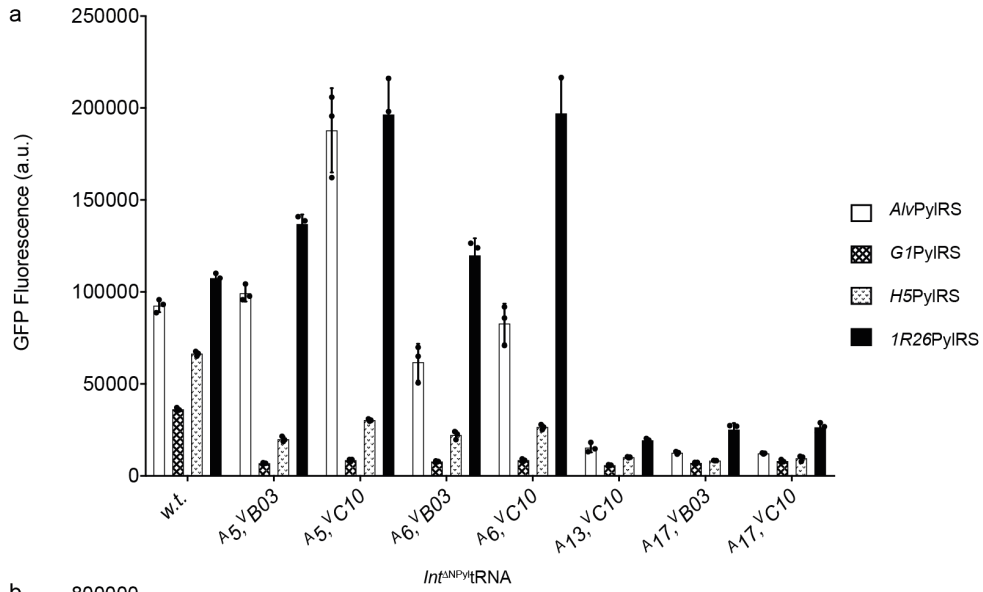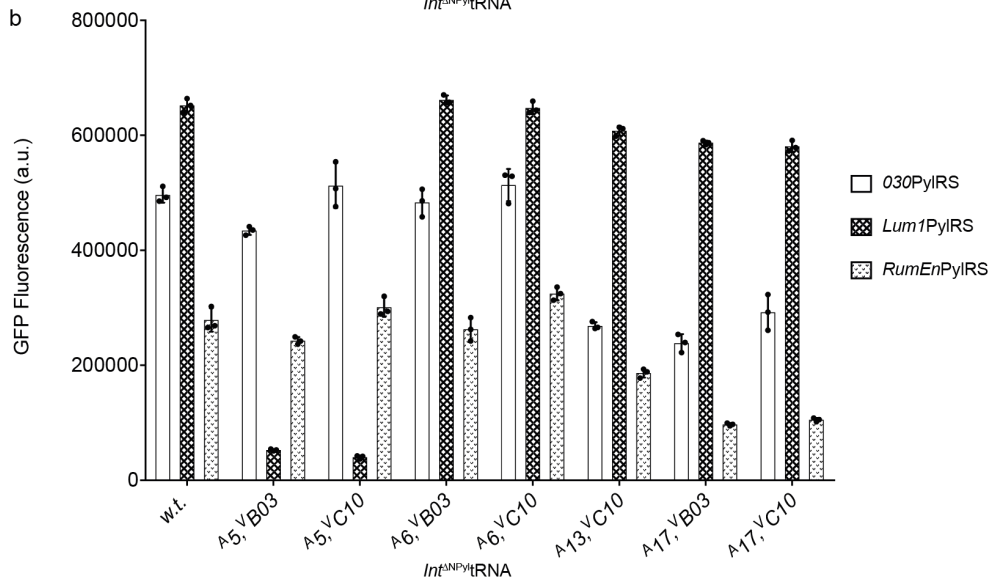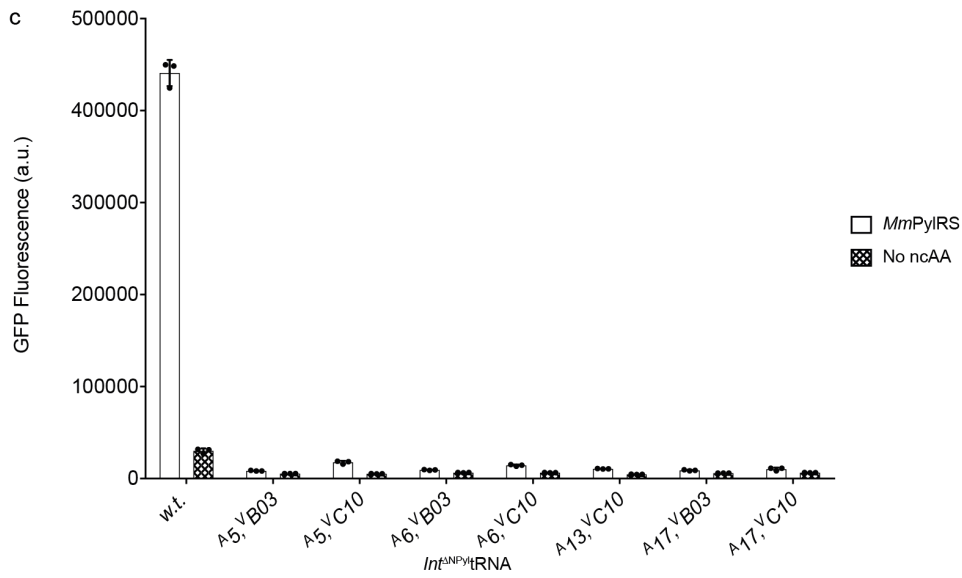

## Supplementary Figure 17

*In vivo* amber suppression activity of wild type  $Int^{\Delta NPyI}tRNA_{CUA}$  or each  $Int^{\Delta NPyI}tRNA_{CUA}$  hybrid with each PylRS. Measurements were made in *E. coli* DH10B bearing pBAD GFP(150TAG)His<sub>6</sub> and pKW PylRS  $Int^{\Delta NPyI}tRNA_{CUA}$  in the presence or absence of Bock. Each bar represents three biological replicates and errors are given as std.. **a**, All combinations of Class A  $\Delta NPyIRS$ s with  $Int^{\Delta NPyI}tRNA_{CUA}$  or each  $Int^{\Delta NPyI}tRNA_{CUA}$  hybrid in the presence of Bock. **b**, All combinations of Class B  $\Delta NPyIRS$ s with  $Int^{\Delta NPyI}tRNA_{CUA}$  or each  $Int^{\Delta NPyI}tRNA_{CUA}$  hybrid in the presence of Bock. **c**, All combinations of *Mm* $\Delta NPyIRS$  with  $Int^{\Delta NPyI}tRNA_{CUA}$  or hybrid  $Int^{\Delta NPyI}tRNA_{CUA}$  hybrid in the presence of Bock, and  $Int^{\Delta NPyI}tRNA_{CUA}$  or each  $Int^{\Delta NPyI}tRNA_{CUA}$  hybrid in the absence of Bock and presence of *030*PylRS. We identified several  $Int^{\Delta NPyI}tRNA_{CUA}$  hybrids which were orthogonal to *Mm*PylRS and some Class A  $\Delta NPyIRS$ s, whilst being highly active with specific Class B  $\Delta NPyIRS$ s.

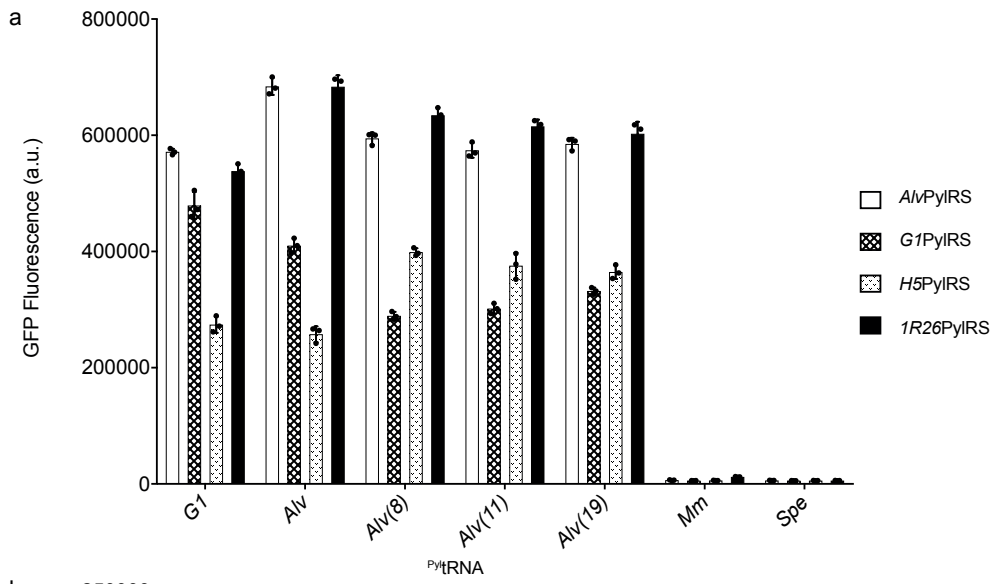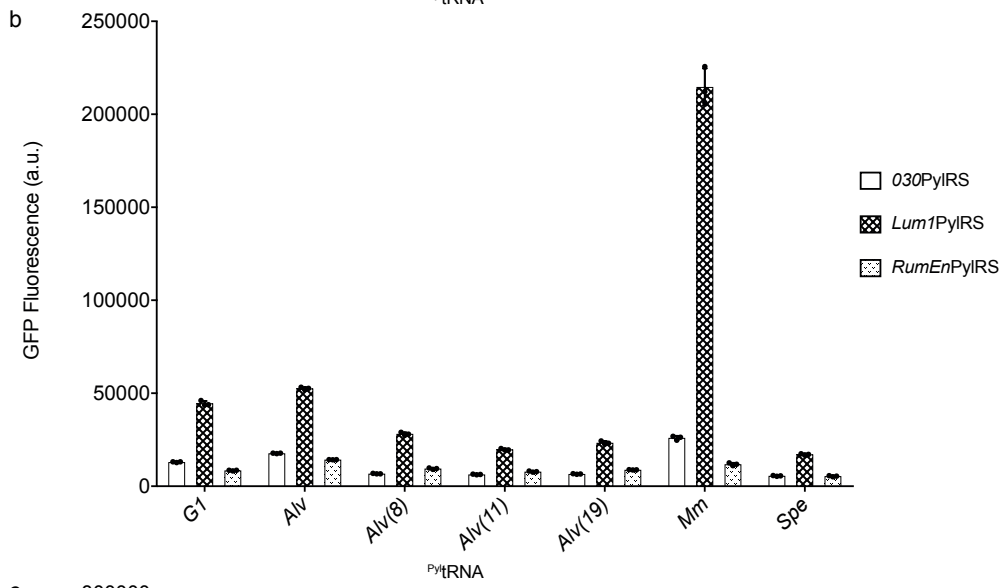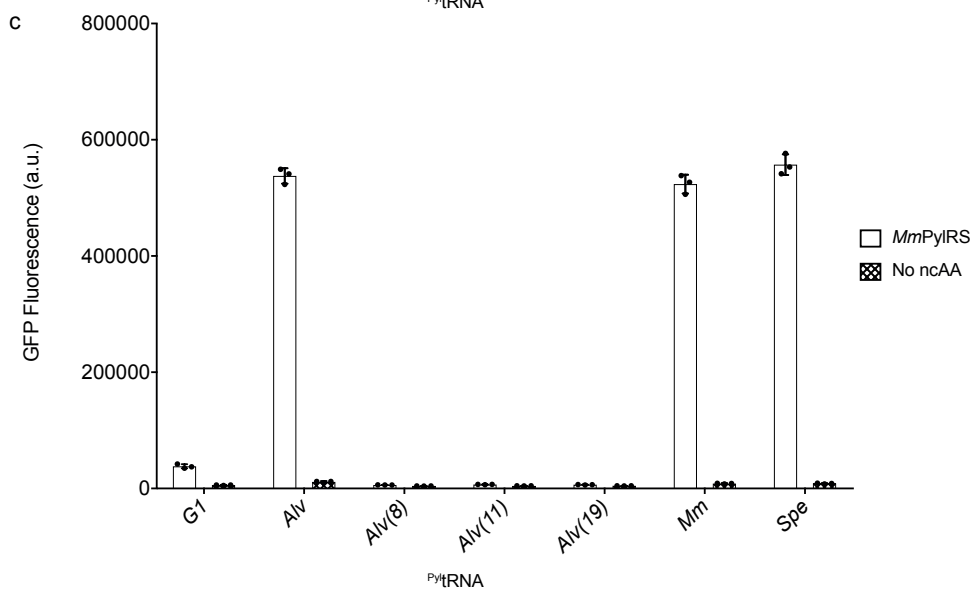

### Supplementary Figure 18

*In vivo* amber suppression activity of discovered or evolved  $^{Pyl}tRNA_{CUA}$ s used as part of triply orthogonal PylRS/ $^{Pyl}tRNA$  pairs as compared against their starting wild type sequence. Measurements were made in *E. coli* DH10B bearing pBAD GFP(150TAG)His<sub>6</sub> and pKW PylRS  $^{Pyl}tRNA_{CUA}$  in the presence or absence of BocK. Each bar represents three biological replicates and errors are given as std.. **a**, All combinations of Class A  $\Delta$ NPylRSs with each  $^{Pyl}tRNA_{CUA}$  in the presence of BocK. **b**, All combinations of Class B  $\Delta$ NPylRSs with each  $^{Pyl}tRNA_{CUA}$  in the presence of BocK. **c**, All combinations of *Mm*PylRS with each  $^{Pyl}tRNA_{CUA}$  in the presence of BocK, and each  $^{Pyl}tRNA_{CUA}$  in the absence of BocK and presence of *030*PylRS.

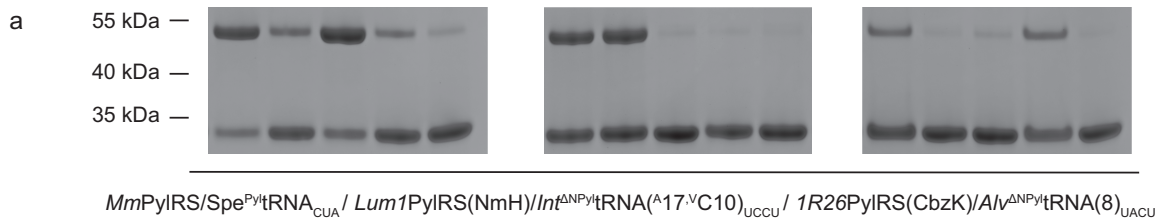

| O-GST-CAM (XXX) | TAG |   |   |   |   | AGGA |   |   |   |   | AGTA |   |   |   |   |
|-----------------|-----|---|---|---|---|------|---|---|---|---|------|---|---|---|---|
| CbzK            | +   | - | - | + | - | +    | - | - | + | - | +    | - | - | + | - |
| BocK            | +   | - | + | - | - | +    | - | + | - | - | +    | - | + | - | - |
| NmH             | +   | + | - | - | - | +    | + | - | - | - | +    | + | - | - | - |

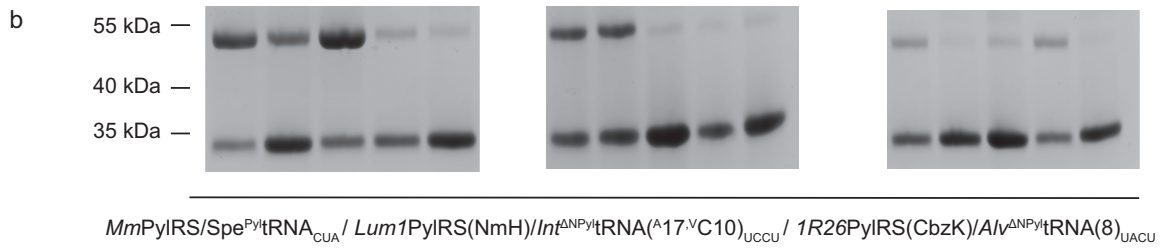

| O-GST-CAM (XXX) | TAG |   |   |   |   | AGGA |   |   |   |   | AGTA |   |   |   |   |
|-----------------|-----|---|---|---|---|------|---|---|---|---|------|---|---|---|---|
| CbzK            | +   | - | - | + | - | +    | - | - | + | - | +    | - | - | + | - |
| BocK            | +   | - | + | - | - | +    | - | + | - | - | +    | - | + | - | - |
| NmH             | +   | + | - | - | - | +    | + | - | - | - | +    | + | - | - | - |

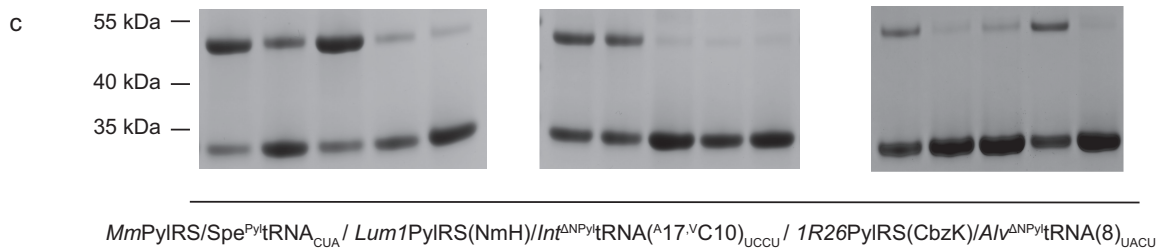

| O-GST-CAM (XXX) | TAG |   |   |   |   | AGGA |   |   |   |   | AGTA |   |   |   |   |
|-----------------|-----|---|---|---|---|------|---|---|---|---|------|---|---|---|---|
| CbzK            | +   | - | - | + | - | +    | - | - | + | - | +    | - | - | + | - |
| BocK            | +   | - | + | - | - | +    | - | + | - | - | +    | - | + | - | - |
| NmH             | +   | + | - | - | - | +    | + | - | - | - | +    | + | - | - | - |

### Supplementary Figure 19

Glutathione-S-Transferase-calmodulin (GST-CAM) purifications from *E. coli* containing ribo-Q1, O-GST-CAM(1XXX), where XXX stands for either TAG, AGGA or AGTA, *Mm*PylRS/*Spe*PyltRNA<sub>CUA</sub>, *LumI*PylRS(NMH) /*Int*PyltRNA(<sup>A</sup>17,<sup>V</sup>C10)<sub>UCCU</sub> and *IR26*PylRS(Cbz) /*Ma*PyltRNA(8)<sub>UACU</sub> grown in the presence and absence of the 8 mM Bock, 8mM NmH and 2 mM CbzK. Samples were analysed by SDS-PAGE. a, b, c are biological replicates and yielded similar results.



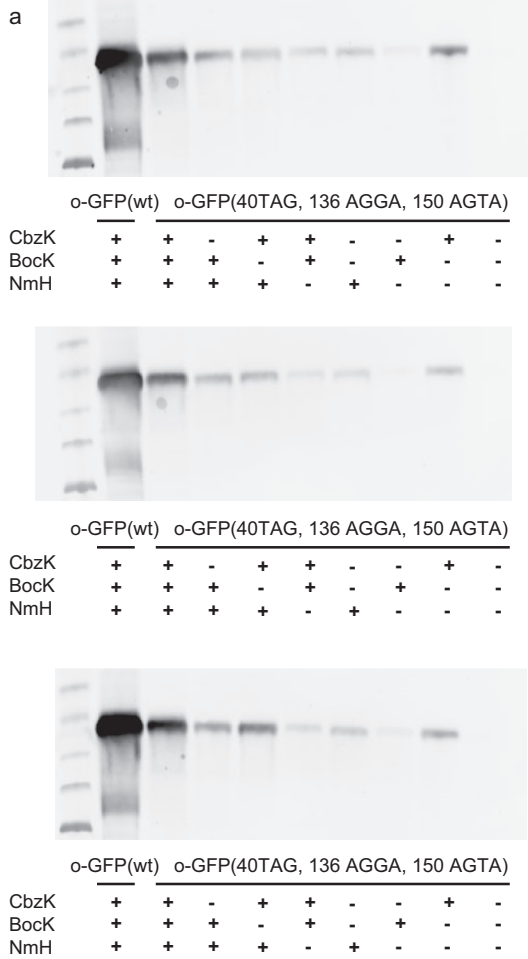

## Supplementary Figure 20

Nickel NTA purification of  $O_{\text{strep}}\text{GFP}(\text{XXX})_{\text{His6}}$ , where XXX stands for either wt or 40TAG, 136 AGGA and 150 AGTA, from *E. coli* containing ribo-Q1,  $O_{\text{strep}}\text{GFP}(\text{XXX})_{\text{His6}}$ , *MmPylRS/SpePyltRNA*<sub>CUA</sub>, *LumIPylRS(NMH)/IntPyltRNA*(<sup>A</sup>17,<sup>V</sup>C10)<sub>UCCU</sub> and *IR26PylRS(CbzK)/MaPyltRNA*(8)<sub>UACU</sub> in absence and presence of indicated ncAAs (8 mM BocK, 8 mM NmH, 2 mM CbzK) analysed by western blot. Three biological replicates were performed yielding similar results.

## Supplementary Tables

### Supplementary Table 1

Species, abbreviations (abbrev.), original reporting and sequences of all  $\Delta^{N\text{Pyl}}$ tRNAs used in this work.

| Species                                                        | Abbrev.      | Reported                              | Sequence                                                                         |
|----------------------------------------------------------------|--------------|---------------------------------------|----------------------------------------------------------------------------------|
| <i>Methanomethylophilus</i> sp.<br><i>IR26</i>                 | <i>IR26</i>  | This work                             | GGGGGACGATCCGGCGATCAGCGGGT<br>CTCTAAAACCTAGCCAGCGGGGATCGA<br>CACCCCGGTCTCTCGCCA  |
| <i>Thermoplasmatales</i><br>archaeon <i>BRNA1</i>              | <i>BRNA</i>  | This work                             | GGGGGACGATCCGGCGATCAGCGGGT<br>CTCTAAAACCTAGCCAGCGGGGATCGA<br>CACCCCGGTCTCTCGCCA  |
| <i>Methanomassiliicoccales</i><br>archaeon <i>PtaUI.Bin030</i> | <i>030</i>   | This work                             | GGAGGGTTGGTCCGGGACCACCTGGCC<br>TCTACAGCTAAGGCAGCCGGGTTCAAC<br>TCCCGGGCCCTTCGCCA  |
| <i>Methanomassiliicoccales</i><br>archaeon <i>RumEn M1</i>     | <i>RumEn</i> | This work                             | GGAGTGTTGGTCCGGAGACCACAGGC<br>CTCTACAGCCGCGGCAGCCGGGTTCTGA<br>CTCCCGGGCACTTCGCCA |
| <i>Methermicoccus</i><br><i>shengliensis</i>                   | <i>Sheng</i> | This work                             | GGAGGGTTGGTCCGGGACCGCCAGGC<br>CTCTACAGCCACGGTAGCTGGGTTCTGA<br>CTCCAGGCCCTTCGCCA  |
| <i>Methanogenic</i> archaeon<br><i>ISO4-G1</i>                 | <i>G1</i>    | (2018) Willis<br>et al. <sup>10</sup> | GGAGGGCGCTCCGGCGAGCAAACGGG<br>TCTCTAAAACCTGTAAGCGGGGTTCTGA<br>CCCCCGGCCTTCGCCA   |
| <i>Methanogenic</i> archaeon<br><i>ISO4-H5</i>                 | <i>H5</i>    | (2018) Willis<br>et al. <sup>10</sup> | GGGGGGCGATCCGGCGATCAGCGGGT<br>CTCTAAAACCTAGCCAGCGGGGTTCTGA<br>CGCCCCGGCCTTCGCCA  |
| <i>Methanoplasma</i> <i>termitum</i>                           | <i>Term</i>  | (2018) Willis<br>et al. <sup>10</sup> | GGGAGACGGTCTGGGACCAGTAGGCC<br>TCTAAAGCTCAACCAGCGGGGTTCTGAT<br>CCCCCGGTCTCTCGCCA  |
| <i>Methanomethylophilus</i><br><i>alvus</i>                    | <i>Alv</i>   | (2014) Borrel<br>et al. <sup>11</sup> | GGGGGACGGTCCGGCGACCAGCGGGT<br>CTCTAAAACCTAGCCAGCGGGGTTCTGA<br>CGCCCCGGTCTCTCGCCA |
| <i>Methanomassiliicoccus</i><br><i>luminyensis 1</i>           | <i>Lum1</i>  | (2014) Borrel<br>et al. <sup>11</sup> | GGAGTGTTGGTTCGGCGACCACAGGC<br>CTCTACAGCCACGGCAGCCGGGTTCTGA<br>CTCCCGGGCACTTCGCCA |
| <i>Methanomassiliicoccus</i><br><i>luminyensis 2</i>           | <i>Lum2</i>  | (2014) Borrel<br>et al. <sup>11</sup> | GGAGGGTTGGTCAGGGACCGCCAGGC<br>CTCTACAGCCACGGCAGCCGGGTTCTGA<br>CTCCCGGGCCCTTCGCCA |
| <i>Methanomassiliicoccus</i><br><i>intestinalis</i>            | <i>Int</i>   | (2014) Borrel<br>et al. <sup>11</sup> | GGAGTGTTGGTCCGGGACCACAGGCC<br>TCTACAGCCACGGCAGCCGGGTTCAAC<br>TCCCGGGCACTTCGCCA   |

## Supplementary Table 2

Species, abbreviations (abbrev.), original reporting, amino acid and nucleotide sequences of all PylRSs used in this work.

| Species                                                      | Abbrev. | Reported                           | Amino acid sequence                                                                                                                                                                                                                                                                                                  | Nucleotide sequence                                                                                                                                                                                                                                                                                                                                                                                                                                                                                                                                                                                                                                                                                                                                                                                                                                                                              |
|--------------------------------------------------------------|---------|------------------------------------|----------------------------------------------------------------------------------------------------------------------------------------------------------------------------------------------------------------------------------------------------------------------------------------------------------------------|--------------------------------------------------------------------------------------------------------------------------------------------------------------------------------------------------------------------------------------------------------------------------------------------------------------------------------------------------------------------------------------------------------------------------------------------------------------------------------------------------------------------------------------------------------------------------------------------------------------------------------------------------------------------------------------------------------------------------------------------------------------------------------------------------------------------------------------------------------------------------------------------------|
| <i>Methanomassiliicoccus archaeon</i><br><i>PtaU1.Bin030</i> | 030     | This work                          | MVIEWSPSQKQRLRELGRADEGMEFETVV<br>ERDEAFTKEVAYYOSINRKEIRNIQERRERHL<br>LAKVEENIAEALIDGFLVETRTPIHSNGLV<br>KMGIDHNHPLREQVFWLQSGRSLRPLMAPN<br>LYFLMRHLKRNVRMPLQMEFIEGTCYRKESH<br>GSHLEEFMLNLVEMASMDPAVRLRHHI<br>QTVMGAIGLEYELSECESDVYGRITDVEVNG<br>VEVASAALGPHKLDPAHGITDAWSGVGFL<br>ERLLMVKNAENIKKVGSRSLYLGARLDI          | ATGGTCATTGAATGGAGCCGCTCAAAGCAACCGTTCGCGTGAAT<br>TAGGCCGCGACGACGAGGGGGGCGATGGAGTTTGAAACCGTTGTGA<br>ACCGGACGAAGCGTTACGAAAGAAGTAGCTTACTATAAAGTATC<br>AATCGTAAAGAAATCCGTAACATCCAGGAGCGCCGCAACCGCATC<br>TTCTGGCAAAGGTTGAGGAGAAATCCGGGAGGCGATGATCGCAGA<br>TGGATTTTTAGAGGTTCCGACCCCACTATCTCTGGAAATGCTC<br>TGGTGAAGATGGGGATCGATCATAATCATCCATTACCGGAGCAGGT<br>TTTTGGCTGGACGGCTCCGCTGTTTACGCCCCCATGGCCCTCCA<br>ACCTTTATTTCTGATGCGTCACTGAAACGCAATGTTCTGATGCCA<br>CTGCAAATGTTGAAATCGGCACATGCTACCGTAAGAGTCCACG<br>GCTCAAACCATTTAGAAGAGTTTACGATGTTGAACTTAGTGGAAAT<br>GGCTTCGATGGACGATCTGCCCTCCGTTTGGCCACCATATTCAAA<br>CGGTAATGGGGCAATCGGCTGGAATATGAATATCCGAATGCGA<br>GTCCGACGTGACGGGCGCAACATCGACGTTGAGGTCAATGGCGTG<br>GAAGTGCTTCAGCAGCTCTGGGACCTCACAACTGGACCCGGCGC<br>ATGGTATCACCGATGCTTGGAGCGGGTGGGTTGGTCTGAAACG<br>TTTATAATGGTCAAAAACGCTGAAAATAATATAAGAAAGTCCGG<br>CGCTCAATTAATCTACCTGGGAGGAGCCGCTGGACATTTAA |
| <i>Methanomassiliicoccus archaeon</i><br><i>PtaU1.Bin124</i> | 124     | This work                          | MAITFSAQNQRIREDCESNLGEFETESE<br>REDVFRKVVNDLVDKNSDLSFARMPTDS<br>GMHQLQCTLANKLAVSGFMQVHTPTMMSV<br>ASLEKMGIDHDLRRQIFSLDQNRCLRPLM<br>APNLYAVMKRMARAVPGRFGEIFGCFRKE<br>SKGAHHIEFTMLNLVDVRFSDGPEARLKE<br>SGLLSRDLGLPIEAQEGSDVYGTLDLEVNG<br>VELASAAVGPHPDKAFHIVDFWAGIGMGL<br>ERVLMVQAGSSNHRHAASLVYQYGRITDI                 | ATGGCAATTACTTCTCCGACGACAGAACAGCGCATCCGTTGAGC<br>TGGATTGCGAGTCAAATAGGTGAATGCATCTCGAAACCGGAGG<br>TGAGCGGAAGATGTTTTCGTAAGTCGTAATGATTTGGTTGAC<br>AAGAACCCTCCGATCTTTATCTTTCGACGCGATCCGGATACAG<br>CGGTATGCATCAGTTCAGTGCACCTTGCACCGCTTTGGCCGTT<br>CTGGGTTTCATGCAAGTGCATACTCCAACATGATGAGGCGGTCT<br>TTGGAGAAAGTGGGAATTGGGACGACACCCCTTCTGTCGACAGA<br>TTTTTCTTGGACCAAATCCGCTGCTGCTGCAATGCTGCTCCG<br>AACCTGTACGCAAGTATGAAACGATAGCTGCTGCTGCTGCTGCT<br>GTTTGGTATCTCGAGATCGCAAATGTTTTCGTAAGAGAGTAA<br>AGGGGCTCACACATCGAAGAGTTCACATGTTGAACCTGGTAGAC<br>GTCCGCTCCGATGCTGCTGAGGCCGCTTATAAGAGTATCCG<br>GGCTTCTTCCCGTATCTGGGATACCTATGAAATGACACAGGAG<br>GGTTCAGATGCTATGGTACGACCTTGGATCTTGAAGTGAATGGG<br>TGGAGTTCGCTTCGGGCTTATGGACACACCCCTTGTATAAAGCG<br>TTTATGTAGACTTCCATGGCGGGTATCGGGATGGGTCTGGAGC<br>GTGCTTAATGGTCAAGCGGGTATGATGAATCAATCCATCGCATGC<br>CGTAGTTTATGATATCAGTATGGGACGCGTATCGATTTTAA                     |
| <i>Methanomethylophilus</i><br><i>s. sp. 1R26</i>            | 1R26    | (2018) Willis et al. <sup>10</sup> | MAEHFTDAQIQLREYNGNTYKDFEADVS<br>AREKAFTKLMSDASRDNESALKGMIHAPAR<br>QGLSRLMNDIADALVADGFIEVIRTPHISKDA<br>LAKMTITPDKPLFKQVFWIDDKRALRPLMAP<br>SLYTVMRSRLRHDITDGPVKIFEMGSCFRKESH<br>SGMHLEEFMLNLVDMGPAGDATSLKKYI<br>GIVMKAAGLPDYQLVHEESDVYKETIDVEIN<br>GQEVCSAAVPHYLDAADHVEHPWAGAGF<br>GLERLLTIRQGYSTVMKGGASTYLNAGAKM<br>D | ATGGCAGAACATTTACAGATGCAAGATTCAGCGCTTACCGGAGT<br>ATGGTAATGGGACATATAAGGATATGGAGTTCGACAGACGTGGAT<br>CGGTGAAAAGGCGTTCACGAAGCTATGCTCTGATGCGCAGTGGC<br>AATGAATCAGCCCTTAAGGGAATGATGGCAGCCTCGACCCGATG<br>GTTTATCACGCTTAATGAATGACATTCGACAGCCTTGGTGGCGAT<br>GGATTTATGAAGTTCGCAACCCATTTATCAGTAAAGATGCTTT<br>AGCCAAAATGACAATCACTCCGATAAACCCATTTTCAAAACGATA<br>TTTTGGATTGATGATAAACCGGCTCTGCGTCCAATGTTAGCCCCCT<br>TCTGTACACGGTATCGCTAGCCTGCGTGATCATCTGACGGCCCTG<br>TCAAAATTTTCGAAATGGGCTCTGTTTTCGCAAAGAAATCGCACAT<br>GGGATGCACCTGGAAAGGTTTACCATGTTAAACCTGGTAGATATGG<br>GCCCGCCGGGATGCCACTGAGTCCCTGAAAGAAATATAATGGGAT<br>CGTAATGAAGGCCCGGGCTGCTGACTACCAATAGTCCACGAG<br>GAATCTGATGTTGATAAAGAAACGATTTGATGTTGAATCAACGGC<br>AAGAGGTTTGTTCGGCTGCTGAGGCTCACTATTGGATGGCCG<br>CATCAAGCTGACAGCGCTGGCCAGGGCAGGGTTCGGCTGGAG<br>CGCTTCGTCGAATTCGCCAGGATATAGCAAGTATGAAGAAAGGG<br>GAGCTTCCAAACCTATTGAACGGGGCTAAGTAGACTAA      |
| <i>Thermoplasmatales</i><br><i>archaeon BRNA1</i>            | BRNA1   | (2018) Willis et al. <sup>10</sup> | MKYTDAQIQLREYNGNDYSGAEFDDASAR<br>DKAFSRDMSAATKDNKAIQAMFSPDRPA<br>LTRLMDIAAALAEFIEVIRTPIMIFKDALR<br>RMTITPGRPLYKQVFWIDDKRALRPLMAPSL<br>YSVMRSRLRHDITDGPVKIFEMGSCFRKESH<br>MHLEEFMLNLVDMGPNEDEIATLKKYIDV<br>VMKVGLNLYDLVQESDVYKETIDVEIN<br>QEVCSAAVPHYLDAADHVEHPWAGAGF<br>LERLLALREKYSTVRKAGASVSYLNAGAKIN              | ATGAAATACCGGATGCAAAATTCAGAAGCTCGCCGAAATACGGA<br>AACGGAGTACTCAGGAGCTGAGTTCGACGACGCTTCCTCGCG<br>ATAAAGCATTTTACCGGATATGTCAGCAGCCCAAGGACCAAGCA<br>GGTAAAGTCCAAAGCGATGTTTAAAGAACCGGACCGCTCAGCAT<br>ACTCGTCTGATGGCAGACATCGCCGACGCTTACAGCCGGATGTT<br>TTATCGAAGTACGTACCCGATTTATGATCAGGAAGTGTGATTA<br>CGCGATGACTATCACTCCAGGACGCTCGCTGATTAAGCAGGTTTCT<br>GGATTGACGACAACCGGCACTTCGCTCATATGCTGGCCTAGCTT<br>GTATTCAGTAATGCGTTCGCTGCTGATCATACTGACGGACCCGITA<br>AGATCTTGAATGGGCTTGGCTTTCGCGCGAATCACATTTCTGGG<br>ATGATTTAAGAGAGTTCAGATGCTTAACTTGGTTCGATATGGGGC<br>CGAATGAAGACGCGATTGAAACGTTGAAGAAATACATGACGTGGT<br>AATGAAGTGGTGGATTAGAGAATATGATTTAGTTCAAGAAGAG<br>AGCGACGCTATAAAGAAACGATTGACGTGGAGATCAATGGTCAAG<br>AAGTATGTTCCGACGAGTAGGCCGCACTATTTAGACGCTGCTCA<br>CGACGCTCATGAACCGTGGTCTGGGGCAGGCTTGGACTGGAACG<br>CTGTTAGCGTTCAGTGAGAAGTATAGCAGGTTCCGAAAGCGGGG<br>CATCTGCTCATACTTAAATGGGCAAAAATTAATTA           |
| <i>Methanogenic</i><br><i>archaeon ISO4-G1</i>               | G1      | (2018) Willis et al. <sup>10</sup> | MVVKFTDSQIQLMEYGDNDWSEAEFDDAA<br>ARDKEFSSQFSKLSANDKGLKDVIANPRND<br>LTDLENKIREKLAARGFIEVHTPIFVSKSALA<br>KMTTTEHPLFKQVFWIDDKRALRPMHAMN<br>LYKVMRELRDHTKGPVKIFEIGSCFRKESKSS<br>THLEEFMLNLVEMGPDGDMPEHLKMYIGD<br>IMDAGVVEYVTSRESVDVYETLDEVINGET<br>VASGAVGPHKLDPAHDVIEVWAGIGFLER<br>LLMLKNGKSNARKTKGSHYLNGLYKLD          | ATGGTGGTCAAGTTTACTGATCCCAAATTCACACCTTATGGAGTA<br>TGGCGATAATGATTGGTTCAGAGCCGAAATTCGAAGACGCTGCTGCA<br>CGCGACAAGAGGTTTCCAGTCAATTTCCAAACTGAAGTCTGCGAA<br>ATGATAAAGGGCTGAAAGACGTTATTTGCCAACCTCCGAAACGATTT<br>AACCGACCTTGAAACCAAGATCCGTTGAAAACTTCGACCGCGGCT<br>TTTTATGAGGTGACACTCCATCTTTGTTAGTAAAGTCAAGCTTAGC<br>GAAAAATGACTATTAACCGAGGACCCCGCTTTTAAAGCAAGTTTTT<br>GGATCGATGATAAACGCTGCTGCTGCGATGCTGATGATTAATCT<br>GTACAAAGTATGCGGAGTTACGGATCACACCAAGGCGCGGTT<br>AAGATTTTTAGATCGGTTCTGCTTTCGAAAGAGTCCAAGTATC<br>TACCATTTGGAGGAGTTTACAATGTTAAATCTGGTCAAAATGGG<br>CCAGCAGGGGATCTATGGAGCATCTTAAATGATACATGGGGACA<br>TCATGGACCGGTAGGCTTGAATACACGACCTCCCGGAAAGAAAG<br>TGATGATATGTTGAACCTTGGATGTTGAAATCAATGTTACAGAG<br>GTAGCCAGTGGCGCTGTCGGCCCCACAATAGACCCCGGACG<br>ACGTGATGAGCCTTGGCAGGATCGGTTTCGGGCTTAGCCGCTT<br>ACTTATGCTTAAAAATGGAAATCAAAATGGCGTAAAGCCGGAA<br>TCTATCACTTACTTAAACGGATACAAGTTAGACTAA        |
| <i>Methanogenic</i><br><i>archaeon ISO4-H5</i>               | H5      | (2018) Willis et al. <sup>10</sup> | MTCKLTDPOIQLREYHGEKPNSEFETEEE<br>RDKAFTKMSKQLRENEKGIKDMIANPRHH<br>RLMELEQLSEALKEGFIEVKTPHLSKAELA<br>KMTIDENHPLYQVFWVDDKRLRPMHAIN<br>LYNIMRELHRTDGPVKIFEIGSCFRAESHSN                                                                                                                                                  | ATGACTTGAAATGACAGACCTCAGATTACAGGCTTCTGAGTGA<br>TGGCCACGAAACCAAGAACGAGTCAAGATTTGAAACCGGAAGAGGA<br>ACGTTGATAAAGCGTTTACGAAATGATGTTCAAAGTTCACACGGGAA<br>AACGAAAGGGGATTCGCGACATGATGCTAATCCACCGCATCATC<br>GCTGATGGAATGGAGTTACAATATCCCGAAGCATATCAAGGA                                                                                                                                                                                                                                                                                                                                                                                                                                                                                                                                                                                                                                                   |

|                                               |         |                                    |                                                                                                                                                                                                                                                                                                         |                                                                                                                                                                                                                                                                                                                                                                                                                                                                                                                                                                                                                                                                                                                                                                                                                                                                                                                                                                                                                                                                                                                                                                                                                                                                                                                                                                                                                                                                                                                                                 |
|-----------------------------------------------|---------|------------------------------------|---------------------------------------------------------------------------------------------------------------------------------------------------------------------------------------------------------------------------------------------------------------------------------------------------------|-------------------------------------------------------------------------------------------------------------------------------------------------------------------------------------------------------------------------------------------------------------------------------------------------------------------------------------------------------------------------------------------------------------------------------------------------------------------------------------------------------------------------------------------------------------------------------------------------------------------------------------------------------------------------------------------------------------------------------------------------------------------------------------------------------------------------------------------------------------------------------------------------------------------------------------------------------------------------------------------------------------------------------------------------------------------------------------------------------------------------------------------------------------------------------------------------------------------------------------------------------------------------------------------------------------------------------------------------------------------------------------------------------------------------------------------------------------------------------------------------------------------------------------------------|
|                                               |         |                                    | DHLEEFMLNLVDMGPQDTEKIKHYDIV<br>MKTIGLDYELVHEESDVKETIDVEVDGEEV<br>CSAAVGHYLDKAHNINEPWCGAGFLERLI<br>MMRDGDGSKVTKGKSVNLYNGYKIN                                                                                                                                                                             | GGGCTTCATTGAAGTAAAGACTCCTATCCTTATCTCGAAAGCCGGC<br>CTTGCGAAAATGACTATCGATGAGAATACCCCTTATACCGCAAG<br>TATTCTGGGTGGACGCAAAACGCTGCCTCTGCCTATGACCGCAATT<br>AACCTGTATAACATCATCGTGAACCTGCTGGCCATACCGATGGCC<br>CCGTGAAATCTTTGAAATTTGGTCTGTGTTCCGTGGCGGAATCGCAC<br>TCCAATGACCAATTTAGAGGAGTTTACAATGCTTAACTGGTTGACAT<br>GGGCCCAAGGTGACACAACCTGAGAAAATCAAACTACATTTGAT<br>ATTGTAATGAAAATCTTTGGTTGGATTATGAGCTGGTACATGAAG<br>AATCTGATGTGATAAAGGAAAATTTGATGTGGAGGTAGACGGAGA<br>AGAGGCTGTTCGGCTGTGTGGGCCCTCATTACTTGGATAAGGCTC<br>ACAATATTAAACGAACTTGTGTGGAGCAGGTTGGCTTAGAGCG<br>CCTTATCATGATCGGTGACGGTGTGTGTAGTAAAGAAAACCTGGG<br>AAGTCAGTTAACTTCTAACCGTTCAAAAATCAACTAA<br>ATGACTTTGAGTGGACGCAAGCCGAAACAGCGCTTAAAGAAT<br>TAGGGATCGATTACAGTACAGATTATACCATCAATAACATCCAGGA<br>GGTGGAGGAGGTTTTTCGGCCCTGGTAAACCGCCGCAACCTAGAA<br>GGTGTCTGTCAATCCGCTCATGATGGAACACCTGCGCTTACA<br>AACTGGCCAGTGGAAACAGGACCTGGCGAAGCTTTGGTGTGATG<br>CGGCTTCTGGAAATTCGCACGCCAATCATTTACCCGCGAGTGT<br>TGGAAAAAATGGGCAATTTGGTGTGAGCCTCCCTTACGAAACGAT<br>TTTTGGTTAGACGAGAAGCGTGTGCTGTGCTCAATGCTTCCGCCC<br>ACTTGTATTACGTTATGCGCCACTTGAAGCGTAACCGGAAGGGTCC<br>CGTCAAGTTATTGAGTACGCGACCTGTACCGCAAGAAAGTAC<br>GGTGTCAACATCTGGAGAATTTACATGTTGAATCTTGTAGAAT<br>TGGACCCAGTGGGGATGCCCGCAACAATTACGCAACACATTT<br>CACTATTATGAATACGATCGGTTTACGACGAGTGTAGTGTGCT<br>CGTGGACGTTTACGTTGAACTACGGACGTAGAAGTCAATGGCGT<br>AGAAGTACGAGCGGTGCTATTGGGCCCAATAAATAGATCTCGG<br>CATGGCATTAAAGCTCCTTGGGACGGTGGGTTTGGTTTGGAGC<br>GTTTATTAAATGTTAAAGCAGCGGAGGATAACGTAATAAAGAAATGAG<br>CCGCTCGTTAAATTTACTGCAAGGTGTCGGCTGGACATCTAA |
| <i>Methanossilicoccales archaeon RumEn MI</i> | RumEn   | (2018) Willis et al. <sup>10</sup> | MTIEWTPSQRLKELGDSDDYDYNINIOER<br>EEVFSRLVTRRQSGERRAIRSMMEHPVRHL<br>AQLQDLAQAALVDDGFLFERTPIIHSRALEK<br>MGIGREHPLHEQVFWLDEKRLRPLMAPNL<br>YYVMRHLKRNKAKGPKVLFEGTCYRKESHG<br>SNHLEFTMLNLVELDPAGDARELQRKHIST<br>MNTIGLDYELVSCSDVYVETDVEVNGVE<br>VASGAIQPHKLDPAHGKAPWAGVGFGLERL<br>LMLKHGEDNVKVKGRSLYLQGVRLDI | ATGAGTATTGGTTTTACTCGCTCAAAATCCAGAAAGCTTCGTAATT<br>CGCGGAGGACCCCGGCAATAGTACCTACCAAAAGCTGAGAACA<br>GGCGGATAAAGCATTTTCAAACATGATGTCAGATTAGTCTTCTTA<br>ATGAAAAGGAAATGCTGGTATGTTGCGCTCCGCTCCCACTCA<br>GTTGGCAGCGCTTGAAGAGGATTTAGCGGGCGCACTGTTGACCG<br>GGGTTTATTGAGTTAAACACCCGCTTCTGTCAGTGTGGGTCT<br>TGGAGAAGATGACAACTCCGCAACATCCATTGTACAACACGTT<br>TTTTGATCGAAGCAAAAGGTTGCTGCTGCAATGCAATGATG<br>ACCTGTATTGTAATGCGCAAGTTGGCGCTACTAGTATGAGCC<br>CGTCAAGTTATTGAGATTGGTTCGTTTTCTGTAAGAAGGCATA<br>GTGGTAGCCACTTGGAGGAGTTTACCATTGCTTAACTTGGTGA<br>GGGCTGAGGGCGACCTACGGAGGCTTAAAGACACATCGGG<br>GCTGTATGAAAGTCACTGGACTGGAATACACGCTGGTTCGTGAGG<br>AGAGTGACGTTTACGTAGAACCCTGGACGTAGAGATCGACGGAG<br>GCGAAGTCCGACGGGGCGTGGGTCGCGATGTTTGTATATGTC<br>ACATGACATCCATGAAACCGTGGAGTGGGATGTTGGATGTA<br>CGTTTTAAATGATTATGAACGAGAAGAGTACGTTGAAAAGAGT<br>GCCGTAGTCTGTACTTAAATGGTGCTAAGTCAATTA                                                                                                                                                                                                                                                                                                                                                                                                                                                                                                                                                                                                                                                                               |
| <i>Methanoplasma termitum</i>                 | Term    | (2018) Willis et al. <sup>10</sup> | MSIGFTPSQIKLREFGEDPRDSTYQNVQER<br>DKAFSKLMSDLVSSNEKEIAGMLRSPRHQL<br>AALEEDLAAALIAARGFIEVTPAFVSVASLEK<br>MTTPEHLYKQVFMIDDKRCLRPMHAMNL<br>YYVMRHLRHDHDPVQKFIKSGFRKESHG<br>SHLEEFMLNLVELGPGDATEALKDHIGAV<br>MKVTGLEYTLVREESDVKVETLDVDEIDGGE<br>VASGAVGPHVLDNAHDHHPWSGIGFLERL<br>LMIMNEKSTVKKTRSLYLNGAKIN   | ATGAGTATTGGTTTTACTCGCTCAAAATCCAGAAAGCTTCGTAATT<br>CGCGGAGGACCCCGGCAATAGTACCTACCAAAAGCTGAGAACA<br>GGCGGATAAAGCATTTTCAAACATGATGTCAGATTAGTCTTCTTA<br>ATGAAAAGGAAATGCTGGTATGTTGCGCTCCGCTCCCACTCA<br>GTTGGCAGCGCTTGAAGAGGATTTAGCGGGCGCACTGTTGACCG<br>GGGTTTATTGAGTTAAACACCCGCTTCTGTCAGTGTGGGTCT<br>TGGAGAAGATGACAACTCCGCAACATCCATTGTACAACACGTT<br>TTTTGATCGAAGCAAAAGGTTGCTGCTGCAATGCAATGATG<br>ACCTGTATTGTAATGCGCAAGTTGGCGCTACTAGTATGAGCC<br>CGTCAAGTTATTGAGATTGGTTCGTTTTCTGTAAGAAGGCATA<br>GTGGTAGCCACTTGGAGGAGTTTACCATTGCTTAACTTGGTGA<br>GGGCTGAGGGCGACCTACGGAGGCTTAAAGACACATCGGG<br>GCTGTATGAAAGTCACTGGACTGGAATACACGCTGGTTCGTGAGG<br>AGAGTGACGTTTACGTAGAACCCTGGACGTAGAGATCGACGGAG<br>GCGAAGTCCGACGGGGCGTGGGTCGCGATGTTTGTATATGTC<br>ACATGACATCCATGAAACCGTGGAGTGGGATGTTGGATGTA<br>CGTTTTAAATGATTATGAACGAGAAGAGTACGTTGAAAAGAGT<br>GCCGTAGTCTGTACTTAAATGGTGCTAAGTCAATTA                                                                                                                                                                                                                                                                                                                                                                                                                                                                                                                                                                                                                                                                               |
| <i>Methanohalarchaeum thermophilum</i>        | Therm 1 | (2018) Willis et al. <sup>10</sup> | MELTRSOSQRLRELGYQGEAPTDFEDQERDE<br>FFERKETELOKKNRNFKFLQRINPDWKKT<br>EQLRKLNLYESDFTEVQPHIISVLNKMK<br>NISEESINYQVYKLDENGNKLRPMLAPNLYR<br>QMKHFLRISKKDVVKLFELGTCFRKEQGGK<br>HVREFKMLNAVEVGEIKDKRKTREMIIEI<br>GNLVYKIEEEKSTVYKGLDIEVNGLEIASS<br>VIGPHPLDANFSINKPWIGIGVERLIQTNE<br>GNSIKSYARSLYQDGRILEIN     | ATGGAATTGACAGCAGCAAAAGTCAACGTTTGGCTGAGTTGGGAT<br>ACCAAGGAGAGGGCCCACTTGGAGGACAGGAAGAGCCGCGAT<br>AGTTTTTGAACGTAAGAAGAACAGAAATACAAAAGGACCGTAA<br>TAAGTTTAAAAAATCTGACGCATCAATGAGCTGACGTGGAAGAG<br>ACGGAGCAAAAATTCGCAAGAACTTACGAGTCAAGTTTACCGG<br>AAGTTCAAAACACATATTATCGATGAGTGTATGAAAATAA<br>AATGAACATTTCCGAGGAATCGCAACTTATAAATACTCAAAA<br>CTGGACGAAGGAAACAGTGCCTGCGTCCATGTTAGCTCCCAAT<br>TTATCGTCAGATGAAACACTTCTTCTGATTTTCAAGGAAAGTGA<br>GTTAAATATTGAGCTGGGAATGCTTCCGCAAGGAAACAGGGA<br>AAAACACGTTCTGTAATTTAAGATGTTAAATGCAAGTGGAGTTGG<br>AGAGATCAAGGATAAGGAGAAGCGTACACGTGAGATGATTGATGA<br>AATATCGCAATCTTGTAGACTATAAGATTGAGGAAGAAAAAGT<br>ACAGTCTATGGCAAACTTAGACATCGAGGTAACCGGACTGGAAA<br>TGCCTCACAGACTCGGATCGCATCGCATCGGCTTGGCGCTTGA<br>TTCAGACGAAGACGAGGGAATTTATTAAGATTGATGCTGCTT<br>GTTGAGTTACACGAGCGGTATTCGCTTGAATCAATTA                                                                                                                                                                                                                                                                                                                                                                                                                                                                                                                                                                                                                                                                                                                         |
| <i>Methanohalarchaeum thermophilum</i>        | Therm 2 | (2018) Willis et al. <sup>10</sup> | MEFTETQKQRLRELGYQGEAPLDTKEEVNE<br>AYSQLEKLRKRRKLNDFESKPKPWKN<br>TVENIRONQLDGFIEVQIPLIISNKLKMKI<br>DQKSDLMNQVYRINDNKLRLMQLNLYK<br>ELENFSKLSNRDTIQLFEIGTCFRKEKGGKDH<br>LNEFKMLNAVELGNFKDKRLEKIVESTLKF<br>DFEYVLEKEKSTVYGETYDVLVNGTELAS<br>CAIGHPLDQKEDINRPNWIGIGVERLITREL<br>NNSDSTVKAYGRSFVQDGRILDK      | ATGGAAGTTACAGAAACCAGCAAGCTTACAGGAGCTTGGT<br>TTGAAGGTGATTTCCCTCGGACTTCGAGGATGTTGATGAGCGTAA<br>CCGTTTTCTTGAAGAGTTAGTGGCCGCTTACGTCAGCGTAAACCGGA<br>AACGCTTGGAGCGCTTGGTGGAAATAAATCCCTTCTTGGCGTAA<br>AGTGTCTTGGGACCTTCTGTAATCGCTTCTATGAAATTTGTTTGTG<br>AAGTTCGTACCCCGGAGATCATCTACATACAGCTTACTTGGAAAAAT<br>GGAAAATTCAGAGGATTTAGTGAACAAGTCTATTGGCTTGAAGAA<br>GATAATGCTTCTGAGTCCAAATGTTAGCGGCAATCTTCAACGA<br>ATTGGCTCACTTAAACGATCTCAATCAATCAACGAGTGTGATCT<br>TCGAAATCGGGACTGTTTCCGCTGAGAGAGCTATCCGAGCA<br>CCTGAACGAGTTTACGATGCTGAATGCGGTTGAAATGGGTGACAT<br>GGGACACGGAAGAAGCCCTGGACCGCTTAAATCGAAGGTTCTCG<br>GTGAATTTACAGACTACAAGAAGTTGGGGAAGAGTCAAGTTTGA<br>TGGAAAAACGGTTGACGTGTTGGTGTGACGCGCTGGAAGTGGCTCC<br>TGTATTGCGGACCCACCTCTTGGACTCGAAGTGGTGTGATGATCA<br>ACCTTGGTGGGATCGGCTGGGTGGAGCGTTAGGAATGTTA<br>CTGGACGATGGAAGTACCGCTAAGGCTTATGCAATTTGATATTT<br>ATCAGGATGGTGTACGTTGATCAATAA                                                                                                                                                                                                                                                                                                                                                                                                                                                                                                                                                                                                                                                                   |
| <i>Methanonatronarchaeum thermophilum</i>     | Tron    | (2018) Willis et al. <sup>10</sup> | MEFTVTQKQRLQELGFEVFPDFEDVDVERN<br>RFEEELVGLRDRNRKRFERLVGNKPIFWRK<br>VSSDLNRNRYELGFVEVTRPEIISYSLLEKMEI<br>SDDLREQVYWLEEDNRLRPLMAPNLYNEL<br>RHFNRISNQSQRVFEIGTCFRKESSEHLNE<br>FTMLNAVEMGIDGITEERLDRLEEVFGEFT<br>DYKKVGEESLYGKTVYDVLVDGVEVASCIA<br>GPHPLDSNWSDQVWVGLGLOVERLAMLLD<br>DGSTAKAYGNSYVQDGRILDK  | ATGGAAGTTACAGGAGTACCGGAGCAAGCTTACAGGAGCTTGGT<br>TTGAAGGTGATTTCCCTCGGACTTCGAGGATGTTGATGAGCGTAA<br>CCGTTTTCTTGAAGAGTTAGTGGCCGCTTACGTCAGCGTAAACCGGA<br>AACGCTTGGAGCGCTTGGTGGAAATAAATCCCTTCTTGGCGTAA<br>AGTGTCTTGGGACCTTCTGTAATCGCTTCTATGAAATTTGTTTGTG<br>AAGTTCGTACCCCGGAGATCATCTACATACAGCTTACTTGGAAAAAT<br>GGAAAATTCAGAGGATTTAGTGAACAAGTCTATTGGCTTGAAGAA<br>GATAATGCTTCTGAGTCCAAATGTTAGCGGCAATCTTCAACGA<br>ATTGGCTCACTTAAACGATCTCAATCAATCAACGAGTGTGATCT<br>TCGAAATCGGGACTGTTTCCGCTGAGAGAGCTATCCGAGCA<br>CCTGAACGAGTTTACGATGCTGAATGCGGTTGAAATGGGTGACAT<br>GGGACACGGAAGAAGCCCTGGACCGCTTAAATCGAAGGTTCTCG<br>GTGAATTTACAGACTACAAGAAGTTGGGGAAGAGTCAAGTTTGA<br>TGGAAAAACGGTTGACGTGTTGGTGTGACGCGCTGGAAGTGGCTCC<br>TGTATTGCGGACCCACCTCTTGGACTCGAAGTGGTGTGATGATCA<br>ACCTTGGTGGGATCGGCTGGGTGGAGCGTTAGGAATGTTA<br>CTGGACGATGGAAGTACCGCTAAGGCTTATGCAATTTGATATTT<br>ATCAGGATGGTGTACGTTGATCAATAA                                                                                                                                                                                                                                                                                                                                                                                                                                                                                                                                                                                                                                                               |
| <i>MSBLI archaeon SCGC-AAA382.20</i>          | SCGC    | (2018) Willis et al. <sup>10</sup> | MNLTSSQKQRLRELWGDGIPDFDNKKERD<br>QFNKATATLKNRKNRFLKLENKPSVWR<br>RVERKLRNRYELGFVEVQTPSIHSLLEKMD<br>IGEEKLNYQVYQIKGEKSLRPLMAPNLYRE<br>LRYFSRISDEEVIRLFEIGSFRKENGGERHL<br>NEFKMLNAVEGNKIDTKRRLDELISNVFSP<br>FANYKVEKEKSTVYETVDVNIKNTVEVASC<br>VIGPHFLDSNWHIDPEWVGLGIGVERLITRVIE<br>GEPVSKPFGKSYVQDGRILDIE  | ATGAACTTGGAGGACTCAGAAACACGCTTGGCGGAGTTAGGTT<br>GGGACGGTCAATCCGACTTCGCAATAAAAAAGAGCGGACCC<br>AGTCTTCAATAAAACCTGCAACAAAATTAATAAACCTGATAAAGA<br>ACGCTTTTGAAGCTTCTGGAAAACAGGTCGAATTTGGGCTCGC<br>GTGGAAACGCAAGTTGCGTAACATTTTCTACGAGCTGGGCTTCTGG<br>AGGTACAACTCCATCGATTATTTCCCGAGTTTACTGGAAAAAAT<br>GGATATTGGTGGGAATCTAAGTTATAAACCAGATTACAGCAAT<br>AAAGGGGAAAAAAGAGTCTGCGCCCATGCTGGCCCAACTTAT<br>ATCGTGAACCTCGTATTTCAGTCCGATTTCGGCAAGAGGTTGAT                                                                                                                                                                                                                                                                                                                                                                                                                                                                                                                                                                                                                                                                                                                                                                                                                                                                                                                                                                                                                                                                                                         |

|                                            |       |                                    |                                                                                                                                                                                                                                                                                                                                           |                                                                                                                                                                                                                                                                                                                                                                                                                                                                                                                                                                                                                                                                                                                                                                                                                                                                                                                                                                     |
|--------------------------------------------|-------|------------------------------------|-------------------------------------------------------------------------------------------------------------------------------------------------------------------------------------------------------------------------------------------------------------------------------------------------------------------------------------------|---------------------------------------------------------------------------------------------------------------------------------------------------------------------------------------------------------------------------------------------------------------------------------------------------------------------------------------------------------------------------------------------------------------------------------------------------------------------------------------------------------------------------------------------------------------------------------------------------------------------------------------------------------------------------------------------------------------------------------------------------------------------------------------------------------------------------------------------------------------------------------------------------------------------------------------------------------------------|
|                                            |       |                                    |                                                                                                                                                                                                                                                                                                                                           | CGTTTGTGAATTGGGATCCTGTTCCGTAAGGAGAATTGGCGGTGA<br>GCGCCATCTTAACGAGTTCAAGATGTTAAACCGGTGGAATGGGC<br>AATATCAAGGATCTAAGAAGCGTTTGGATGAGTTAATACGCAACG<br>TCTTTTCCGTTTGCTAATTATAAGGTAGAAAAAGAAAAATCAAC<br>AGTGTATGAGGAAACCGTAGACGTAACATCAAAAAACACAGAGGT<br>CGTTCCTGCGTCAITGGTCCGACTTCTGGATTCAAACTGGCATA<br>TCGATGAACCTTGGGTAGGCTTGGCATCGGTTAGAGCGTTTGAC<br>GCGGTAATTGAAGGTGAACCATCGTTTAAACCATTCGCAAGAGT<br>TATGTTACCAGGATGGGATCCGCTTGACATTGAGTAA                                                                                                                                                                                                                                                                                                                                                                                                                                                                                                                            |
| <i>Methemicoccus shengliensis</i>          | Sheng | (2018) Willis et al. <sup>10</sup> | MIGFTDTQVQRLKELGGDQKIVGCRFSSVAD<br>RDEVFETVKNLVEENREKLRRMAHSPSRCS<br>LFELEDRLASTLVGMGFMEVATPMLLSASNL<br>KKMGIDESHPLWEQVFWVDKRCRMRPMLA<br>PNLYFLKHLKRNKPKVRIEIGPCFRKESQ<br>GSRHLEEFMLNLVLELAPDCEPTELRIELIEK<br>VMGQIGLEYRLKNESSEVYGNITVDVVEVDGV<br>EYASGAVGPHFLDYGITDVAWVGVGFLG<br>RLLMVMEGHSNIRKVRGSLVLYNGARIDI                           | ATGATGGGTTACCAGCACCCAGGTACAGCGCCTGAAAGAGCTGG<br>GCGGACCAAAAGATCGTGGGGTGGCCGCTTCTCTCAGTGGCTGA<br>CCGTGACGAAAGTTTTCGAGACTACAGTCAAAAAAATCTGGTCAGGAG<br>AACCGCAAAAGCTGCGCGCATGGCCATTCGCTCTCTGTTGCTC<br>TTGTTTGAATTGGAAAGCCGCTGGCCCTTACTCTTGTGGGATGG<br>GCTTATGGAAGTTCGCGACACCAATGTTAATAAGCCGAGTAACT<br>TAAAAGATGGGTATCGATGAATACATCCCTTGGGGAGCAAGTT<br>TTTTGGTTCGATAAGAAACCGTGCATCGCTCCGATCGGCTECCA<br>ATTTGFACTTCTTATAAGCATCTTAAGCGCAACATTAAGAAACCA<br>GTGCGTATTTTGGATCGGTCATGTTTTCGAAAGACTCACAGGG<br>CAGTCCCACTTAGAGGAGTTAACAATGCTGAATCTGGTCCAGTTG<br>GCTCTGATTGCGAACCGACTGAACCGCTGACGGAAGTGAITGAGA<br>AGGTTATGGGCAAAATGGATTGGAATACCGTGAAGAAATGAGTC<br>GTCCGAGGTATATGGAACACCGTGCATGATGAGGTTGATGGCGTT<br>GAAGTGCCTCGGAGCCGCTCGTCTCATTCTCGGATGGAGCGT<br>ATGGAATCACAGATGCTGGGTGGGGTGGGTTTGGCTTGGAAAGC<br>CTACTATGGTATGAGGCTTCTAACATTCGTAAGTGGGCT<br>GCAGCCTGTATATTGAAATGGGGCTCGATTGACATTA                                                                                 |
| <i>Methanomethylophilus alvus</i>          | Alv   | (2014) Borrel et al. <sup>11</sup> | MTVKYTDQIQRLREYNGTYEQKFEDLA<br>SRDAAFSKEMSVASTDNEKKIKGMIANPSRH<br>GLTQLMNDIADALVAEGFIEVVRTPIFISKDAL<br>ARMTTTEDEKPLFKQVFWIDEKRALRPLAPN<br>LYSVMRDLRDLHTDGPVKIFEMGSCFRKESH<br>GMHLEEFMLNLVDMGPRGDATVLEKNYIS<br>VVMKAAGLPDYDLVQEESSDVKETIDVEIN<br>GQEVCSAAVPHYLDAAHVDVHPWSGAGF<br>GLERLLTIREKYTVKKGASISYVNGAKIN                             | ATGACGGTGAATACACAGACCGCAGATCAGCGTTTACGGGAT<br>ATGGAATGGGACTTACGAACAGAAGTCTTGGAGGATCTGGCGAG<br>TCGTGATGACGCGTTTCAAAGAGATGTCCTGGTCTACCGAT<br>AATGAGAAGAAAAAAGGATGATCGCGCAACCCGATCGCTCATG<br>GGGTGACCAATAATGAATGACATTGGGATGGCTGGTCCGCAAG<br>GGGTTTTATCGAAGTGGCCTCAACTTTTCTAAGGATGCTT<br>TGCCAGCATGACCATCACCGAGGCAAAACCTTATTAACACGTT<br>TTTTGGATCGACGAAAAACGTGCTTACGCCCAATGGGCTCA<br>AACCTGTATAGTGTACGCTGATCTTCCGATACACAGATGGCC<br>CTGTTAAGATTTTGGATGGGATCTGTTTTCGTAAGGAGTCAAT<br>TCTGGATGATCTGGAAGAGTTTACGATGCTTAACTGGTCCGAT<br>GGGCGCTCGCGGACCGGACTGAGTATGGAAGATACATTAGC<br>GTAGTTATGAAGGACCGCGGCTTCCGACTATGACTTGGTCAAG<br>AAGAGTGGATGATATAAGAAACTATCGATGTTGAGATCAAGCG<br>ACAAGAAAGTTGACGCGGCGGATAGTCCCACTTACCTGAGTCC<br>GCTCAGATGTTACGAGCCTTGGAGCGGCGGGTTTCCGCTTG<br>AACGCTTTAACTATCCGCGAGAAATATCCACCTGAAAGAGGG<br>CGGCGGCACTTCTATCGAATGGGGCAAAATAATTA                                                                                                               |
| <i>Methanomassiliicoccus intestinalis</i>  | Int   | (2014) Borrel et al. <sup>11</sup> | MPVEWTAQKQRLKELGPAEADRFNDTKE<br>REEVFKDTISEHLKVRKDKHMLDYPHERHQ<br>LSQIESILAAQALVDNGFIEVKTPSIIRSALAK<br>MGIDRSHLPEQVFWLDEKRLRPLAPNL<br>YFMRMRHYRYSKGLRLEFEGCFRKEKSGS<br>NHLEEFMLNLVEMAPNDPDLQVHLIKTI<br>MDALGLEYSLEVEDSDVYKTLVDVEIDGVE<br>VASGAVGPHKLDPAHGITSQWAGVGVGLER<br>LSMMKYGMDNKKSGRSLYLVRGRLDI                                     | ATGCGGTCGAGTGGCCGATCTCAGAAACAGCGCCTTAAAGAAC<br>TTGGGATCTCGCGGAAGCTGACCGCATTTTCAATGATACGAAGA<br>ACGTTGAAGAGTCTTAAAGATATACATCGGAACACTTAAGATA<br>GTGCGTAAGGATATTAACATATGTTGGACTTCTGACGATCAT<br>AGTTGTCCAAATCGATCGATCTTGGCAACGCTTGGTATGATA<br>CGGTTTCTGAGGTTAAGACACCTCGATCATAGCCCTGAGCCGAT<br>TGGAAAAGATGGGAATCGACCGTATCATCTTACGCAAGCAAGT<br>TTTTGGTGGAGCAAAACGCTGTTTGGCTCGGATGTTAGCCCGA<br>ACGTGATCTTATGATGCGTACATGACCTTACAGTAAGGCGCCG<br>TTGCGCTGTTGAGATCGGCTCTGTTTCCGAAAGAGAGTAAGG<br>GATCGAATCATTGGAGGAATTTACTATGTTGAACTGGTGGAGAT<br>GGTCCAGACAACGATCGCGGACGCAACTTTTACTGATATCAAA<br>ACAATCATGGATGCCCTTGGATTGAATACTCATTTGGTGAATGG<br>AATCAGATGTTATGTCAAAACCTTGGATGTTAAATCGACGGTGT<br>GAGTGCCTGTTGGTGGTGGGCCCCATAAATGGACCCGAC<br>ACGGAATCACAAAGTTGGGAGGAGTGGGTTTGGGCTGAGCG<br>CTTGCTATGATGAAGTACGTTATGGACAACATCAAAAAGAGTGG<br>CGCTCTTACTTCTGCTGGAGTACGCTTGATATTA                                                                                                      |
| <i>Methanomassiliicoccus luminyensis 1</i> | Lum1  | (2014) Borrel et al. <sup>11</sup> | MDTRLTPAQQRIREMGGTVDPSLAFSSAE<br>RESAFQRISADLQGANLAKIRRCAPERHPI<br>GSENTLACALAAKGFIEVKTPMMIPADGLV<br>KMGIDESHPLWVQVFWGPKALRPLAP<br>NLYFLMRHLRSPAPLILFEIGPCFRKESRG<br>SNHLEEFMLNLVLELAPQADATERLKEHIAT<br>VMNAVGLPYELVVEGSEVYGNITVDVVEVDGV<br>ELASGAVGPHKLDPAHGITSQWAGVGVGLER<br>RLMRTEQNIKKVGRSLVLYNGARIDI                                 | ATGGATACACGCTGACCGCCGCAAGCTCAGCGCATCTGTGAAA<br>TGGGGGGGAGGATGACCGCTGTTAGCCTTAGCAGCAAGGCGG<br>ACGTGAATCGGATTTACGCTATTTCGGCAGATTTCAGGGGGCG<br>AACTTGGCAAGATGCTGCTGCTGTAAGCTGACGAGCGCAT<br>CAATCGTAGTTCGGAATAACCTTGGCTGCGCATGCGGCTAA<br>GGGTTTTATTGAGGTTAAGACCGGATGATGATCTGCGAGATCA<br>CTGGTGAATAAGGATGACGAGTCTTCAATATGGAATCAAG<br>TTTTTGGGTCGCGCAAAAAGACTGCTCCGATCTGTGCTGCTCA<br>AACCTGTACTTTTGTGCGCACTTACGCTGTTGCTGCGCCGCT<br>ATTACTTCTTTGAAATGGACCTTGTTCGCAAGGAGGCGCGG<br>GGTCAATCATGAGGAGGTTACTATGTTGAACTTAGTCCAGITTA<br>GCTCCAAAGCTGACGCTACAGAAGCTTAAAGAACACATTTGCA<br>CAGTATGATGCTGTTGGACTGCTACGAGTATGATGAGGAGG<br>TCTGAAAGTTATGGCACTACGATGATGGAAGTAGACGGTGT<br>GAGTGGCATCTGCGCAGTAGGACCGTACTATGGAATAAACCT<br>ACGGGATACCGAGCCCTGGGCTGGTGTGGGTTGGATGGAGCG<br>TATTGATTAATGCGCAGAGGCAAAAATCAAAAAGATAGG<br>ACGCTCTTGGTATTGTTAATGGAGCCGATGATTA                                                                                                                        |
| <i>Methanomassiliicoccus luminyensis 2</i> | Lum2  | (2014) Borrel et al. <sup>11</sup> | MVRDRQASTAAGFDSRALRSQHYSEEDG<br>GWQLFDMTPSQQRLELGRVDEGAFAST<br>AEDRDAAFIEKAYQSYNRRVVDALDAP<br>KRHPLSHMEEVLAQALVDEGLDVKTPHIS<br>GDSIRKMGISCAHPLNKQIFWVDGTRCLRPM<br>LAPNLYFLMRHLKRNQALRLEFIEGPCYRIE<br>THGSDHLEEFMLNLVLELAPQDPLAQLHH<br>HIATVMGAVGLDYQLCECDSEVYSRTIDVVE<br>DGEVSAALGPHALDRGHIEDPWVGVGLER<br>LMSKSAESNIRKVRGSLYLQGARIDI      | ATGGTGGCGGATCGTACGCAATCAACCGTACTGCTGAGGATTTG<br>ATAGTCCGCAATGCGCAGCCAGCATACGAATCTGAAAGTGGAG<br>CTGGAGCTTATTTTCGATGACCCCTTCCGAAAAACAGCTGCTG<br>GTGAGCTGGGGCGTGTCCAGACGAGGGCGGCGCTCAGTACCGC<br>CGAAGACCGTGACGAGCTTATCAAGAGGTGGCTCATATCA<br>TCGTACAACCGTAAATGTTGGTGGTACGACTGACGCCCGAAG<br>GTACCCCTTTCACATATGAGGAGGATTTGGCCAGGCTTATGATG<br>GATGAAGGCTTTTGGATGTAAGACCCGCAAAATATCTGCTGGG<br>ACAGTATCCGCAAGTGGGAATCAGTGGCGACACCCCTGAAATA<br>GCAAAATTTTGGGTTGATGGGACCGTGTTTACGTCGATGTTG<br>CTCCCACTGTTACTTCTGATGGCTATTGAGCGCAACGACGAG<br>TTACGCTTACCTGCTGATGATGAGCTTACCGATGATGAAATGG<br>TCACGGTAGTGAACACTTGGAGAAATACGATGTTAATTTGGT<br>GAGTTGGCCCGCAAGGAGTCCATTAGCTCAACTTATCACCACA<br>TCGCACTGTAATGGGGCGCTCGCTTGTGATATCAGCTTGTGAG<br>TGGCACAGGAAAGTACAGCCGACCATGACGTTGAAGTGGAG<br>GGAGTAGGCTCGCTTCCGCGCTTGGTCCGACCGCTTATAGTCG<br>CGCACGATGATGAAGACCTTGGTGGGTTGGGTTGGGCTGCGGCT<br>GAGCGCTTATGATGTCAAATCAGTGAATCCAATCCAATCCCAAG<br>TAGGACGATGCTTACTTGCAGGGGCGGATCGAGCTGTA<br>A |
| <i>Methanosarcina mazei</i>                | Mm    | (2005) Krzycki <sup>12</sup>       | MDKPLNLTISATGLWMSRTGTHHKHHEV<br>SRKIYIEMACGDHLVNNRRSRTARALRH<br>HKYRKTCKRVSDEDLNFKLTKANEDQTS<br>VKVVKVSAPTRTKAMPKSVARAPKPLENT<br>EAAQAQPSGSKFPAIPVSTQESVSPASVST<br>SISSTIGATASALVKNNTNPTSMSAPVQAS<br>APALTKSQDTRLEVLNPKDEISLNSGKPFRE<br>LESELLSRKDKLQIYAEERENYGLKLEREI<br>TRFFVDRGFLEIKSIPLEIYERMGIDNDTEL<br>SKQIFRVDKNFLRPLAPNLYLQGARIDI | ATGGACAAAAACCGCTGAACCCCTGATCTGCTACCGCTGTT<br>GGATGCTGCTACCGGATACATCCAAAAATCAACACAGGATG<br>TTCTGCTTCAAAATCTACATCGAAATGGCTTGGGTTGACCCG<br>TTGTTAAACAACTCTGTTCTCTGCTACCGCTGCTGCTGCTGCT<br>ACAAATACCGTAAACCTGCAACCGTGGCTGTTTTCGCAAGAA<br>CTGAAACAAATCTGACCAAAAGTCAACGAGACCAAGCTTCTG<br>AAAGTAAAGTGTGTTGCTCCGACCCGACCAAAAAGTATGCG<br>CGAAATCTGTTGCTGCTGCTGCGAAACCGTGGAAACACGAG<br>TGCTAGGCTCAGCGCTGGTCTAAATCTCTCCGCTTACCCGCT<br>TTTCTACCGAAGATCTGTTCTGCTGCGGCTTCTGTTCTACCT                                                                                                                                                                                                                                                                                                                                                                                                                                                                                               |

LPDPKIFEIGPCYRKESDGEHLEEFMLNFC  
QMSGGTRENLESIITDFLNHLGIDFKIVGDS  
CMVYGDLDVMHGDLLESAVVGPIPLDRE  
WGIDKPWIGAGFLERLLKVKHDFKNIKRA  
ARSESYNGISTNL

TCTCTTCTATCTCTACCGGTGCTACCGCTTCTGCTCTGGTTAAAGGT  
AACACCAACCGATCACCTCTATGTCTGCCGGTTCAGGCTTCTGC  
TCCGGCTCTGACCAATCTCAGACCGACCGTCTGGAAGTCTCTGTG  
AACCCGAAAGACGAAATCTCTTGAACCTCTGGTAAACCGTCCGTG  
AACTGGAATCTGAACTGTCTGCTCGTCTGTAATAAAGACTACAACA  
GATCTACGCTGAAGAAGCTGAAAACCTACCTGGGTAAACTGGAACGT  
GAAATCAGCGTTCCTCTGTTGACCGTGGTTCTCTGGAATCAAATC  
TCCGATCCTGATCCCGCTGGAATACATCGAACGTATGGGTATCGAC  
AACGACACCGAAGCTGTAAACAGATCTTCCGTGTGACAAAAAAT  
TCTGCTGCGTCCGATGTGGCTCCGAACCTGTACAACTACCTGCGT  
AAACTGGACCGTGTCTCTGCCGACCGGATCAAATCTTCGAAATCG  
GTCCGTGCTACCGTAAAGAAATCTGACGGTAAAGAACACTGGAAGA  
ATTCACATGCTGAACTCTGCCAGATGGGTCTGGTTGCACCCGTG  
AAAACCTGGAATCTATCATCACCGACTTCTGAAACACCTGGGTAT  
CGACTCAAAATCGTTGGTACTCTTGCATGGTTACCGTGACACCC  
TGGACGTTATGCACGGTACCTGGAACCTGTCTTCTGCTGTGTGGT  
CCGATCCCGTGGACCGTGAATGGGTATCGACAAACCGTGGATCG  
GTGCTGGTTTCGGTCTGGAACGTCTGCTGAAAGTTAAACACGACTTC  
AAAAACATCAAACGTGCTGCTGTTGAATCTTACTACAACGGTA  
TCTTACCAACCTGTAA

### **Supplementary Table 3**

Table of all fluorescence measurements taken during this work. Provided as *Excel* sheet.

## Supplementary Table 4

Species, abbreviations (abbrev.), original reporting and sequences of all  $\Delta^{NPyl}$ tRNAs used in this work.

| Species                                                      | Abbrev. | Reported                                     | Sequence                                                                         |
|--------------------------------------------------------------|---------|----------------------------------------------|----------------------------------------------------------------------------------|
| <i>Methanosarcina barkeri</i><br>MS                          | Bar     | (2007)<br>Herring et al. <sup>13</sup>       | GGAAACCTGATCATGTAGATCGAATG<br>GACTCTAAATCCGTTTAGCCGGGTTA<br>GATCCCCGGGGTTTCCGCCA |
| <i>Methanococcoides burtonii</i>                             | Bur     | (2007)<br>Herring et al. <sup>13</sup>       | GGAGACTTGATCATGTAGATCGAACG<br>GACTCTAAATCCTTTCAGCCGGGTTA<br>GATCCCCGGAGTTTCCGCCA |
| <i>Methanohalobium</i><br><i>evestigatum</i>                 | Eve     | (2011) Gaston<br>et al. <sup>14</sup>        | GGAAACCCGATCAGGTAGATCGAAT<br>GGACTCTAAATCCATTAGCCGGGTT<br>AGATCCCCGGGGTTTCCGCCA  |
| <i>Methanomethylovorans</i><br><i>hollandica</i>             | Hol     | (2014) Borrel<br>et al. <sup>11</sup>        | GGAAACCGGATCATGTTGATCAAATG<br>GACTCTAAATCCGTTAGCCGGGTTA<br>AATCCCCGGGGTTTCCGCCA  |
| <i>Methanohalophilus mahii</i>                               | Mah     | (2011) Gaston<br>et al. <sup>14</sup>        | GGAAACCTGATCAGGTAGATCAAATG<br>GACTCTAGATCCATTAGCCGGGTTA<br>GATCCCCGGGGTTTCCGCCA  |
| <i>Methanosarcina mazei</i>                                  | Mm      | (2002)<br>Srinivasan et<br>al. <sup>15</sup> | GGAAACCTGATCATGTAGATCGAATG<br>GACTCTAAATCCGTTAGCCGGGTTA<br>GATCCCCGGGGTTTCCGCCA  |
| <i>Methanococcoides</i><br><i>methylutens</i>                | Met     | This work                                    | GGAGACTTGATCATGTAGATCGAACG<br>GACTCTAAATCCGTTAGCCGGGTTA<br>GATCCCCGGAGTTTCCGCCA  |
| <i>Methanolobus profundi</i>                                 | Pro     | This work                                    | GGAAATCAGATCATGTTGATCGAATG<br>GACTCTAAATCCGTTAGTCGGGTTA<br>AATCCCCGAGGTTTCCGCCA  |
| <i>Methanolobus</i><br><i>psychrotolerans</i> sp. YSF-<br>03 | Psy     | This work                                    | GGAAATCGGATCAGGTTGATCGAATG<br>GACTCTAAATCCGTTAGTCGGGTTA<br>AATCCCCGGGGTTTCCGCCA  |
| <i>Methanosarcina spelaei</i>                                | Spe     | This work                                    | GGAAATCTGATCATGTAGATCGAATG<br>GACTCTAAATCCGTTAGCCGGGTTA<br>GATCCCCGGGGTTTCCGCCA  |
| <i>Methanolobus vulcani</i>                                  | Vul     | This work                                    | GGAAATCAGATCATGTTGATCAAATG<br>GACTCTAAATCCGTTTAGCCGGGTTA<br>AATCCCCGGGGTTTCCGCCA |
| <i>Methanosalsum zhilinae</i>                                | Zhi     | This work                                    | GGAAACCTGATCATGTAGATCAAATG<br>GACTCTAAATCCGTTAGCCGGGTTA<br>GATCCCCGGGGTTTCCGCCA  |



## Supplementary Table 5

Sequences of all *Alv*<sup>ΔNPyl</sup>tRNA variants used in this work. Mutated nucleotides are marked in lower case and bold.

| Variant                              | Sequence                                                                                                 |
|--------------------------------------|----------------------------------------------------------------------------------------------------------|
| <i>Alv</i> <sup>ΔNPyl</sup> tRNA(6)  | GGGGACGGTCCGGCGACCAGCGGGTCTCTAAAACCTAGC <b>catag</b><br>CGGGGTTTCGAC <b>a</b> CCCCGGTCTCTCGCCA           |
| <i>Alv</i> <sup>ΔNPyl</sup> tRNA(8)  | GGGGACGGTCCGGCGACCAGCGGGTCTCTAAAACCTAGC <b>cttg</b><br>CGGGGTTTCGAC <b>a</b> CCCCGGTCTCTCGCCA            |
| <i>Alv</i> <sup>ΔNPyl</sup> tRNA(10) | GGGGACGGTCCGGCGACCAGCGGGTCTCTAAAACCTAGC <b>cttag</b><br>CGGGGTTTCGAC <b>a</b> CCCCGGTCTCTCGCCA           |
| <i>Alv</i> <sup>ΔNPyl</sup> tRNA(11) | GGGGACGGTCCGGCGACCAGCGGGTCTCTAAAACCTAGC <b>caa</b><br><b>g</b> CGGGGTTTCGAC <b>c</b> CCCCGGTCTCTCGCCA    |
| <i>Alv</i> <sup>ΔNPyl</sup> tRNA(15) | GGGGACGGTCCGGCGACCAGCGGGTCTCTAAAACCTAGC <b>catca</b><br><b>g</b> CGGGGTTTCGAC <b>a</b> CCCCGGTCTCTCGCCA  |
| <i>Alv</i> <sup>ΔNPyl</sup> tRNA(17) | GGGGACGGTCCGGCGACCAGCGGGTCTCTAAAACCTAGC <b>gtaa</b><br><b>g</b> CGGGGTTTCGAC <b>a</b> CCCCGGTCTCTCGCCA   |
| <i>Alv</i> <sup>ΔNPyl</sup> tRNA(19) | GGGGACGGTCCGGCGACCAGCGGGTCTCTAAAACCTAGC <b>agg</b><br><b>ag</b> CGGGGTTTCGAC <b>t</b> CCCCGGTCTCTCGCCA   |
| <i>Alv</i> <sup>ΔNPyl</sup> tRNA(20) | GGGGACGGTCCGGCGACCAGCGGGTCTCTAAAACCTAGC <b>caca</b><br><b>ag</b> CGGGGTTTCGAC <b>a</b> CCCCGGTCTCTCGCCA  |
| <i>Alv</i> <sup>ΔNPyl</sup> tRNA(21) | GGGGACGGTCCGGCGACCAGCGGGTCTCTAAAACCTAGC <b>cataa</b><br><b>g</b> CGGGGTTTCGAC <b>c</b> CCCCGGTCTCTCGCCA  |
| <i>Alv</i> <sup>ΔNPyl</sup> tRNA(22) | GGGGACGGTCCGGCGACCAGCGGGTCTCTAAAACCTAGC <b>ctcaa</b><br><b>gg</b> CGGGGTTTCGAC <b>t</b> CCCCGGTCTCTCGCCA |
| <i>Alv</i> <sup>ΔNPyl</sup> tRNA(23) | GGGGACGGTCCGGCGACCAGCGGGTCTCTAAAACCTAGC <b>cttt</b><br><b>ag</b> CGGGGTTTCGAC <b>g</b> CCCCGGTCTCTCGCCA  |
| <i>Alv</i> <sup>ΔNPyl</sup> tRNA(24) | GGGGACGGTCCGGCGACCAGCGGGTCTCTAAAACCTAGC <b>catcg</b><br><b>tg</b> CGGGGTTTCGAC <b>t</b> CCCCGGTCTCTCGCCA |

## Supplementary Table 6

Sequences of *Int*<sup>ΔN<sup>Pyl</sup></sup>tRNA variable loop variants used in this work. Mutated nucleotides are marked in lower case and bold.

| Variant                                                        | Sequence                                                                                               |
|----------------------------------------------------------------|--------------------------------------------------------------------------------------------------------|
| <i>Int</i> <sup>ΔN<sup>Pyl</sup></sup> tRNA <sup>(VB01)</sup>  | GGAGTGTGGTCCGGGACCACCAGGCCTCTAAAGCCACGG <b>Ctt</b><br>GCCGGGTTCAACTCCCGGGCACTTCGCCA                    |
| <i>Int</i> <sup>ΔN<sup>Pyl</sup></sup> tRNA <sup>(VB03)</sup>  | GGAGTGTGGTCCGGGACCACCAGGCCTCTAAAGCCACGG <b>Ct</b><br>AGCCGGGTTCAACTCCCGGGCACTTCGCCA                    |
| <i>Int</i> <sup>ΔN<sup>Pyl</sup></sup> tRNA <sup>(VC08)</sup>  | GGAGTGTGGTCCGGGACCACCAGGCCTCTAAAGCCACGG <b>gat</b><br>GCCGGGTTCAACTCCCGGGCACTTCGCCA                    |
| <i>Int</i> <sup>ΔN<sup>Pyl</sup></sup> tRNA <sup>(VC10)</sup>  | GGAGTGTGGTCCGGGACCACCAGGCCTCTAAAGCCACGG <b>ttA</b><br>GCCGGGTTCAACTCCCGGGCACTTCGCCA                    |
| <i>Int</i> <sup>ΔN<sup>Pyl</sup></sup> tRNA <sup>(VD01)</sup>  | GGAGTGTGGTCCGGGACCACCAGGCCTCTAAAGCCACGG <b>gaC</b><br>AGCCGGGTTCAACTCCCGGGCACTTCGCCA                   |
| <i>Int</i> <sup>ΔN<sup>Pyl</sup></sup> tRNA <sup>(VG04)</sup>  | GGAGTGTGGT <b>tCGGt</b> GACCACCAGGCCTCTAAAGCCACGG <b>CAa</b><br>GCCGGGTT <b>Cg</b> ACTCCCGGGCACTTCGCCA |
| <i>Int</i> <sup>ΔN<sup>Pyl</sup></sup> tRNA <sup>(VIF01)</sup> | GGAGTGTGGTCCGGGACCACCAGGCCTCTAAAGCCACGG <b>CAc</b><br><b>a</b> GCCGGGTTCAACTCCCGGGCACTTCGCCA           |

## Supplementary Table 7

Sequences of *Int*<sup>ΔN<sup>Pyl</sup></sup>tRNA acceptor stem variants used in this work. Mutated nucleotides are marked in lower case and bold.

| Variant                                                       | Sequence                                                                                                       |
|---------------------------------------------------------------|----------------------------------------------------------------------------------------------------------------|
| <i>Int</i> <sup>ΔN<sup>Pyl</sup></sup> tRNA( <sup>A</sup> 5)  | GGt <b>Gaca</b> TGGTCCGGGACCACCAGGCCTCTAAAGCCACGGCAGC<br>CGGGTTCAACTCCCGG <b>gtCa</b> TCGCCA                   |
| <i>Int</i> <sup>ΔN<sup>Pyl</sup></sup> tRNA( <sup>A</sup> 6)  | GGt <b>Gaac</b> TGGTCCGGGACCACCAGGCCTCTAAAGCCACGGCAGC<br>CGGGTTCAACTCCCGG <b>gtCa</b> TCGCCA                   |
| <i>Int</i> <sup>ΔN<sup>Pyl</sup></sup> tRNA( <sup>A</sup> 7)  | GG <b>Aaac</b> TGGTCCGGGACCACCAGGCCTCTAAAGCCACGGCAGC<br>CGGGTTCAACTCCCGG <b>gtt</b> TCGCCA                     |
| <i>Int</i> <sup>ΔN<sup>Pyl</sup></sup> tRNA( <sup>A</sup> 9)  | GG <b>AccGa</b> TGGTCCGGGACCACCAGGCCTCTAAAG <b>t</b> CACGGCAGC<br>CGGGTTCAACTCCCGG <b>tCa</b> TCGCCA           |
| <i>Int</i> <sup>ΔN<sup>Pyl</sup></sup> tRNA( <sup>A</sup> 10) | GGAGT <b>ta</b> TGGTCCGGGACCACCAGGCCTCTAAAG <b>t</b> CACGGCAGC<br>CGGGTTCAACTCCCGG <b>ta</b> ACTTCGCCA         |
| <i>Int</i> <sup>ΔN<sup>Pyl</sup></sup> tRNA( <sup>A</sup> 11) | GG <b>gcTaa</b> TGGTCCGGGACCACCAGGCCTCTAAAGCCACGGCAGC<br>CGGGTTCAACTCCCGG <b>ttA</b> gcTCGCCA                  |
| <i>Int</i> <sup>ΔN<sup>Pyl</sup></sup> tRNA( <sup>A</sup> 12) | GGAGT <b>tc</b> TGGTCCGGGACCACCAGGCCTCTAAAGCCACGGCAGC<br>CGGGTTCAACTCCCGG <b>Ga</b> ACTTCGCCA                  |
| <i>Int</i> <sup>ΔN<sup>Pyl</sup></sup> tRNA( <sup>A</sup> 13) | GGtGT <b>tc</b> TGGTCCGGGACCACC <b>g</b> GGCCTCTAAAGCCACGGCAGCC<br>GGTTC <b>Ca</b> ACTCCCGG <b>GaCa</b> TCGCCA |
| <i>Int</i> <sup>ΔN<sup>Pyl</sup></sup> tRNA( <sup>A</sup> 14) | GGAGT <b>aa</b> TGGTCCGGGACCACCAGGCCTCTAAAGCCACGGCAG<br>CCGGTTC <b>Ca</b> ACTCCCGG <b>tt</b> ACTTCGCCA         |
| <i>Int</i> <sup>ΔN<sup>Pyl</sup></sup> tRNA( <sup>A</sup> 16) | GG <b>tcTca</b> TGGTCCGGGACCACCAGGCCTCTAAAGCCACGGCAGC<br>CGGGTTCAACTCCCGG <b>tgA</b> gaTCGCCA                  |
| <i>Int</i> <sup>ΔN<sup>Pyl</sup></sup> tRNA( <sup>A</sup> 17) | GG <b>cGaac</b> TGGTCCGGGACCACCAGGCCTCTAAAGCCACGGCAGC<br>CGGGTTCAACTCCCGG <b>ttC</b> gTCGCCA                   |

## Supplementary Table 8

Sequences of *Int*<sup>ΔN<sup>Pyl</sup></sup>tRNA hybrids used in this work. Mutated nucleotides are marked in lower case and bold.

| Variant                                                 | Sequence                                                                                                         |
|---------------------------------------------------------|------------------------------------------------------------------------------------------------------------------|
| <i>Int</i> <sup>ΔN<sup>Pyl</sup></sup> tRNA(A5, V B03)  | GGt <b>Gaca</b> TGGTCCGGGACCACCAGGCCTCTAAAGCCACGGCtAGC<br>CGGGTTCAACTCCCCG <b>gtg</b> CaTCGCCA                   |
| <i>Int</i> <sup>ΔN<sup>Pyl</sup></sup> tRNA(A6, V B03)  | GGt <b>Gaac</b> TGGTCCGGGACCACCAGGCCTCTAAAGCCACGGCtAGC<br>CGGGTTCAACTCCCCGG <b>gtt</b> CaTCGCCA                  |
| <i>Int</i> <sup>ΔN<sup>Pyl</sup></sup> tRNA(A7, V B03)  | GG <b>Aaac</b> TGGTCCGGGACCACCAGGCCTCTAAAGCCACGGCtAGC<br>CGGGTTCAACTCCCCGG <b>gtt</b> TCGCCA                     |
| <i>Int</i> <sup>ΔN<sup>Pyl</sup></sup> tRNA(A9, V B03)  | GG <b>AccGa</b> TGGTCCGGGACCACCAGGCCTCTAAAG <b>t</b> CACGGCtAGC<br>CGGGTTCAACTCCCCG <b>gt</b> CacTCGCCA          |
| <i>Int</i> <sup>ΔN<sup>Pyl</sup></sup> tRNA(A10, V B03) | GGAGT <b>ta</b> TGGTCCGGGACCACCAGGCCTCTAAAG <b>t</b> CACGGCtAGC<br>CGGGTTCAACTCCCCG <b>ta</b> ACTTCGCCA          |
| <i>Int</i> <sup>ΔN<sup>Pyl</sup></sup> tRNA(A11, V B03) | GG <b>gcTaa</b> TGGTCCGGGACCACCAGGCCTCTAAAGCCACGGCtAGC<br>CGGGTTCAACTCCCCG <b>gttAgc</b> TCGCCA                  |
| <i>Int</i> <sup>ΔN<sup>Pyl</sup></sup> tRNA(A12, V B03) | GGAGT <b>tc</b> TGGTCCGGGACCACCAGGCCTCTAAAGCCACGGC <b>t</b> AG<br>CCGGTTCAACTCCCCGG <b>Ga</b> ACTTCGCCA          |
| <i>Int</i> <sup>ΔN<sup>Pyl</sup></sup> tRNA(A13, V B03) | GGTGT <b>tc</b> TGGTCCGGGACCACC <b>g</b> GGCCTCTAAAGCCACGGCtAGC<br>CGGGTTCAACTCCCCGG <b>Ga</b> CaTCGCCA          |
| <i>Int</i> <sup>ΔN<sup>Pyl</sup></sup> tRNA(A14, V B03) | GGAGT <b>aa</b> TGGTCCGGGACCACCAGGCCTCTAAAGCCACGGC <b>t</b> AG<br>CCGGTTCAACTCCCCG <b>gtt</b> ACTTCGCCA          |
| <i>Int</i> <sup>ΔN<sup>Pyl</sup></sup> tRNA(A16, V B03) | GG <b>tcTca</b> TGGTCCGGGACCACCAGGCCTCTAAAGCCACGGCtAGC<br>CGGGTTCAACTCCCCG <b>gtgAga</b> TCGCCA                  |
| <i>Int</i> <sup>ΔN<sup>Pyl</sup></sup> tRNA(A17, V B03) | GG <b>cGaac</b> TGGTCCGGGACCACCAGGCCTCTAAAGCCACGGCtAGC<br>CGGGTTCAACTCCCCGG <b>gttCg</b> TCGCCA                  |
| <i>Int</i> <sup>ΔN<sup>Pyl</sup></sup> tRNA(A5, V C10)  | GGt <b>Gaca</b> TGGTCCGGGACCACCAGGCCTCTAAAGCCACGG <b>tt</b> AGC<br>CGGGTTCAACTCCCCG <b>gtg</b> CaTCGCCA          |
| <i>Int</i> <sup>ΔN<sup>Pyl</sup></sup> tRNA(A6, V C10)  | GGt <b>Gaac</b> TGGTCCGGGACCACCAGGCCTCTAAAGCCACGG <b>tt</b> AGC<br>CGGGTTCAACTCCCCGG <b>gtt</b> CaTCGCCA         |
| <i>Int</i> <sup>ΔN<sup>Pyl</sup></sup> tRNA(A7, V C10)  | GG <b>Aaac</b> TGGTCCGGGACCACCAGGCCTCTAAAGCCACGG <b>tt</b> AGC<br>CGGGTTCAACTCCCCGG <b>gtt</b> TCGCCA            |
| <i>Int</i> <sup>ΔN<sup>Pyl</sup></sup> tRNA(A9, V C10)  | GG <b>AccGa</b> TGGTCCGGGACCACCAGGCCTCTAAAG <b>t</b> CACGG <b>tt</b> AGC<br>CGGGTTCAACTCCCCG <b>gt</b> CacTCGCCA |
| <i>Int</i> <sup>ΔN<sup>Pyl</sup></sup> tRNA(A10, V C10) | GGAGT <b>ta</b> TGGTCCGGGACCACCAGGCCTCTAAAG <b>t</b> CACGG <b>tt</b> AGC<br>CGGGTTCAACTCCCCG <b>ta</b> ACTTCGCCA |
| <i>Int</i> <sup>ΔN<sup>Pyl</sup></sup> tRNA(A11, V C10) | GG <b>gcTaa</b> TGGTCCGGGACCACCAGGCCTCTAAAGCCACGG <b>tt</b> AGC<br>CGGGTTCAACTCCCCG <b>gttAgc</b> TCGCCA         |
| <i>Int</i> <sup>ΔN<sup>Pyl</sup></sup> tRNA(A12, V C10) | GGAGT <b>tc</b> TGGTCCGGGACCACCAGGCCTCTAAAGCCACGG <b>tt</b> AGC<br>CGGGTTCAACTCCCCGG <b>Ga</b> ACTTCGCCA         |
| <i>Int</i> <sup>ΔN<sup>Pyl</sup></sup> tRNA(A13, V C10) | GGTGT <b>tc</b> TGGTCCGGGACCACC <b>g</b> GGCCTCTAAAGCCACGG <b>tt</b> AGCC<br>GGTTCAACTCCCCGG <b>Ga</b> CaTCGCCA  |
| <i>Int</i> <sup>ΔN<sup>Pyl</sup></sup> tRNA(A14, V C10) | GGAGT <b>aa</b> TGGTCCGGGACCACCAGGCCTCTAAAGCCACGG <b>tt</b> AG<br>CCGGTTCAACTCCCCG <b>gtt</b> ACTTCGCCA          |
| <i>Int</i> <sup>ΔN<sup>Pyl</sup></sup> tRNA(A16, V C10) | GG <b>tcTca</b> TGGTCCGGGACCACCAGGCCTCTAAAGCCACGG <b>tt</b> AGC<br>CGGGTTCAACTCCCCG <b>gtgAga</b> TCGCCA         |
| <i>Int</i> <sup>ΔN<sup>Pyl</sup></sup> tRNA(A17, V C10) | GG <b>cGaac</b> TGGTCCGGGACCACCAGGCCTCTAAAGCCACGG <b>tt</b> AGC<br>CGGGTTCAACTCCCCGG <b>gttCg</b> TCGCCA         |

## Supplementary Table 9

Sequence identity matrix of <sup>f<sup>ΔNPyI</sup></sup>tRNA combinations.

|              | <i>RumEn</i> | <i>Lum1</i> | <i>Int</i> | <i>Lum2</i> | <i>Sheng</i> | <i>030</i> | <i>Term</i> | <i>G1</i> | <i>1R26</i> | <i>H5</i> | <i>Alv</i> |
|--------------|--------------|-------------|------------|-------------|--------------|------------|-------------|-----------|-------------|-----------|------------|
| <i>RumEn</i> | 100          | 95.83       | 95.77      | 91.55       | 88.73        | 88.73      | 68.57       | 70        | 67.61       | 70.42     | 71.83      |
| <i>Lum1</i>  | 95.83        | 100         | 95.77      | 91.55       | 88.73        | 88.73      | 67.14       | 70        | 67.61       | 70.42     | 71.83      |
| <i>Int</i>   | 95.77        | 95.77       | 100        | 92.96       | 90.14        | 92.96      | 68.57       | 68.12     | 65.71       | 68.57     | 70         |
| <i>Lum2</i>  | 91.55        | 91.55       | 92.96      | 100         | 94.37        | 91.55      | 70          | 69.57     | 67.14       | 70        | 71.43      |
| <i>Sheng</i> | 88.73        | 88.73       | 90.14      | 94.37       | 100          | 88.73      | 68.57       | 71.01     | 67.14       | 70        | 71.43      |
| <i>30</i>    | 88.73        | 88.73       | 92.96      | 91.55       | 88.73        | 100        | 71.43       | 69.57     | 68.57       | 71.43     | 72.86      |
| <i>Term</i>  | 68.57        | 67.14       | 68.57      | 70          | 68.57        | 71.43      | 100         | 71.01     | 78.57       | 77.14     | 82.86      |
| <i>G1</i>    | 70           | 70          | 68.12      | 69.57       | 71.01        | 69.57      | 71.01       | 100       | 84.29       | 88.57     | 85.71      |
| <i>1R26</i>  | 67.61        | 67.61       | 65.71      | 67.14       | 67.14        | 68.57      | 78.57       | 84.29     | 100         | 94.37     | 94.37      |
| <i>H5</i>    | 70.42        | 70.42       | 68.57      | 70          | 70           | 71.43      | 77.14       | 88.57     | 94.37       | 100       | 94.37      |
| <i>Alv</i>   | 71.83        | 71.83       | 70         | 71.43       | 71.43        | 72.86      | 82.86       | 85.71     | 94.37       | 94.37     | 100        |

## Supplementary Table 10

Sequence identity matrix of  $\Delta$ NPylRS combinations.

|              | <i>Alv</i> | <i>IR26</i> | <i>BRNA</i> | <i>Term</i> | <i>G1</i> | <i>H5</i> | <i>RumEn</i> | <i>Int</i> | <i>S30</i> | <i>Lum2</i> | <i>Lum1</i> | <i>Sheng</i> |
|--------------|------------|-------------|-------------|-------------|-----------|-----------|--------------|------------|------------|-------------|-------------|--------------|
| <i>Alv</i>   | 100        | 82.18       | 78.75       | 65.33       | 64.47     | 65.33     | 51.09        | 49.64      | 49.64      | 47.81       | 50          | 47.25        |
| <i>IR26</i>  | 82.18      | 100         | 75.46       | 63.87       | 64.1      | 63.5      | 52.55        | 49.64      | 49.27      | 46.72       | 48.54       | 46.52        |
| <i>BRNA</i>  | 78.75      | 75.46       | 100         | 62.5        | 60.52     | 60.66     | 47.79        | 44.12      | 46.69      | 45.96       | 47.79       | 44.85        |
| <i>Term</i>  | 65.33      | 63.87       | 62.5        | 100         | 63.74     | 62.77     | 56.2         | 52.92      | 52.19      | 50.73       | 50.36       | 52.38        |
| <i>G1</i>    | 64.47      | 64.1        | 60.52       | 63.74       | 100       | 60.81     | 50.92        | 54.21      | 50.18      | 45.42       | 46.15       | 49.26        |
| <i>H5</i>    | 65.33      | 63.5        | 60.66       | 62.77       | 60.81     | 100       | 50.73        | 49.27      | 51.46      | 50          | 51.46       | 49.08        |
| <i>RumEn</i> | 51.09      | 52.55       | 47.79       | 56.2        | 50.92     | 50.73     | 100          | 68.36      | 65.09      | 59.27       | 54.55       | 56.2         |
| <i>Int</i>   | 49.64      | 49.64       | 44.12       | 52.92       | 54.21     | 49.27     | 68.36        | 100        | 62.91      | 57.09       | 54.91       | 55.84        |
| <i>S30</i>   | 49.64      | 49.27       | 46.69       | 52.19       | 50.18     | 51.46     | 65.09        | 62.91      | 100        | 66.55       | 56.36       | 57.3         |
| <i>Lum2</i>  | 47.81      | 46.72       | 45.96       | 50.73       | 45.42     | 50        | 59.27        | 57.09      | 66.55      | 100         | 56.36       | 56.57        |
| <i>Lum1</i>  | 50         | 48.54       | 47.79       | 50.36       | 46.15     | 51.46     | 54.55        | 54.91      | 56.36      | 56.36       | 100         | 58.03        |
| <i>Sheng</i> | 47.25      | 46.52       | 44.85       | 52.38       | 49.26     | 49.08     | 56.2         | 55.84      | 57.3       | 56.57       | 58.03       | 100          |

## Supplementary Table 11

Primers used for library generation.

| Primer name       | Library           | Sequence                                                                                                                                            |
|-------------------|-------------------|-----------------------------------------------------------------------------------------------------------------------------------------------------|
| int-aaBsbIF       | Variable Loop 4-6 | CGGgaagacCGCCAactagtATCCTTAGCGAAAGCTAAG<br>GATTTTTTTTaaagcttGGCACTGGCCGTCGTTTTAC                                                                    |
| int-aaL3-4-2BbsIR | Variable Loop 4   | AAGgaagacAGTTGGCGAAGTGCCCGGnnTTGAACC<br>CGGnnnnCCGTGGCTTTAGAGGCCTGGTGGTCnnnG<br>ACCAACACTCCagatctagcgttacaagtatTACACAAA                             |
| int-aaL3-5-2BbsIR | Variable Loop 5   | AAGgaagacAGTTGGCGAAGTGCCCGGnnTTGAACC<br>CGGnnnnnCCGTGGCTTTAGAGGCCTGGTGGTCnnnG<br>ACCAACACTCCagatctagcgttacaagtatTACACAAA                            |
| int-aaL3-6-2BbsIR | Variable Loop 6   | AAGgaagacAGTTGGCGAAGTGCCCGGnnTTGAACC<br>CGGnnnnnCCGTGGCTTTAGAGGCCTGGTGGTCnnn<br>GACCAACACTCCagatctagcgttacaagtatTACACAAA                            |
| oDD299            | Acceptor Stem     | AAGGAAGACCCTTAGCTTTCGCTAAGGATACTAGT<br>TGGCGAnnnnnCCGGGAGTTGAACCCGGCTGCCGTG<br>GCTTTAGAGGCCTGGTGGTCCCGGACCAnnnnnCCA<br>GATCTAGCGTTACAAGTATTACACAAAG |
| oDD301            | Acceptor Stem     | CCGgaagacAGCTAAGGATTTTTTTTaaagcttGGCACTGG<br>CCGTCGTTTTACAACGTCGTGACTGGGAAAACCT<br>GGCGTTACCCAAC                                                    |

## Plasmids

### pKW1 *Alv*PyIRS *Alv*<sup>ΔN</sup>Py<sup>t</sup>tRNA

| Sequence feature                              | Nucleotide position |
|-----------------------------------------------|---------------------|
| <i>lpp</i> promoter                           | 534 - 558           |
| <i>Alv</i> <sup>ΔN</sup> Py <sup>t</sup> tRNA | 579 - 649           |
| rrnC terminator                               | 656 - 684           |
| SpR antibiotic resistance                     | 1369 - 2160         |
| pMB1 replication origin                       | 2316 - 2904         |

tgcagttcaaacgctaaattgcctgatgcgctacgcttatcaggcctacatgatctctgcaatatattgagttgctgctttttagg  
ccggataaggcgttcacgccatccggcaagaacagcaacaatccaaaacgccggttcggcggtcgacacagatgtag  
gtgtccacagggtagccagcagcatcctgcgatgcagatccggaacataatggtgcagggcgcttcttggcgtgggtatgg  
tggcaggccccgtggccgggggactgttgggcgctgccggcacctgtctacgagttgcatgataaagaatacagtcataagt  
gcgggcagcatagtcatgccccgcgccaccggaaggagctaccggcagcgggtcggactgttgaactcagaataagaaat  
gaggccgctcatggcgttctgttcccgtctcactggtgaaaagaaaaacaacctggcgccgcttcttgagcgaacgatcaaa  
aataagtggcgccccatcaaaaaataTTCTCAACATAAAAACTTTGTGTAatacttgtaacgctagatc  
tGGGGGACGGTCCGGCGACCAGCGGGTCTCTAAAACCTAGCCAGCGGGGTTC  
GACGCCCGGTCTCTCGCCAactagtATCCTTAGCGAAAGCTAAGGATTTTTTTTta  
agcttggcactggcgtggtttacaacgtgctgactgggaaaacctggcgttacccaacttaategecttcagcacatcccc  
tttcgacagacgctctcccttatgcgactcctgcattaggaagcagcccagtagtaggttagggcgttgagcaccgccgccg  
aaggaaatggtgcatgcaaggagcccagatgcgccgctgctggctgctggagatggcggacgcgatggatgttctggcg  
gccgcataatgcttaagtcgaacagaaagtaatcgtattgtacacggccgcataatcgaattaaattggatcgcggcaggccac  
gcgatcgtgacgtcggtaccctcgagtctggtaaagaaacctgctgctgcgaaattgaacgccagcacatggactcgtctacta  
gcgagcttaattaacctaggctgctgccaccgctgagcaataactagcataaccttggggcctctaaacgggtcttgaggg  
gtttttgctgaaacctcaggcattgagaagcacacggtcacactgctccggtagcaataaacggtaaacagcaatagaca  
taagcggctatthaacacctgacctgaaccgacgaccgggtcactgctggccgatcttgcggccccctggcttgaacgaatt  
gtagacaTTATTTGCCGACTACCTTGGTGATCTCGCCTTTCACGTAGTGGACAAA  
TTCTTCCAACCTGATCTGCGCGGAGGCCAAGCGATCTTCTTCTTGTCCAAGAT  
AAGCCTGTCTAGCTTCAAGTATGACGGGCTGATACTGGGCCGGCAGGCGCTC  
CATTGCCCAGTCGGCAGCGACATCCTTCGGCGCGATTTTGCCGGTACTGCGC  
TGTACCAAATGCGGGACAACGTAAGCACTACATTTGCTCATCGCCAGCCCA  
GTCGGGCGGCGAGTTCCATAGCGTTAAGGTTTCATTTAGCGCCTCAAATAGAT  
CCTGTTCAGGAACCGGATCAAAGAGTTCCTCCGCCGCTGGACCTACCAAGGC  
AACGCTATGTTCTCTTGTCTTTTGTGTCAGCAAGATAGCCAGATCAATGTCGATCG  
TGGCTGGCTCGAAGATACCTGCAAGAATGTCATTGCGCTGCCATTCTCCAAT  
TGCAGTTCGCGCTTAGCTGGATAACGCCACGGAATGATGTCGTCGTGCACAA  
CAATGGTGACTTCTACAGCGCGGAGAATCTCGCTCTCTCCAGGGGAAGCCGA  
AGTTTCCAAAAGGTCGTTGATCAAAGCTCGCCGCGTTGTTTCATCAAGCCTTA  
CGGTCACCGTAACCAGCAAATCAATATCACTGTGTGGCTTCAGGCCGCCATC  
CACTGCGGAGCCGTACAAATGTACGGCCAGCAACGTCGGTTCGAGATGGCGC  
TCGATGACGCCAACTACCTCTGATAGTTGAGTCGATACTTCGGCGATCACCGC  
TTCCCTCAactcttcttttcaatattattgaagcattatcagggttattgtctcatgagcggatacatatttgaatgatttag

aaaaataaacaatagctagcgagcaaaaggccagcaaaaggccaggaaccgtaaaaaggccggttgctggcgttTTC  
CATAGGCTCCGCCCCCTGACGAGCATCACAAAATCGACGCTCAAGTCAGA  
GGTGGCGAAACCCGACAGGACTATAAAGATACCAGGCGTTTCCCCTGGAAG  
CTCCCTCGTGCCTCTCCTGTTCCGACCCTGCCGCTTACCGGATACCTGTCCG  
CCTTTCTCCCTTCGGGAAGCGTGGCGCTTTCATAGCTCACGCTGTAGGTAT  
CTCAGTTCGGTGTAGGTTCGTTTCGCTCCAAGCTGGGCTGTGTGCACGAACCCCC  
CGTTCAGCCCGACCCTGCGCCTTATCCGGTAACTATCGTCTTGAGTCCAACC  
CGGTAAGACACGACTTATCGCCACTGGCAGCAGCCACTGGTAACAGGATTAG  
CAGAGCGAGGTATGTAGGCGGTGCTACAGAGTTCCTTGAAGTGGTGGCCTAAC  
TACGGCTACACTAGAAGGACAGTATTTGGTATCTGCGCTCTGCTGAAGCCAG  
TTACCTTCGGAAAAAGAGTTGGTAGCTCTTGATCCGGCAAACAAACCACCGC  
TGGTAGCGGTGGTTTTTTTTGTTTGAAGCAGCAGATTACGCGCAGAAAAAAA  
GGATCTCAAgaagatccttgatctttctacggggtctgacgctcagt

**pKW1 *Alv*PylRS *Alv*<sup>ANPyl</sup>tRNA**

| Sequence feature                 | Nucleotide position |
|----------------------------------|---------------------|
| <i>glnS</i> promoter             | 14 - 39             |
| <i>Alv</i> PylRS                 | 81 - 908            |
| <i>lpp</i> promoter              | 1443 - 1467         |
| <i>Alv</i> <sup>ANPyl</sup> tRNA | 1488 - 1558         |
| <i>rrnC</i> terminator           | 1565 - 1593         |
| SpR antibiotic resistance        | 2278 - 3069         |
| pMB1 replication origin          | 3225 - 3813         |

ggatcctcgggagTTGTCAGCCTGTCCCGCTTATAAGATcatacgcggttatacgttggttacgcttgag  
gaatcccatATGACGGTGAAATACACAGACGCGCAGATTCAGCGTTTACGCGAGT  
ATGGAAATGGGACTTACGAACAGAAGGTCTTTGAGGATCTGGCGAGTCGTGA  
TGCAGCGTTTTCAAAGAGATGTCCGTTGCGTCTACGGATAATGAGAAGAAA  
ATCAAGGGTATGATCGCCAACCCTAGTCGTCATGGGCTGACCCAATTAATGA  
ATGACATTGCGGATGCCCTGGTTCGAGAGGGTTTTATCGAAGTGCGCACTCC  
AATCTTTATTTCTAAGGATGCTTTGGCACGCATGACCATCACCGAGGACAAAC  
CATTATTTAAACAGGTTTTTTGGATCGACGAAAAACGTGCCTTACGCCCAATG  
CTGGCTCCAAACCTGTATAGTGTCATGCGTGATCTTCGCGATCACACAGATGG  
CCCTGTTAAGATTTTTGAGATGGGATCTTGTTTTTCGTAAGGAGTCACATTCTG  
GCATGCATCTGGAAGAGTTTACGATGCTTAATCTGGTTCGATATGGGGCCTCGC  
GGCGACGCGACTGAAGTATTGAAGAATTACATTAGCGTAGTTATGAAGGCAG  
CCGGGCTTCTGACTATGACTTGGTCCAAGAAGAGTCGGATGTATATAAGGA  
AACTATCGATGTTGAGATCAACGGACAAGAAGTTTGCAGCGCGGCGGTAGGT  
CCCATTACCTGGATGCCGCTCACGATGTTTCACGAGCCTTGGAGCGGCGCGG  
GTTTCGGCCTTGAACGCCTTTTAACTATCCGCGAGAAATATTCCACCGTGAAA  
AAGGGCGGCGCGTCAATCTCCTATCTGAATGGGGCCAAAATTAATTAActgcagt  
tcaaacgctaaattgcctgatgcgctacgcttatcaggcctacatgatctctgcaatatattgagttgctgcttttaggcccga  
taaggcgttcacgccgatccggcaagaacagcaacaatccaaacgccgcgttcggcggtcgacacagatgtaggtgtc



cacaggtagccagcagcatcctgcatgcagatccggaacataatggtgcagggcgcttgttcggcgtgggtatggtggca  
ggccccgtggccgggggactgttgggctgcccggcacctgtcctacgagttgcatgataaagaagacagtcataagtgcgg  
cgacgatagtcagccccgcgccaccggaaggagctaccggcagcgggtgcggactgttgaactcagaataagaatgagg  
ccgctcatggcgttctgttgccegtctcactggtgaaaagaaaaaacctggcggcgttctttgagcgaacgatcaaaaata  
agtggcgeccatcaaaaaataTTCTCAACATAAAAACTTTGTGTAaacttgaacgtagatctG  
GGGGACGGTCCGGCGACCAGCGGGTCTCTAAAACCTAGCCAGCGGGGTTCGA  
CGCCCCGGTCTCTCGCCAactagtATCCTTAGCGAAAGCTAAGGATTTTTTTTTaagct  
tggcactggcctgcttttacaacgtcgtgactgggaaaaccctggcgttaccacaactaatgccttgcagcacatcccccttc  
gccagacgctctcccttatgcgactcctgcattaggaagcagcccagtagtaggtgaggccgttgcagaccgcccggcaag  
gaatggtgcatgaaggagcccagatgcgccgctgcccgtgctggagatggcggacgcgatggatgttctggcggcc  
gcataatgcttaagtgaacagaaagtaaatcgtattgtacagcccgcataatcgaaattaaattggatcggcaggccacgcg  
atcgtgacgtcggtagcctcagctggtgaaagaaaccgctgctgcgaaattgaacgccagcacatggactcgtctactagcg  
cagcttaattaacctaggtgctgccaccgctgagcaataactagcataacccttgggcctctaaacgggtcttgggggtttt  
tctgaaacctcaggcatttgagaagcacacggctcactgcttcggtagtcaataaacggtaaacagcaatagacataag  
cggctatttaacgacctgcctgaaccgacgaccggctcctggtggcggatcttgcggcccctcggttgaacgaattgttag  
acaTTATTTGCCGACTACCTTGGTGATCTCGCCTTTCACGTAGTGGACAAATTC  
TTCCAACTGATCTGCGCGCAGGCCAAGCGATCTTCTTCTTGTCCAAGATAAG  
CCTGTCTAGCTTCAAGTATGACGGGCTGATACTGGGCCGGCAGGCGCTCCATT  
GCCAGTCGGCAGCGACATCCTTCGGCGCGATTTTGCCGGTTACTGCGCTGTA  
CCAAATGCGGGACAACGTAAGCACTACATTTGCTCATCGCCAGCCCAGTCG  
GGCGGCGAGTTCCATAGCGTTAAGGTTTCATTTAGCGCCTCAAATAGATCCTG  
TTCAGGAACCGGATCAAAGAGTTCCTCCGCGCTGGACCTACCAAGGCAACG  
CTATGTTCTCTTGCTTTTGTGCAAGATAGCCAGATCAATGTCGATCGTGGC  
TGGCTCGAAGATACTGCAAGAATGTCATTGCGCTGCCATTCTCCAAATTGCA  
GTTGCGCTTAGCTGGATAACGCCACGGAATGATGTCGTCGTGCACAACAAT  
GGTGACTTCTACAGCGCGGAGAATCTCGCTCTCTCCAGGGGAAGCCGAAGTT  
TCCAAAAGGTCGTTGATCAAAGCTCGCCGCGTTGTTTCATCAAGCCTTACGGT  
CACCGTAACCAGCAAATCAATATCACTGTGTGGCTTCAGGCCGCCATCCACT  
GCGGAGCCGTACAAATGTACGGCCAGCAACGTCGGTTCGAGATGGCGCTCGA  
TGACGCCAACTACCTCTGATAGTTGAGTCGATACTTCGGCGATCACCGCTTCC  
CTCA Tacttctcttttcaatattattgaagcatttatcagggttattgtctcatgagcggatacatatttgaatgtatttagaaaat  
aaacaaatagctagcagcaaaaaggccagcaaaaaggccaggaaccgtaaaaaggccgcttgcggctTTTCCAT  
AGGCTCCGCCCCCTGACGAGCATCACAAAATCGACGCTCAAGTCAGAGGT  
GGCGAAACCCGACAGGACTATAAAGATAACCAGGCGTTTCCCCCTGGAAGCTC  
CCTCGTGCCTCTCCTGTTCCGACCCTGCCGCTTACCGGATACCTGTCCGCT  
TTCTCCCTTCGGGAAGCGTGGCGCTTTCTCATAGCTCACGCTGTAGGTATCTC  
AGTTCGGTGTAGGTCGTTGCTCCAAGCTGGGCTGTGTGCACGAACCCCCCGT  
TCAGCCCGACCGCTGCGCCTTATCCGGTAACTATCGTCTTGAGTCCAACCCGG  
TAAGACACGACTTATCGCCACTGGCAGCAGCCACTGGTAACAGGATTAGCAG  
AGCGAGGTATGTAGGCGGTGCTACAGAGTTCTTGAAGTGGTGGCCTAACTAC  
GGCTACACTAGAAGGACAGTATTTGGTATCTGCGCTCTGCTGAAGCCAGTTA  
CCTTCGGAAAAAGAGTTGGTAGCTCTTGATCCGGCAAACAAACCACCGCTGG  
TAGCGGTGGTTTTTTTTGTTTGAAGCAGCAGATTACGCGCAGAAAAAAGGA  
TCTCAAGaatcccttctacgggtctgacgctcagtggaacgaaaactcacgtaagggtttg

## pBAD GFP(150TAG)<sub>His6</sub>

| Sequence feature                         | Nucleotide position |
|------------------------------------------|---------------------|
| p15A replication origin                  | 349 - 1175          |
| TetR antibiotic resistance               | 1347 - 2537         |
| AraC arabinose transcriptional regulator | 2845 - 3723         |
| sfGFP(150TAG) <sub>His6</sub>            | 4068 - 4811         |

gagagaagattttcagcctgatacagattaaatcagaacgcagaagcggctctgataaaacagaatttgccctggcggcagtagcg  
cggtggcccactgaccccatgccgaactcagaagtgaacgccgtagcggcgatggtagtgggggtcctcccatgcgaga  
gtagggactgccagcatcaataaaacgaaaggctcagtcgaaagactgggccttctgtttatctgttgttgcggtgaacg  
ctctctgagtaggacaaatccgcccggagctgtccctctgttcagctactgacgggggtggtgcgtaacggcaaaagcaccg  
ccggacatcagcGCTAGCGGAGTGTATACTGGCTTACTATGTTGGCACTGATGAGGG  
TGTCAGTGAAGTGCTTCATGTGGCAGGAGAAAAAGGCTGCACCGGTGCGTC  
AGCAGAATATGTGATACAGGATATATCCGCTTCTCGCTCACTGACTCGCTA  
CGCTCGGTCGTTTCGACTGCGGCGAGCGGAAATGGCTTACGAACGGGGCGGAG  
ATTCCTGGAAGATGCCAGGAAGATACTTAACAGGGAAGTGAGAGGGGCCG  
GGCAAAGCCGTTTTTCCATAGGCTCCGCCCCCTGACAAGCATCACGAAATC  
TGACGCTCAAATCAGTGGTGGCGAAACCCGACAGGACTATAAAGATAACCAGG  
CGTTTCCCCCTGGCGGCTCCCTCGTGCCTCTCCTGTTCCCTGCCTTTCGGTTTA  
CCGGTGTCAATCCGCTGTTATGGCCGCGTTTGTCTCATTCCACGCCTGACACT  
CAGTTCCGGGTAGGCAGTTCGCTCCAAGCTGGACTGTATGCACGAACCCCC  
GTTCAGTCCGACCGCTGCGCCTTATCCGGTAACTATCGTCTTGAGTCCAACCC  
GGAAAGACATGCAAAGCACCCTGGCAGCAGCCACTGGTAATTGATTTAGA  
GGAGTTAGTCTTGAAGTCATGCGCCGGTTAAGGCTAAACTGAAAGGACAAGT  
TTTGGTACTGCGCTCCTCCAAGCCAGTTACCTCGGTTCAAAGAGTTGGTAGC  
TCAGAGAACCTTCGAAAAACCGCCCTGCAAGGCGGTTTTTTCGTTTTTCAGAGC  
AAGAGATTACGCGCAGACCAAAACGATCTCAAGAAGATCATCTTATTAatcagat  
aaaatatttctagatttcagtgcaatttatcttcaaatgtagcacctgaagtcagcccatacgatataaagtgtgaattctcatgttg  
acagcttatcatcgataagctttaatgcggtagttatcacagttaaattgtaacgcagtcaggcaccgtgtATGAAATCT  
ACAATGCGCTCATCGTCATCCTCGGCACCGTCACCCTGGATGCTGTAGGCAT  
AGGCTTGGTTATGCCGGTACTGCCGGGCTCTTGGCGGATATCGTCCATTCCG  
ACAGCATCGCCAGTCACTATGGCGTGCTGCTAGCGCTATATGCGTTGATGCA  
ATTTCTATGCGCACCCGTTCTCGGAGCACTGTCCGACCGCTTTGGCCGCCGCC  
CAGTCCTGCTCGCTTCGCTACTTGGAGCCACTATCGACTACGCGATCATGGCG  
ACCACACCCGTCTGTGGATCCTCTACGCCGGACGCATCGTGGCCGGCATCA  
CCGGCGCCACAGGTGCGGTTGCTGGCGCCTATATCGCCGACATCACCGATGG  
GGAAGATCGGGCTCGCCACTTCGGGCTCATGAGCGCTTGTTTCGGCGTGGGT  
ATGGTGGCAGGCCCGTGGCCGGGGGACTGTTGGGCGCCATCTCCTTGATG  
CACCATTCTTGCGGCGGCGGTGCTCAACGGCCTCAACCTACTACTGGGCTGC  
TTCCTAATGCAGGAGTCGCATAAGGGAGAGCGTCGACCGATGCCCTTGAGAG  
CCTTCAACCCAGTCAGCTCCTTCCGGTGGGCGCGGGGCATGACTATCGTCGCC  
GACTTATGACTGTCTTCTTTATCATGCAACTCGTAGGACAGGTGCCGGCAGC  
GCTCTGGGTCAATTTTCGGCGAGGACCGCTTTCGCTGGAGCGCGACGATGATC  
GGCCTGTCGCTTGCGGTATTCGGAATCTTGCACGCCCTCGCTCAAGCCTTCGT

CACTGGTCCCGCCACCAAACGTTTCGGCGAGAAGCAGGCCATTATCGCCGGC  
ATGGCGGCGACGCGCTGGGCTACGTCTTGCTGGCGTTCGCGACGCGAGGCT  
GGATGGCCTTCCCCATTATGATTCTTCTCGCTTCCGGCGGCATCGGGATGCC  
GCGTTGCAGGCCATGCTGTCCAGGCAGGTAGATGACGACCATCAGGGACAGC  
TTCAAGGATCGCTCGCGGCTCTTACCAGCCTAACTTCGATCATTGGACCGCTG  
ATCGTCACGGCGATTTATGCCGCTCGGCGAGCACATGGAACGGGTTGGCAT  
GGATTGTAGGCGCCGCCCTATACCTTGTCTGCCTCCCCGCGTTGCGTCGCGGT  
GCATGGAGCCGGGCCACCTCGACCTGAatggaagccggcgccacctcgctaacggattcaccctcc  
aagaattggagccaatcaattcttgcggagaactgtgaatgcgcaaaccaacccttggcagaacatccatcgctgcgccg  
cgtctccgggagctgcatgtgtcagaggtttcaccgtcatcaccgaaacgcgcgaggcagcagatcaattcgcgcggaagg  
cgaagcggcatgataatgtgctgtcaaatggacgaagcagggttctgcaaacctatgctactccgtaagecgtcaattgt  
ctgattcggttaccAAATTATGACAACTTGACGGCTACATCATTCACTTTTTCTTCACAACC  
GGCACGGAACCTCGCTCGGGCTGGCCCCGGTGCATTTTTTAAATACCCGCGAG  
AAATAGAGTTGATCGTCAAAACCAACATTGCGACCGACGGTGGCGATAGGCA  
TCCGGGTGGTGTCTCAAAGCAGCTTCGCTGGCTGATACGTTGGTCTTCGCGC  
CAGCTTAAGACGCTAATCCCTAACTGCTGGCGGAAAAGATGTGACAGACGCG  
ACGGCGACAAGCAAACATGCTGTGCGACGCTGGCGATATCAAATTGCTGTC  
TGCCAGGTGATCGCTGATGTACTGACAAGCCTCGCGTACCCGATTATCCATCG  
GTGGATGGAGCGACTCGTTAATCGCTTCCATGCGCCGCAGTAACAATTGCTC  
AAGCAGATTTATCGCCAGCAGCTCCGAATAGCGCCCTTCCCCTTGCCCGGCGT  
TAATGATTTGCCCAAACAGGTCGCTGAAATGCGGCTGGTGCCTTCATCCGG  
GCGAAAGAACCCCGTATTGGCAAATATTGACGGCCAGTTAAGCCATTCATGC  
CAGTAGGCGCGCGGACGAAAGTAAACCCACTGGTGATAACCATTGCGGAGCCT  
CCGGATGACGACCGTAGTGATGAATCTCTCCTGGCGGGAACAGCAAAATATC  
ACCCGGTCGGCAAACAATTCTCGTCCCTGATTTTTACCCACCCCTGACCGC  
GAATGGTGAGATTGAGAATATAACCTTTCATTCCCAGCGGTTCGGTCGATAAA  
AAAATCGAGATAACCGTTGGCCTCAATCGGCGTTAAACCCGCCACCAGATGG  
GCATTAACGAGTATCCCGGCAGCAGGGGATCATTTTGCGCTTCAGCCATacttt  
tcactcaccgcccattcagagaagaaccaattgtccatattgcatcagacattgccgtcactgcgtctttactggtcttctcgcta  
accaaaccgtaaccccgttattaaaagcattctgtaacaaagcgggaccaaagccatgacaaaaacgcgtaacaaaagtgc  
tataatcacggcagaaaagtcacattgattattgcacggcgtcacactttgctatgccatagcattttatccataagattagcgga  
tctactcgacgtttttatcgcaactctctactgtttctecataccggtttttgggctaacaggaggaattaaccATGGTTAG  
CAAAGGTGAAGAACTGTTTACCGGCGTTGTGCCGATTCTGGTGGAACTGGAT  
GGTGTGTGAATGGCCATAAATTTAGCGTTCGTGGCGAAGGCGAAGGTGATG  
CGACCAACGGTAAACTGACCCTGAAATTTATTTGCACCACCGGTAAACTGCC  
GGTTCCGTGGCCGACCCTGGTGACCACCCTGACCTATGGCGTTCAGTGCTTTA  
GCCGCTATCCGGATCATATGAAACGCCATGATTTCTTTAAAGCGCGATGCC  
GGAAGGCTATGTGCAGGAACGTACCATTAGCTTCAAAGATGATGGCACCTAT  
AAAACCCGTGCGGAAGTTAAATTTGAAGGCGATACCCTGGTGAACCGCATTG  
AACTGAAAGGTATTGATTTTAAAGAAGATGGCAACATTCTGGGTGATAAACT  
GGAATATAATTTCAACAGCCATTAGGTGTATATTACCGCCGATAAACAGAAA  
AATGGCATCAAAGCGAACTTTAAATCCGTCACAACGTGGAAGATGGTAGCG  
TGCAGCTGGCGGATCATTATCAGCAGAATAACCCGATTGGTGTGATGGCCCGGT  
GCTGCTGCCGGATAATCATTATCTGAGCACCCAGAGCGTTCTGAGCAAAGAT  
CCGAATGAAAAACGTGATCATATGGTGTGCTGGAATTTGTTACCGCCGCGG  
GCATTACCCACGGTATGGATGAACTGTATAAAGGCAGCCACCATCATCATCA

CCATTA Aagctcgagcgaagcttggcccgaacaaaaactcatctcagaagaggatctgaatagcgcgctcgaccatca  
tcatcatcatcattgagtttaacggtctccagcttggctgtttggcggat

**pBAD *Alv*PyIRS CAT(111TAG) GFP(150TAG)<sub>His6</sub>**

| Sequence feature                                                                            | Nucleotide position |
|---------------------------------------------------------------------------------------------|---------------------|
| p15A replication origin                                                                     | 349 - 1175          |
| TetR antibiotic resistance                                                                  | 1347 - 2537         |
| <i>glnS</i> promoter                                                                        | 2658 - 2683         |
| <i>Alv</i> PyIRS-Ser(Gly <sub>4</sub> Ser) <sub>4</sub> His <sub>6</sub> SerGlyStrep-tag II | 2725 - 3663         |
| CAT(111TAG)                                                                                 | 4140 - 4799         |
| AraC arabinose transcriptional regulator                                                    | 5278 - 6156         |
| sfGFP(150TAG) <sub>His6</sub>                                                               | 6501 - 7244         |

gagagaagatttcagcctgatacagattaaatcagaacgcagaagcggctctgataaacagaatttcgctggcggcagtagcg  
 cggtagtcccactgacccatgccgaactcagaagtgaacgcctagcggcgatggttagtggtgggtctcccactgcgaga  
 gtagggaactgccagcatcaataaacgaaaggctcagtcgaaagactggccttctgtttatctgtgtttgctgggtaacg  
 ctctctgagtaggacaaatccgcccgggagctgtccctctgttcagctactgacggggtggtgcgtaacggcaaaagcaccg  
 ccggacatcagcGCTAGCGGAGTGTATACTGGCTTACTATGTTGGCACTGATGAGGG  
 TGTCAGTGAAGTGCTTCATGTGGCAGGAGAAAAAAGGCTGCACCGGTGCGTC  
 AGCAGAATATGTGATACAGGATATATTCCGCTTCCTCGCTCACTGACTCGCTA  
 CGCTCGGTCGTTGACTGCGGCGAGCGGAAATGGCTTACGAACGGGGCGGAG  
 ATTTCTGGAAGATGCCAGGAAGATACTTAACAGGGAAGTGAGAGGGCCGC  
 GGCAAAGCCGTTTTTCCATAGGCTCCGCCCCCTGACAAGCATCACGAAATC  
 TGACGCTCAAATCAGTGGTGGCGAAACCCGACAGGACTATAAAGATAACCAGG  
 CGTTTCCCCCTGGCGGCTCCCTCGTGCCTCTCCTGTTTCTGCTTTTCGGTTTA  
 CCGGTGTCATTCCGCTGTTATGGCCGCGTTTGTCTCATTCCACGCCTGACACT  
 CAGTTCGGGTAGGCAGTTCGCTCCAAGCTGGACTGTATGCACGAACCCCCC  
 GTTCAGTCCGACCGCTGCGCCTTATCCGGTAACTATCGTCTTGAGTCCAACCC  
 GGAAAGACATGCAAAGCACCCTGGCAGCAGCCACTGGTAATTGATTTAGA  
 GGAGTTAGTCTTGAAGTCATGCGCCGGTTAAGGCTAAACTGAAAGGACAAGT  
 TTTGGTACTGCGCTCCTCCAAGCCAGTTACCTCGGTTCAAAGAGTTGGTAGC  
 TCAGAGAACCCTTCGAAAAACCGCCCTGCAAGGCGGTTTTTTCGTTTTTCAGAGC  
 AAGAGTTTACGCGCAGACCAAAACGATCTCAAGAAGATCATCTTATTAatcagat  
 aaaatatttctagatttcagtgcaatttatctctcaaatgtagcacctgaagtcagccccatac gatataagttgtaattctcatgtttg  
 acagcttatcatcgataagctttaatcggttagttatcacagttaaattgtaacgcagtcaggcaccgtgtATGAAATCT  
 AACAATGCGCTCATCGTCATCCTCGGCACCGTCACCCTGGATGCTGTAGGCAT  
 AGGCTTGGTTATGCCGGTACTGCCGGGCTCTTGCGGGATATCGTCCATTCCG  
 ACAGCATCGCCAGTCACTATGGCGTGCTGCTAGCGCTATATGCGTTGATGCA  
 ATTTCTATGCGCACCCGTTCTCGGAGCACTGTCCGACCGCTTTGGCCGCCGCC  
 CAGTCCTGCTCGCTTCGCTACTTGGAGCCACTATCGACTACGCGATCATGGCG  
 ACCACACCCGTCCTGTGGATCCTCTACGCCGGACGCATCGTGGCCGGCATCA  
 CCGGCGCCACAGGTGCGGTTGCTGGCGCTATATCGCCGACATCACCGATGG  
 GGAAGATCGGGCTCGCCACTTCGGGCTCATGAGCGCTTGTTTCGGCGTGGGT  
 ATGGTGGCAGGCCCGTGGCCGGGGGACTGTTGGGCGCCATCTCCTTGCATG  
 CACCATTCTTGCGGCGGCGGTGCTCAACGGCCTCAACCTACTACTGGGCTGC  
 TTCCTAATGCAGGAGTCGCATAAGGGAGAGCGTCGACCGATGCCCTTGAGAG

CCTTCAACCCAGTCAGCTCCTTCCGGTGGGCGCGGGGCATGACTATCGTCGCC  
GCACTTATGACTGTCTTCTTTATCATGCAACTCGTAGGACAGGTGCCGGCAGC  
GCTCTGGGTCATTTTCGGCGAGGACCGCTTTCGCTGGAGCGCGACGATGATC  
GGCCTGTCGCTTGCGGTATTCGGAATCTTGCACGCCCTCGCTCAAGCCTTCGT  
CACTGGTCCC GCCACCAAACGTTTCGGCGAGAAGCAGGCCATTATCGCCGGC  
ATGGCGGCCGACGCGCTGGGCTACGTCTTGCTGGCGTTCGCGACGCGAGGCT  
GGATGGCCTTCCCCATTATGATTCTTCTCGCTTCCGGCGGCATCGGGATGCC  
GCGTTGCAGGCCATGCTGTCCAGGCAGGTAGATGACGACCATCAGGGACAGC  
TTCAAGGATCGCTCGCGGCTCTTACCAGCCTAACTTCGATCATTGGACCGCTG  
ATCGTCACGGCGATTTATGCCGCCTCGGCGAGCACATGGAACGGGTTGGCAT  
GGATTGTAGGCGCCGCCCTATACCTTGTCTGCCTCCCCGCGTTGCGTCGCGGT  
GCATGGAGCCGGGCCACCTCGACCTGAatggaagccggcgccacctcgctaaccgattcaccactcc  
aagaattggagccaatcaattcttgcggagaactgtaatgcgcaaacccttggcagaacataggatcctcgggagTT  
GTCAGCCTGTCCCGCTTATAAGATcatacgcggtatacgtgtttacgctttgaggaatcccatATGAC  
GGTGAAATACACAGACGCGCAGATTCAGCGTTTACGCGAGTATGGAAATGGG  
ACTTACGAACAGAAGGTCTTTGAGGATCTGGCGAGTCGTGATGCAGCGTTTT  
CAAAAGAGATGTCCGTTGCGTCTACGGATAATGAGAAGAAAATCAAGGGTAT  
GATCGCCAACCCTAGTCGTCATGGGCTGACCCAATTAATGAATGACATTGCG  
GATGCCCTGGTCGCGAGAGGGTTTTATCGAAGTGCGCACTCCAATCTTTATTT  
TAAGGATGCTTTGGCACGCATGACCATCACCGAGGACAAACCATTATTTAAA  
CAGGTTTTTTGGATCGACGAAAACGTGCCTTACGCCCAATGCTGGCTCCAA  
ACCTGTATAGTGCATGCGTGATCTTCGCGATCACACAGATGGCCCTGTTAAG  
ATTTTTGAGATGGGATCTTGTTTTCGTAAGGAGTCACATTCTGGCATGCATCT  
GGAAGAGTTTACGATGCTTAATCTGGTCGATATGGGGCCTCGCGGCGACGCG  
ACTGAAGTATTGAAGAATTACATTAGCGTAGTTATGAAGGCAGCCGGGCTTC  
CTGACTATGACTTGGTCCAAGAAGAGTCGGATGTATATAAGGAAACTATCGA  
TGTTGAGATCAACGGACAAGAAGTTTGCAGCGCGGCGGTAGGTCCCCATTAC  
CTGGATGCCGCTCACGATGTTACAGAGCCTTGGAGCGGCGCGGGTTTTCGGCC  
TTGAACGCCTTTTAACTATCCGCGAGAAATATTCCACCGTGAAAAAGGGCGG  
CGCGTCAATCTCCTATCTGAATGGGGCCAAAATTAATAGCGGAGGGGGAGGG  
TCTGGAGGGGGGGGTAGTGGAGGAGGCGGCTCCGGAGGCGGTGGTTCACAT  
CACCATCACCATCACTCTGGATGGAGCCACCCGCAGTTCGAAAAATAActgcagt  
tcaaacgctaaattgctgatgcgctacgcttatcaggcctacatgatctctgcaatatattgagtttgcgtgcttttaggcccga  
taaggcgttacgcccacccggcaagaacagcaacaatccaaaacgcccgcgttcggcggtcgacattaacgaagcgcta  
accgttttatcatgctctgggaggcagaataaatgatcatatcgtaattattacctccacgggagagcctgagcaaacggcct  
caggcattgagaagcacacggtcacactgctccggtagtcataaacggtaaacagcaatagacataagcggctatttaac  
gacctgccctgaaccgacgaccgggtcgaatttgcttcgaatttctgccattcaccgcttattatcacttaccaggcgtagcaa  
ccaggcgtttaagggcaccaataactgccttaaaaaaaTTACGCCCCGCCCTGCCACTCATCGCAGT  
ACTGTTGTAATTCATTAAGCATTCTGCCGACATGGAAGCCATCACAAACGGC  
ATGATGAACCTGAATCGCCAGCGGCATCAGCACCTTGTGCGCTTGCGTATAAT  
ATTTGCCCATGGTGAAAACGGGGGCGAAGAAGTTGTCCATATTGGCCACGTT  
TAAATCAAACTGGTGAAACTCACCCAGGGATTGGCTGAGACGAAAACATA  
TTCTCAATAAACCTTTAGGGAAATAGGCCAGGTTTTACCGTAACACGCCAC  
ATCTTGCGAATATATGTGTAGAACTGCCGAAATCCTAGTGGTATTCACTCC  
AGAGCGATGAAAACGTTTCAGTTTGTCTCATGGAAAACGGTGTAACAAGGGTG  
AACACTATCCCATATACCAGCTCACCGTCTTTCATTGCCATACGGAATTCCG

GATGAGCATTTCATCAGGCGGGCAAGAATGTGAATAAAGGCCGGATAAACTT  
GTGCTTATTTTTCTTTACGGTCTTTAAAAAGGCCGTAATATCCAGCTGAACGG  
TCTGGTTATAGGTACATTGAGCAACTGACTGAAATGCCTCAAAATGTTCTTTA  
CGATGCCATTGGGATATATCAACGGTGGTATATCCAGTGATTTTTTTCTCCATt  
ttagcttccttagctcctgaaaatctcgataactcaaaaaatagccccgtagtgatcttatttcattatggtgaaagttggaacctctt  
acgtgccgatcaacgtctcattttcgccaaaagttggcccagggctccccggtatcaacagggacaccaggattatttattctgcg  
aagtgatctccgtcacaggtatttattcgccgcaaagtgcgtcgggtgatgctccaacttactgatttagtgatgatggtgtttt  
gaggtgctccagtggtctctgtttctatcgtctccgggagctgcatgtgctcagaggtttccaccgcatcaccgaaacgcgaggg  
cagcagatcaattcgcgcgcaaggcgaagcggcatgcataatgtgcctgtcaaatggacgaagcagggattctgcaaacct  
atgtactccgtaagcgtcaattgtctgattcgttaccaaTTATGACAACCTTGACGGCTACATCATT  
ACTTTTTCTTACAACCGGCACGGAACCTCGCTCGGGCTGGCCCCGGTGCATTT  
TTAAATACCCGCGAGAAATAGAGTTGATCGTCAAACCAACATTGCGACCG  
ACGGTGGCGATAGGCATCCGGGTGGTGTCTCAAAGCAGCTTCGCCTGGCTGA  
TACGTTGGTCTCGCGCCAGCTTAAGACGCTAATCCCTAACTGCTGGCGGAA  
AAGATGTGACAGACGCGACGGCGACAAGCAAACATGCTGTGCGACGCTGGC  
GATATCAAATTGCTGTCTGCCAGGTGATCGCTGATGTACTGACAAGCCTCGC  
GTACCCGATTATCCATCGGTGGATGGAGCGACTCGTTAATCGCTTCCATGCGC  
CGCAGTAACAATTGCTCAAGCAGATTTATCGCCAGCAGCTCCGAATAGCGCC  
CTTCCCCTTGCCCCGGCGTTAATGATTTGCCCAAACAGGTCGCTGAAATGCGGC  
TGGTGCCTTCATCCGGGCGAAAGAACCCCGTATTGGCAAATATTGACGGCC  
AGTTAAGCCATTCATGCCAGTAGGCGCGCGGACGAAAGTAAACCCACTGGTG  
ATACCATTCGCGAGCCTCCGGATGACGACCGTAGTGATGAATCTCTCCTGGC  
GGGAACAGCAAATATCACCCGGTCGGCAAACAATTCTCGTCCCTGATTTT  
TCACCACCCCTGACCGCGAATGGTGAGATTGAGAATATAACCTTTCATTCCC  
AGCGGTCGGTCGATAAAAAAATCGAGATAACCGTTGGCCTCAATCGGCGTTA  
AACCCGCCACCAGATGGGCATTAACGAGTATCCCGGCAGCAGGGGATCATT  
TTGCGCTTCAGCCATacttttcatactcccgccattcagagaagaaaccaattgtccatattgcatcagacattgccgt  
cactgcgtctttactggctctctcgttaaccaaaccggtaaccccgcttattaaaagcattctgtaacaaagcggggaccaaaagcc  
atgacaaaaacgcgtaacaaaagtgctataatcacggcagaaaagtcacattgattattgcacggcgtcacactttgctatgc  
catagcattttatccataagattagcggatcctacctgacgctttttatcgcaactctactgtttctccataaccggtttttgggctaa  
caggaggaattaaccATGGTTAGCAAAGGTGAAGAACTGTTTACCGGCGTTGTGCCGA  
TTCTGGTGGAACTGGATGGTGTATGTGAATGGCCATAAATTTAGCGTTCGTGGC  
GAAGGCGAAGGTGATGCGACCAACGGTAAACTGACCCTGAAATTTATTTGCA  
CCACCGGTAAACTGCCGGTTCCTGTGGCCGACCCTGGTGACCACCCTGACCTA  
TGCGGTTCAAGTCTTTAGCCGCTATCCGGATCATATGAAACGCCATGATTTCT  
TTAAAAGCGCGATGCCGGAAGGCTATGTGCAGGAACGTACCATTAGCTTCAA  
AGATGATGGCACCTATAAAACCCGTGCGGAAGTTAAATTTGAAGGCGATACC  
CTGGTGAACCGCATTGAACTGAAAGGTATTGATTTTAAAGAAGATGGCAACA  
TTCTGGGTCATAAACTGGAATATAATTTCAACAGCCATTAGGTGTATATTACC  
GCCGATAAACAGAAAAATGGCATCAAAGCGAACTTTAAAATCCGTCACAACG  
TGGAAGATGGTAGCGTGCAGCTGGCGGATCATTATCAGCAGAATAACCCGAT  
TGGTGTATGGCCCGGTGCTGCTGCCGGATAATCATTATCTGAGCACCAGAGC  
GTTCTGAGCAAAGATCCGAATGAAAAACGTGATCATATGGTGCTGCTGGAAT  
TTGTTACCGCCGCGGGCATTACCCACGGTATGGATGAACTGTATAAAGGCAG  
CCACCATCATCATCACCATTAAGctcgagcgaagcttgggcccgaacaaaaactcatctcagaagagga  
tctgaatagcgcctgcaccatcatcatcatcattgatttaaacggtctccagcttggctgtttggcgat

## pKW1 TRIPLE

| Sequence feature                                                          | Nucleotide position |
|---------------------------------------------------------------------------|---------------------|
| <i>glnS</i> promoter                                                      | 14 - 39             |
| <i>MmPylRS-S(G<sub>4</sub>S)<sub>4</sub>linker-FLAG</i>                   | 81 - 1455           |
| <i>IR26PylRS(CbzK)</i>                                                    | 1585 - 2412         |
| <i>LumIPylRS(NmH)</i>                                                     | 2423 - 3250         |
| <i>lpp</i> promoter                                                       | 3785 - 3809         |
| <i>Spe</i> <sup>Pyl</sup> tRNA <sub>CUA</sub>                             | 3830 - 3901         |
| <i>Int</i> <sup>ΔNPyl</sup> tRNA( <sup>A17, V C10</sup> ) <sub>UCCU</sub> | 3941 - 4013         |
| <i>Alv</i> <sup>ΔNPyl</sup> tRNA(8) <sub>UACU</sub>                       | 4058 - 4130         |
| rrnC terminator                                                           | 4137 - 4165         |
| SpR antibiotic resistance                                                 | 4850 - 5711         |
| pMB1 replication origin                                                   | 5797 - 6385         |

ggatcctcgggagTTGTCAGCCTGTCCCGCTTATAAGATcatacgcggtatacgtgtttacgctttgag  
 gaateccatATGATGGACAAAAACCGCTGAACACCCTGATCTCTGCTACCGGTCT  
 GTGGATGTCTCGTACCGGTACCATCCACAAAATCAAACACCACGAAGTTTCT  
 CGTTCTAAAATCTACATCGAAATGGCTTGCGGTGACCACCTGGTTGTAAACAA  
 CTCTCGTTCTTCTCGTACCGCTCGTGCTCTGCGTCACCACAAATACCGTAAAA  
 CCTGCAAACGTTGCCGTGTTTCTGACGAAGACCTGAACAAATTCCTGACCAA  
 AGCTAACGAAGACCAGACCTCTGTTAAAGTTAAAGTTGTTTCTGCTCCGACCC  
 GTACCAAAAAAGCTATGCCGAAATCTGTTGCTCGTGCTCCGAAACCGCTGGA  
 AACACCCGAAGCTGCTCAGGCTCAGCCGTCTGGTTCTAAATTCTCTCCGGCTA  
 TCCCGGTTTCTACCCAGGAATCTGTTTCTGTTCCGGCTTCTGTTTCTACCTCTA  
 TCTCTTCTATCTCTACCGGTGCTACCGCTTCTGCTCTGGTTAAAGGTAACACC  
 AACCCGATCACCTCTATGTCTGCTCCGGTTCAGGCTTCTGCTCCGGCTCTGAC  
 CAAATCTCAGACCCGACCGTCTGGAAGTTCTGCTGAACCCGAAAGACGAAATC  
 TCTCTGAACCTCTGGTAAACCGTTCGGTGAACCTGGAATCTGAACCTGCTGTCTCG  
 TCGTAAAAAAGACTTACAACAGATCTACGCTGAAGAACGTGAAAACCTACCTG  
 GGTAACCTGGAACGTGAAATCACGCGTTTCTTCGTTGACCGTGGTTTCCTGGA  
 AATCAAATCTCCGATCCTGATCCCGCTGGAATACATCGAACGTATGGGTATC  
 GACAACGACACCGAACTGTCTAAACAGATCTTCCGTGTTGACAAAAACTTCT  
 GCCTGCGTCCGATGCTGGCTCCGAACCTGTACAACCTACCTGCGTAAACTGGA  
 CCGTGCTCTGCCGGACCCGATCAAATCTTCGAAATCGGTCCGTGCTACCGTA  
 AAGAATCTGACGGTAAAGAACACCTGGAAGAATTCACCATGCTGAACTTCTG  
 CCAGATGGGTTCTGGTTGCACCCGTGAAAACCTGGAATCTATCATCACCGACT  
 TCCTGAACCACCTGGGTATCGACTTCAAATCGTTGGTGACTCTTGCATGGTT  
 TACGGTGACACCCCTGGACGTTATGCACGGTGACCTGGAACCTGTCTTCTGCTGT  
 TGTTGGTCCGATCCCGCTGGACCGTGAATGGGGTATCGACAAACCGTGGATC  
 GGTGCTGGTTTCGGTCTGGAACGTCTGCTGAAAGTTAAACACGACTTCAAAA  
 ACATCAAACGTGCTGCTCGTTCTGAATCTTACTACAACGGTATCTCTACCAAC  
 CTGTCTGGTGGCGGTGGCTCTGGTGGCGGTGGCTCTGGTGGCGGTGGCTCTGG  
 TGGCGGTGGCTCTGACTACAAGGACGACGACGACAAGTAAcctattgaagggttgctaag  
 aataacaagatcaaataaggaggtttttATGGCAGAACATTTTACAGATGCACAGATTCAGCG



CTTACGCGAGTATGGTAATGGGACATATAAGGATATGGAGTTCGCAGACGTG  
AGTGCGCGTGAAAAGGCGTTCACGAAGCTTATGTCTGATGCCAGTCGCGATA  
ATGAATCAGCCCTTAAGGGAATGATTGCGCACCCCTGCACGCCAGGGTTTATC  
ACGCTTAATGAATGACATTGCAGACGCTTTGGTGGCTGATGGATTTATTGAAG  
TTCGCACACCCATTATTATCAGTAAAGATGCTTTAGCCAAAATGACAATCACT  
CCCGATAAACCATTATTCAAACAAGTATTTTGGATTGATGATAAACGCGCTCT  
GCGTCCAATGTTAGCCCCGTCTCTGGGCACGGTCTGCGTAGCCTGCGTGATC  
ATACTGACGGCCCTGTCAAATTTTCGAAATGGGCTCTTGTTTTTCGCAAAGAA  
TCGCACAGTGGGATGCACCTGGAAGAGTTTACCATGTTAAACCTGGTAGATA  
TGGGCCCCGCCGGCGATGCCACTGAGTCCCTGAAGAAATATATTGGGATCGT  
AATGAAGGCCGCCGGGCTGCCTGACTACCAATTAGTCCACGAGGAATCTGAT  
GTGTATAAAGAAACGATTGATGTTGAAATCAACGGACAAGAGGTTTGTTCGG  
CTGCTGTAGGTCCTCACTATTTGGATGCCGCCATGACGTGCACGAGCCGTGG  
GCAGGGGCAGGGTTCGGCCTGGAGCGCCTGCTGACAATTCGCCAGGGATATA  
GCACAGTGATGAAAGGGGGAGCTTCCACAACCTATTTGAACGGGGCTAAGAT  
GGACTAaggaggacatcATGGATACACGCCTGACGCCCGCGCAAGCTCAGCGCAT  
TCGTGAAATGGGCGGGACGGTAGACCCGTCGTTAGCCTTTAGCAGCGAAGCC  
GAACGTGAATCGGCATTTACGCGTATTTTCGGCAGATTTGCAGGGGGCGAACT  
TGCCAAGATTCGTGCTGTGCTGAAGCGCCAGAGCGCCATCCAATCGGTAG  
TCTGGAAAATACCCTGGCCTGCGCACTGGCGGCTAAGGGGTTTATTGAGGTT  
AAGACGCCGATGATGATTCCTGCAGACGGACTGGTGAAAATGGGTATTGACG  
AGTCTCATCCATTATGGAATCAAGTTTTTTGGGTCGGCCCGAAAAAAGCACTG  
CGTCCGATGATGGCTCCAAACATTTTCTTTTTGGCGCGCCACTTACGTCGTTCT  
GTGCCCCGCCCACTTACTTCTTTTTGAAATTGGACCTTGTTTCCGCAAGGAGAG  
CCGCGGGTCCAATCATCTGGAGGAGTTTACTATGTTGAACTTATTTGAGTTAG  
CTCCACAAGCTGACGCTACAGAACGCTTAAAAGAACACATTGCCACAGTGAT  
GAATGCTGTTGGACTGCCCTACGAGTTAGTAGTCGAGGGTTCTGAAGTTTATG  
GCACTACGATTGATGTGGAAGTAGACGGTGTGAGCTGGCATCTGGCGCAGT  
AGGACCGTTACCTATGGATAAACCTCACGGGATTACCGAGCCCTGGGCTGGT  
GTTGGGTTTCGGATTGGAGCGTATTGCATTAATGCGCACGAAGGAGCAAATA  
TCAAAAAGTAGGACGCTCCTTGGTTTTATGTTAATGGAGCCCGCATTGATATT  
TAActgcagttcaaacgctaaattgcctgatgcgctacgcttatcaggcctacatgatctctgcaatattgagtttgcgtgctt  
ttagggccgataaggcggtcacgcccgcacccgcaagaacagcaacaatccaaacgcccgcggttcggcggtcgacaca  
gatgtaggtgtccacagggtagccagcagcctcctcgatgcagatccggaacataatggtgcagggcgcttgttcggcggtg  
ggtatggtggcaggccccgtggccgggggactgttggcgctgcccgcacctgtcctacgagttgcatgataaagaagacagt  
cataagtgcggcgacgatagtcacccccgcccaccggaaggagctaccggcagcggtgaggactgttgaactcagaat  
aagaaatgaggccgctcatggcggttctgttccccgtctcactggtgaaaagaaaaacaacctggcgccgcttctttgagcgaac  
gatcaaaaataagtggcgccccatcaaaaaataTTCTCAACATAAAAACTTTGTGTAatacttgaac  
gtagatctGAAATCTGATCATGTAGATCGAATGGACTCTAAATCCGTTTCAGCCG  
GGTTAGATTCCCGGGGTTTCCGCCAaattttgaccagcaacttggtacgtaaacgcacgtGGCG  
AACTGGTCCGGGACCACCAGGCCTTCTAAGCCACGGTTAGCCGGGTTCAAC  
TCCCGGGTTCGTGCCAactactttatgtagtctccgcccgttagcaagaattgagaagtGGGGGACGG  
TCCGGCGACCAGCGGGTCTTACTAAACCTAGCCTTGCGGGGTTTCGACACCCC  
GGTCTCTCGCCAactagtATCCTTAGCGAAAGCTAAGGATTTTTTTTTaagcttggcactgg  
ccgctggtttacaacgctgactgggaaaacctggcggttaccacactaatcgcttgcagcacatcccccttccgacagcgc  
ctcccttatgcgactcctgcattaggaagcagcccagtagtaggttagggcggtgagcaccgcccgcgaaggaatggtgca

tgcaaggagccccgagatgcgccgctgctggagatggcggacgcgatggatatgttctggcggccgcataatgctta  
 agtcgaacagaaagtaacgtattgtacacggccgcataatcgaaattaaattggatatcggcAggccacgcgatcgtgacgt  
 cggtagcctcagctcgtgtaagaaaccgctgctgcgaaattgaacgccagcacatggactcgtctactagcgcagcttaatta  
 acctaggctgctgccaccgctgagcaataactagcataaacccctggggcctctaaacgggtcttgaggggtttttgctgaaacc  
 tcaggcattgagaagcacacggtcacactgctccggtagtcaataaacggtaaaccagcaatagacataagcggctatttaa  
 cgacctgcctgaaccgacgaccgggtcatcgtggccgatcttgcggccctcggcttgaacgaattgtagacaTTAT  
 TTGCCGACTACCTTGGTGATCTCGCCTTTCACGTAGTGGACAAATTCTTCCAA  
 CTGATCTGCGCGCGAGGCCAAGCGATCTTCTTCTTGTCCAAGATAAGCCTGTC  
 TAGCTTCAAGTATGACGGGCTGATACTGGGCCGGCAGGCGCTCCATTGCCCA  
 GTCGGCAGCGACATCCTTCGGCGCGATTTTGCCGGTTACTGCGCTGTACCAA  
 TGCGGGACAACGTAAGCACTACATTTTCGCTCATCGCCAGCCCAGTCGGGCGG  
 CGAGTTCCATAGCGTTAAGGTTTCATTTAGCGCCTCAAATAGATCCTGTTCAG  
 GAACCGGATCAAAGAGTTCCTCCGCCGCTGGACCTACCAAGGCAACGCTATG  
 TTCTCTTGCTTTTGTGTCAGCAAGATAGCCAGATCAATGTCGATCGTGGCTGGCT  
 CGAAGATACCTGCAAGAATGTCATTGCGCTGCCATTCTCCAAATTGCAGTTCG  
 CGCTTAGCTGGATAACGCCACGGAATGATGTCGTCGTGCACAACAATGGTGA  
 CTTCTACAGCGCGGAGAATCTCGCTCTCTCCAGGGGAAGCCGAAGTTTCCAA  
 AAGGTCGTTGATCAAAGCTCGCCGCGTTGTTTCATCAAGCCTTACGGTCACCG  
 TAACCAGCAAATCAATATCACTGTGTGGCTTCAGGCCGCCATCCACTGCGGA  
 GCCGTACAAATGTACGGCCAGCAACGTCGGTTCGAGATGGCGCTCGATGACG  
 CCAACTACCTCTGATAGTTGAGTCGATACTTCGGCGATCACCGCTTCCCTCAT  
 ACTCTTCCCTTTTTCAATATTATTGAAGCATTTATCAGGGTTATTGTCTCATGAG  
 CGGATACATATTTGAAAtgtattgaaaaataaacaatagctagcagcaaaaaggccagcaaaaaggccagga  
 accgtaaaaaggccggtgctggcggtTTTCCATAGGCTCCGCCCCCTGACGAGCATCACA  
 AAAATCGACGCTCAAGTCAGAGGTGGCGAAACCCGACAGGACTATAAAGAT  
 ACCAGGCGTTTCCCCCTGGAAGCTCCCTCGTGCCTCTCCTGTTCCGACCCTG  
 CCGCTTACCGGATACCTGTCCGCTTTCTCCCTTCGGGAAGCGTGGCGCTTTC  
 TCATAGCTCACGCTGTAGGTATCTCAGTTCGGTGTAGGTCGTTTCGCTCCAAGC  
 TGGGCTGTGTGCACGAACCCCCGTTTCAGCCCGACCGCTGCGCCTTATCCGGT  
 AACTATCGTCTTGAGTCCAACCCGTAAGACACGACTTATCGCCACTGGCAG  
 CAGCCACTGGTAACAGGATTAGCAGAGCGAGGTATGTAGGCGGTGCTACAGA  
 GTTCTTGAAGTGGTGGCCTAACTACGGCTACACTAGAAGGACAGTATTTGGT  
 ATCTGCGCTCTGCTGAAGCCAGTTACCTTCGGAAAAAGAGTTGGTAGCTCTTG  
 ATCCGGCAAACAACCACCGCTGGTAGCGGTGGTTTTTTTTGTTTGCAAGCAGC  
 AGATTACGCGCAGAAAAAAGGATCTCAAgaagatccttgatctttctacggggtctgacgctcag  
 tggaacgaaaactcacgttaaggattttgg

**pCUN\_O-Strep-sfGFP-40TAG-136AGGA-150AGTA**

| <b>Sequence feature</b>    | <b>Nucleotide position</b> |
|----------------------------|----------------------------|
| TetR antibiotic resistance | 419 - 1603                 |
| p15A replication origin    | 1778 - 2604                |
| Promoter                   | 2957 - 2986                |
| O-RBS                      | 3007 - 3014                |
| O-Strep-                   | 3021 - 3796                |

sfGFP(40TAG,136AGGA,150AGTA)

ggtaccggttccactctctgttgccgggcaacttcagcagcacgtaggggacttccgcggttccagactttacgaaacacggaaac  
cgaagaccattcatgtgtgtcaggtcgcagacgttttcagcagcagtcgcttcaagttcgcgcgtatcggtgattcattctg  
ctaaccagtaaggcaaccccgccagcctagccgggtcctcaacgacaggagcacgatcatgcgaccccggtggccaggacc  
aacgctgcccagatgcgccgctgcccgtgctggagatggcggacgcgatggatatgttctgccaagggttggttgcgcat  
cacagttctccgcaagaattgattggctccaattcttgagtggtgaatccgttagcgaggtgccgcccgttccatcaGGTC  
GAGGTGGCCCGGCTCCATGCACCGCGACGCAACGCGGGGAGGCAGACAAGG  
TATAGGGCGGCGCCTACAATCCATGCCAACCCGTTCCATGTGCTCGCCGAGG  
CGGCATAAATCGCCGTGACGATCAGCGGTCCAGTGATCGAAGTTAGGCTGGT  
AAGAGCCGCGAGCGATCCTTGAAGCTGTCCCTGATGGTCGTCATCTACCTGC  
CTGGACAGCATGGCCTGCAACGCGGGCATCCCGATGCCGCCGGAAGCGAGA  
AGAATCATAATGGGGAAGGCCATCCAGCCTCGCGTCGCGAACGCCAGCAAG  
ACGTAGCCCAGCGCGTCGGCCGCCATGCCGGCGATAATGGCCTGCTTCTCGC  
CGAAACGTTTGGTGGCGGGACCAGTGACGAAGGCTTGAGCGAGGGCGTGCA  
AGATTCCGAATACCGCAAGCGACAGGCCGATCATCGTCGCGCTCCAGCGAAA  
GCGGTCTCGCCGAAAATGACCCAGAGCGCTGCCGGCACCTGTCCTACGAGT  
TGCATGATAAAGAAGACAGTCATAAGTGCGGCGACGATAGTCATGCCCCGCG  
CCCACCGGAAGGAGCTGACTGGGTTGAAGGCTCTCAAGGGCATCGGTCGACG  
CTCTCCCTTATGCGACTCCTGCATTAGGAAGCAGCCAGTAGTAGGTTGAGGC  
CGTTGAGCACCGCCCGCCGAAGGAATGGTGCATGCAAGGAGATGGCGCCCA  
ACAGTCCCCCGGCCACGGGGCCTGCCACCATACCACGCCGAAACAAGCGCT  
CATGAGCCCGAAGTGGCGAGCCCGATCTTCCCCATCGGTGATGTCGGCGATA  
TAGGCGCCAGCAACCGCACCTGTGGCGCCGGTGTGATGCCGGCCACGATGCGTC  
CGGCGTAGAGGATCCACAGGACGGGTGTGGTCGCCATGATCGCGTAGTCGAT  
AGTGGCTCCAAGTAGCGAAGCGAGCAGGACTGGGCGGCGGCCAAAGCGGTC  
GGACAGTGCTCCGAGAACGGGTGCGCATAGAAATTGCATCAACGCATATAGC  
GCTAGCAGCACGCCATAGTGACTGGCGATGCTGTCGGAATGGACGATATCCC  
GCAAGAGGCCCGGCAGTACCGGCATAACCAAGCCTATGCCTACAGCATCCAG  
GGTGACGGTGCCGAGGATGACGATGAGCGCATTGTTAGATTTcatacacggtgcctga  
ctgcgtagcaatttaactgtgataaactaccgcattaaagcttatcagatgataagctgtcaaacatgagaattacaacttatatcgta  
tggggtgacttcaggtgctacattgaagagataaattgcactgaaatctagaatattttatctgatTAATAAGATGAT  
CTTCTTGAGATCGTTTTGGTCTGCGCGTAATCTCTTGCTCTGAAAACGAAAA  
ACCGCCTTGCAGGGCGGTTTTTCGAAGGTTCTCTGAGCTACCAACTCTTTGAA  
CCGAGGTAACCTGGCTTGGAGGAGCGCAGTCACCAAACTTGTCTTTTTCAGTTT  
AGCCTTAACCGGCGCATGACTTCAAGACTAACTCCTCTAAATCAATTACCAGT  
GGCTGCTGCCAGTGGTGTCTTTTGCATGTCTTTCCGGGTTGGACTCAAGACGAT  
AGTTACCGGATAAAGGCGCAGCGGTGCGACTGAACGGGGGGTTCGTGCATACA  
GTCCAGCTTGGAGCGAACTGCCTACCCGGAACCTGAGTGTCAGGCGTGGAATG  
AGACAAACGCGGCCATAACAGCGGAATGACACCGGTAAACCGAAAGGCAGG  
AACAGGAGAGCGCACGAGGGAGCCGCCAGGGGGAAACGCCTGGTATCTTTA  
TAGTCCTGTGCGGTTTTCGCCACCACTGATTTGAGCGTCAGATTTCTGTGATGCT  
TGTCAGGGGGGCGGAGCCTATGGAAAAACGGCTTTGCCGCGGCCCTCTCACT  
TCCCTGTTAAGTATCTTCTGGCATCTTCCAGGAAATCTCCGCCCCCGTTCGTA  
AGCCATTTCCGCTCGCCGCAGTCGAACGACCGAGCGTAGCGAGTCAGTGAGC  
GAGGAAGCGGAATATATCCTGTATCACATATTCTGCTGACGCACCGGTGCAG

CCTTTTTTCTCCTGCCACATGAAGCACTTCACTGACACCCTCATCAGTGCCAA  
CATAGTAAGCCAGTATACTCCGCTAGCgctgatgtccggcggtgctttgcccgttacgccacc  
ccgtcagtagctgaacaggaggacagctgatagaacagaagccactggagcacctcaaaaacacatcatacactaaatca  
gtaagtggcagcatcacccgacgcactttgcccgaataaatacctgtgacggaagatcacttcgagaataaataatcctgg  
tgtccctgttgataccgggaagccctgggccaactttggcgaaaatgagacgttgatcggcacgtagggccctctagatgcatg  
ctcgagcggcgccagtgatgatatctgcagaattcgccctcaaaaatcgatgagctGTTGACAATTAATCA  
TCGAACTAGTTTAAATgtgtggaagcggccgctttcATATCCCTccgcaaATGTGGAGCCACC  
CGCAGTTCGAAAAAtctggaGTTAGCAAAGGTGAAGAACTGTTTACCGGCGTTG  
TGCCGATTCTGGTGGAACTGGATGGTGTGATGTGAATGGCCATAAATTTAGCGTT  
CGTGGCGAAGGCGAAGGTGATGCGACCTAGGGTAAACTGACCCTGAAATTTA  
TTTGCACCACCGGTAAACTGCCGGTTCCTGGCCGACCCTGGTGACCACCCTG  
ACCTATGGCGTTCAGTGCTTTAGCCGCTATCCGGATCATATGAAACGCCATGA  
TTTCTTTAAAAGCGCGATGCCGGAAGGCTATGTGCAGGAACGTACCATTAGC  
TTCAAAGATGATGGCACCTATAAAACCCGTGCGGAAGTTAAATTTGAAGGCG  
ATACCCTGGTGAACCGCATTGAACTGAAAGGTATTGATTTTAAAGAAGATGG  
CAGGAATTCTGGGTCATAAACTGGAATATAATTTCAACAGCCATAGTAGTGT  
ATATTACCGCCGATAAACAGAAAAATGGCATCAAAGCGAACTTTAAAATCCG  
TCACAACGTGGAAGATGGTAGCGTGCAGCTGGCGGATCATTATCAGCAGAAT  
ACCCCGATTGGTGTGATGGCCCGGTGCTGCTGCCGGATAATCATTATCTGAGCAC  
CCAGAGCGTTCTGAGCAAAGATCCGAATGAAAAACGTGATCATATGGTGCTG  
CTGGAATTTGTTACCGCCGCGGGCATTACCACGGTATGGATGAACTGTATA  
AAGGCAGCCACCATCATCACCATTAAaatgataaagaattcgaagctgggcccgaacaaaa  
ctcatctcagaagagatctgaatagcgcctcgaccatcatcatcatcattgagttaaacgacgtccagcttggtgcttttgg  
cggatgagagaagattttcagcctgatacagattaaatcagaacgcagaagcggctgataaacagaatttgctggcggcag  
tagcgcggtggtcccactgacccatgccgaactcagaagtgaaacgccgtagcgcgatggtagtgtgaggcctccatgc  
gagagtagggaactgccagcatcaataaaacgaaaggctcagtcgaaagactgggcctttcgtttatctgtgttgcggtg  
aacgatctgctttctcgcgaatgagctc

**pCUN\_O-GST-CAM(1TAG)**

| <b>Sequence feature</b>    | <b>Nucleotide position</b> |
|----------------------------|----------------------------|
| TetR antibiotic resistance | 419 - 1603                 |
| p15A replication origin    | 1778 - 2604                |
| lac promoter               | 2969 - 2999                |
| O-RBS                      | 3033 - 3039                |
| O-GST-CAM(1TAG)-Strep      | 3046 - 4212                |
| rrnB T1 terminator         | 4433 - 4479                |

ggtaccggttccactctctgttgcgggcaacttcagcagcacgtaggggactccgcggttccagactttacgaaacacggaaac  
cgaagaccattcatgtgtgtcaggtcgagacggtttgcagcagcagtcgcttcacgttcgctcgcgtatcgggtgattcattctg  
ctaaccagtaaggcaaccccgccagcctagccgggtcctcaacgacaggagcacgatcatgcgaccccggtggccaggacc  
aacgctgcccagatgcgccgctgctggagatggcggacgcgatggatatgttctccaaggggtggttgcgcatt  
cacagttctccgcaagaattgattggcttaattcttgagtggtgaatccggttagcagaggtccgcccgttccattcaGGTC  
GAGGTGGCCCGGCTCCATGCACCGCGACGCAACGCGGGGAGGCAGACAAGG  
TATAGGGCGGCGCCTACAATCCATGCCAACCCGTTCCATGTGCTCGCCGAGG

CGGCATAAATCGCCGTGACGATCAGCGGTCCAGTGATCGAAGTTAGGCTGGT  
AAGAGCCGCGAGCGATCCTTGAAGCTGTCCCTGATGGTCGTCATCTACCTGC  
CTGGACAGCATGGCCTGCAACGCGGGCATCCCGATGCCGCCGGAAGCGAGA  
AGAATCATAATGGGGAAGGCCATCCAGCCTCGCGTCGCGAACGCCAGCAAG  
ACGTAGCCCAGCGCGTCGGCCGCCATGCCGGCGATAATGGCCTGCTTCTCGC  
CGAAACGTTTGGTGGCGGGACCAGTGACGAAGGCTTGAGCGAGGGCGTGCA  
AGATTCCGAATACCGCAAGCGACAGGCCGATCATCGTCGCGCTCCAGCGAAA  
GCGGTCTCGCCGAAAATGACCCAGAGCGCTGCCGGCACCTGTCCTACGAGT  
TGCATGATAAAGAAGACAGTCATAAGTGCGGCGACGATAGTCATGCCCCGCG  
CCCACCGGAAGGAGCTGACTGGGTTGAAGGCTCTCAAGGGCATCGGTGACG  
CTCTCCCTTATGCGACTCCTGCATTAGGAAGCAGCCAGTAGTAGGTTGAGGC  
CGTTGAGCACCGCCCGCAAGGAATGGTGCATGCAAGGAGATGGCGCCCA  
ACAGTCCCCCGGCCACGGGGCCTGCCACCATAACCCACGCCGAAACAAGCGCT  
CATGAGCCCGAAGTGGCGAGCCCGATCTTCCCCATCGGTGATGTGCGCGATA  
TAGGCGCCAGCAACCGCACCTGTGGCGCCGGTGCATGCCGGCCACGATGCGTC  
CGGCGTAGAGGATCCACAGGACGGGTGTGGTCGCCATGATCGCGTAGTCGAT  
AGTGGCTCCAAGTAGCGAAGCGAGCAGGACTGGGCGGCGGCCAAAGCGGTC  
GGACAGTGCTCCGAGAACGGGTGCGCATAGAAATTGCATCAACGCATATAGC  
GCTAGCAGCACGCCATAGTGACTGGCGATGCTGTCGGAATGGACGATATCCC  
GCAAGAGGCCCGGCAGTACCGGCATAACCAAGCCTATGCCTACAGCATCCAG  
GGTGACGGTGCCGAGGATGACGATGAGCGCATTGTTAGATTTcatacacggtgctga  
ctcggttagcaatttaactgtataaactaccgcattaaagcttatcgatgataagctgtcaaacatgagaattacaacttatatcgta  
tggggtgacttcagtgctacattgaagagataaattgcactgaaatctagaatatatttatctgatTAATAAGATGAT  
CTTCTTGAGATCGTTTTGGTCTGCGCGTAATCTCTTGCTCTGAAAACGAAAA  
ACCGCCTTGCAGGGCGGTTTTTCGAAGGTTCTCTGAGCTACCAACTCTTTGAA  
CCGAGGTAACCTGGCTTGGAGGAGCGCAGTCACCAAAACTTGTCTTTTTCAGTTT  
AGCCTTAACCGGCGCATGACTTCAAGACTAACTCCTCTAAATCAATTACCAGT  
GGCTGCTGCCAGTGGTGCTTTTGCATGTCTTTCCGGGTTGGACTCAAGACGAT  
AGTTACCGGATAAGGCGCAGCGGTGCGACTGAACGGGGGGTTCGTGCATACA  
GTCCAGCTTGGAGCGAACTGCCTACCCGGAAGTGAAGTGTGAGGCGTGGAATG  
AGACAAACGCGGCCATAACAGCGGAATGACACCGGTAAACCGAAAGGCAGG  
AACAGGAGAGCGCACGAGGGAGCCGCCAGGGGAAACGCCTGGTATCTTTA  
TAGTCCTGTGCGGTTTTGCCACCACTGATTTGAGCGTCAGATTTCTGTGATGCT  
TGTCAGGGGGGCGGAGCCTATGGAAAAACGGCTTTGCCGCGGCCCTCTCACT  
TCCCTGTTAAGTATCTTCTGGCATCTTCCAGGAAATCTCCGCCCCCGTTCTGTA  
AGCCATTTCCGCTCGCCGACGTCGAACGACCGAGCGTAGCGAGTCAGTGAGC  
GAGGAAGCGGAATATATCCTGTATCACATATTCTGCTGACGCACCGGTGCAG  
CCTTTTTTCTCCTGCCACATGAAGCACTTCACTGACACCCTCATCAGTGCCAA  
CATAGTAAGCCAGTATACTACTCCGCTAGCgctgatgtccggcggtgcttttgccgttacgcaccacc  
ccgtcagtagctgaacaggaggagcagctgatagaacagaagccactggagcacctcaaaaacacatcataactaaatca  
gtaagtggcagcatcaccgacgcactttgcgccgaataaatactgtgacggaagatcacttcggtgacttaactgcttggg  
atccagacctggtaccagcgeccaatacgaaccgcctctccccgcgcttgccgattcattaatgcagctggcagcagag  
gttcccgactggaagcgggagcagtgagcgaacgcaattaatgtgagttagctcactcattaggaacccaggcTTTACA  
CTTTATGCTTCCGGCTCGTATGTTGgtggaattgtgagcgctcgagacaatttcaTATCCCTccg  
caaATGTCCCCTATACTAGGTTATTGGAAAATTAAGGGCCTTGTGCAACCCACT  
CGACTTCTTTTGAATATCTTGAAGAAAATATGAAGAGCATTGTATGAGC

GCGATGAAGGTGATAAATGGCGAAACAAAAAGTTTGAATTGGGTTTGGAGTT  
 TCCCAATCTTCCTTATTATATTGATGGTGTGTTAAATTAACACAGTCTATGG  
 CCATCATAACGTTATATAGCTGACAAGCACAACATGTTGGGTGGTTGTCCAAA  
 GGAGCGTGCAGAGATTTCAATGCTTGAAGGAGCGGTTTTGGATATTAGATAC  
 GGTGTTTTCGAGAATTGCATATAGTAAAGACTTTGAAACTCTCAAAGTTGATTT  
 TCTTAGCAAGCTACCTGAAATGCTGAAAATGTTCTGAAGATCGTTTATGTCATA  
 AACATATTTAAATGGTGTATCATGTAACCCATCCTGACTTCATGTTGTATGAC  
 GCTCTTGATGTTGTTTTATACATGGACCCAATGTGCCTGGATGCGTTCCCAA  
 ATTAGTTTGTTTTAAAAACGTATTGAAGCTATCCCAAAATGATAAGTACT  
 TGAAATCCAGCAAGTATATAGCATGGCCTTTGCAGGGCTGGCAAGCCACGTT  
 TGGTGGTGGCGACCATCCTCCAAAAGGCTCGGGCGAAAACCTGTACTTCCAA  
 GGCGGCTCGGGCTAGGCTGACCAACTGACAGAAGAGCAGATTGCAGAGTTCA  
 AAGAAGCCTTCTCATTATTCGACAAGGATGGGGACGGCACCATCACCACAAA  
 GGAAGTTGGCACCGTTATGAGGTCGCTTGGACAAAACCCAACGGAAGCAGAA  
 TTGCAGGATATGATCAATGAAGTCGATGCTGATGGCAATGGAACGATTGACT  
 TTCCTGAATTTCTTACTATGATGGCTAGAAAAATGAAGGACACAGACAGCGA  
 AGAGGAAATCCGAGAAGCATTCCGTGTTTTTGGACAAGGATGGGAACGGCTAC  
 ATCAGCGCTGCTGAATTACGTCACGTCATGACAAACCTCGGGGAGAAGTTAA  
 CAGACGAAGAAGTTGACGAAATGATAAGGGAAGCAGATATTGATGGTGACG  
 GCCAAGTAAACTACGAAGAGTTTGTACAAATGATGACAGCAAAATGGAGCC  
 ACCCGCAGTTCGAAAAATAAgcttaattagctgacctactagtcggccggcgatgagagaagatttcagc  
 ctgatacagattaatcagaacgcagaagcggctctgataaacagaattgcctggcggcagtagcgcggtgtccacctgac  
 cccatgccgaactcagaagtgaacgcgtagcgcggatggtagtgtgaggcctccatgcgagagtagggaactgccaggc  
 atCAAATAAAACGAAAGGCTCAGTCGAAAGACTGGGCCTTTCGTTTTATctgtgttt  
 gtcggtgaacgatctgctttcttcgcaatgagctc

**pRSF\_D11-riboX-G9**

| Sequence feature           | Nucleotide position |
|----------------------------|---------------------|
| Tac promoter               | 193 - 220           |
| 16S rRNA                   | 504 - 2071          |
| 23S rRNA                   | 2486 - 5389         |
| KanR antibiotic resistance | 6769 - 7584         |
| pRSF replication origin    | 7692 - 8443         |

gtttgacagcttatcatcgactgcacggtgcaccaatgcttctggcgtcaggcagccatcggaagctgtggtatggctgtgcagg  
 tcgtaaatcactgcataatcgtgctcctcaagcgcactcccgttctggataatgtttttgcgccgacataaacggttctggca  
 aatattctgaaatgagctgTTGACAATTAATCATCCGGCTCGTATAAtgtgtggaattgtgagcggata  
 acaatttcacacaggaaacagcgcgctgagaaaaagcgaagcggcactgctcttaacaatttatcagacaatctgtgtgggca  
 ctcgaggccgctgagaaaaagcgaagcggcactgctcttaacaatttatcagacaatctgtgtggcactcgaagatacggatt  
 cttacgtcgaagacgaaaaatgaataccaagtctcaagagtgaaacacgtaattcattacgaagttaattctttgagcgtcaaac  
 ttttAAATTGAAGAGTTTGTATCATGGCTCAGATTGAACGCTGGCGGCAGGCCTA  
 ACACATGCAAGTCGAACGGTAACAGGAAGAAGCTTGCTTCTTTGCTGACGAG  
 TGCGGACGGGTGAGTAATGTCTGGGAAACTGCCTGATGGAGGGGGATAACT  
 ACTGGAAACGGTAGCTAATACCGCATAACGTCGCAAGACCAAAGAGGGGGA

CCTTCGGGCCTCTTGCCATCGGATGTGCCAGATGGGATTAGCTAGTAGGTGG  
GGTAACGGCTCACCTAGGCGACGATCCCTAGCTGGTCTGAGAGGATGACCAG  
CCACACTGGAAGTGGAGACACGGTCCAGACTCCTACGGGAGGCAGCAGTGGG  
GAATATTGCACAATGGGCGCAAGCCTGATGCAGCCATGCCGCGTGTATGAAG  
AAGGCCTTCGGGTTGTAAAGTACTTTCAGCGGGGAGGAAGGGAGTAAAGTTA  
ATACCTTTGCTCATTGACGTTACCCGCAGAAGAAGCACCGGCTAACTCCGTG  
CCAGCAGCCGCGGGAAAACGGAGGGTGCAAGCGTTAATCGGAATTACTGGG  
CGTAAAGCGCACGCAGGCGGTTTTGTTAAGTCAGATGTGAAATCCCCGGGCTC  
AACCTGGGAAGTGCATCTGATACTGGCAAGCTTGAGTCTCGTAGAGGGGGGT  
AGAATTCCAGGTGTAGCGGTGAAATGCGTAGAGATCTGGAGGAATACCGGTG  
GCGAAGGCGGCCCCCTGGACGAAGACTGACGCTCAGGTGCGAAAGCGTGGG  
GAGCAAACAGGATTAGATACCCTGGTAGTCCACGCCGTAACGATGTCGACT  
TGGAGGTTGTGCCCTTGAGGCGTGGCTTCCGGAGCTAACGCGTTAAGTCGAC  
CGCTGGGGAGTACGGCCGCAAGGTTAAAACCTCAAATGAATTGACGGGGGCC  
CGCACAAAGCGGTGGAGCATGTGGTTTAAATTCGATGCAACGCGAAGAACCTTA  
CCTGGTCTTGACATCCACGGAAGTTTTTCAGAGATGAGAATGTGCCCTTCGGGA  
ACCGTGAGACAGGTGCTGCATGGCTGTCGTCAGCTCGTGTGTGAAATGTTG  
GGTTAAGTCCCACAACGAGCGCAACCCTTATCCTTTGTTGCCAGCGGTCCGGC  
CGGGAAGTCAAAGGAGACTGCCAGTGATAAACTGGAGGAAGGTGGGGATGA  
CGTCGGGTCATCATGGCCCTTACGACCAGGGCTACACACGTGCTACAATGGC  
GCATACAAAGAGAAGCGACCTCGCGAGAGCAAGCGGACCTCATAAAGTGCG  
TCGTAGTCCGGATTGGAGTCTGCAACTCGACTCCATGAAGTCGGAATCGCTA  
GTAATCGTGGATCAGAATGCCACGGTGAATACGTTCCCGGGCCTTGTACACA  
CCGCCCCGTACACCATGGGAGTGGGTTGCAAAAAGAAGTAGGTAGCTTAACCT  
TCGGGAGGGCGCTTACCACTTTGTGATTCATGACTGGGGTGAAGTCGTAACA  
AGGTAACCGTAGGGGAACCTGCGGTTGGATCAAGTGGTTACCTTAAAGAAGC  
GTACTTTGTAGTGCtcacacagattgtctgatagaaagtgaaaagcaaggcgtttacgcgttgggagtgaggctga  
agagaataaggccgttcgctttctattaatgaaagtcaccctacagaaaatatcagcaacgcgtgataagcaatttctgttcc  
ccttcgtctagaggcccaggacaccgcctttcacggcggtaacaggggttcgaatcccctaggggacgccacttctgtgttct  
gagtgaagtcgccaccttaatatctcaaaactcatcttcgggtgatgtttgagattttgctctttaaacttgatcaagctgaa  
aattgaaactgaacaacgagagttgttcgtgagttctcaatttgcacaacgatgatgaatcgaagaacatcttcgggtt  
gtgaGGTTAAGCGACTAAGCGTACACGGTGGATGCCCTGGCAGTCAGAGGCGA  
TGAAGGACGTGCTAATCTGCGATAAGCGTTCGGTAAGGTGATATGAACCGTTA  
TAACCGGCGATTTCCGAATGGGGAAACCCAGTGTGTTTTCGACACACTATCATT  
AACTGAATCCATAGGTTAATGAGGCGAACCGGGGGAAGTGAACATCTAAGT  
ACCCCGAGGAAAAGAAATCAACCGAGATTCCCCAGTAGCGGCGAGCGAAC  
GGGAGCAGCCCAGAGCCTGAATCAGTGTGTGTGTTAGTGGAAGCGTCTGGA  
AAGGCGCGGATAACAGGGTGACAGCCCCGTACACAAAATGCACATGCTGT  
GAGCTCGATGAGTAGGGCGGGACACGTGGTATCCTGTCTGAATATGGGGGGA  
CCATCCTCCAAGGCTAAATACTCCTGACTGACCGATAGTGAACCAGTACCGT  
GAGGGAAAGGCGAAAAGAACCCCGGCGAGGGGAGTGAAAAAGAACCTGAA  
ACCGTGTACGTACAAGCAGTGGGAGCACGCTTAGGCGTGTGACTGCGTACCT  
TTTGTATAATGGGTCAGCGACTTATATTCTGTAGCAAGGTTAACCGAATAGGG  
GAGCCGAAGGGAAACCGAGTCTTAACTGGGCGTTAAGTTGCAGGGTATAGAC  
CCGAAACCCGGTGATCTAGCCATGGGCAGGTTGAAGGTTGGGTAACACTAAC  
TGGAGGACCGAACCGACTAATGTTGAAAATTAGCGGATGACTTGTGGCTGG

GGGTGAAAGGCCAATCAAACCGGGAGATAGCTGGTTCTCCCCGAAAGCTATT  
TAGGTAGCGCCTCGTGAATTCATCTCCGGGGGTAGAGCACTGTTTCGGCAAG  
GGGTCATCCCGACTTACCAACCCGATGCAAACCTGCGAATACCGGAGAATGT  
TATCACGGGAGACACACGGCGGGTGCTAACGTCCGTCGTGAAGAGGGAAAC  
AACCCAGACCCGCCAGCTAAGGTCCCAAAGTCATGGTTAAGTGGGAAACGATG  
TGGGAAGGCCCAGACAGCCAGGATGTTGGCTTAGAAGCAGCCATCATTAAA  
GAAAGCGTAATAGCTCACTGGTTCGAGTCGGCCTGCGCGGAAGATGTAACGGG  
GCTAAACCATGCACCGAAGCTGCGGCAGCGACGCTTATGCGTGTGGGTAG  
GGGAGCGTTCTGTAAGCCTGCGAAGGTGTGCTGTGAGGCATGCTGGAGGTAT  
CAGAAGTGCGAATGCTGACATAAGTAACGATAAAGCGGGTGAAAAGCCCGC  
TCGCCGAAGACCAAGGGTTCCTGTCCAACGTTAATCGGGGCAGGGTGAGTC  
GACCCCTAAGGCGAGGCCGAAAGGCGTAGTCGATGGGAAACAGGTTAATATT  
CCTGTACTTGGTGTACTGCGAAGGGGGGACGGAGAAGGCTATGTTGGCCGG  
GCGACGGTTGTCCCGGTTTAAGCGTGTAGGCTGGTTTTCCAGGCAAATCCGG  
AAAATCAAGGCTGAGGCGTGATGACGAGGCACTACGGTGTGAAGCAACAA  
ATGCCCTGCTTCCAGGAAAAGCCTCTAAGCATCAGGTAACATCAAATCGTAC  
CCCAAACCGACACAGGTGGTCAGGTAGAGAATACCAAGGCGCTTGAGAGAA  
CTCGGGTGAAGGAAGTGGCAAAATGGTGCCGTAACCTCGGGAGAAGGCAC  
GCTGATATGTAGGTGAGGTCCCTCGCGGATGGAGCTGAAATCAGTCGAAGAT  
ACCAGCTGGCTGCAACTGTTTATTA AAAACACAGCACTGTGCAAACACGAAA  
GTGGACGTATACGGTGTGACGCTGCCCGGTGCCGGAAGGTTAATTGATGGG  
GTTAGCGCAAGCGAAGCTCTTGATCGAAGCCCCGGTAAACGGCGGCCGTAAC  
TATAACGGTCCTAAGGTAGCGAAATTCCTTGTCCGGTAAGTTCCGACCTGCAC  
GAATGGCGTAATGATGGCCAGGCTGTCTCCACCCGAGACTCAGTGAAATTGA  
ACTCGCTGTGAAGATGCAGTGTACCCGCGGCAAGACGGAAGACCCCGTGA  
ACCTTTACTATAGCTTGACACTGAACATTGAGCCTTGATGTGTAGGATAGGTG  
GGAGGCTTTGAAGTGTGGACGCCAGTCTGCATGGAGCCGACCTTGAAATACC  
ACCCTTTAATGTTTGTGTTCTAACGTTGACCCGTAATCCGGGTTGCGGACAG  
TGCTGGTGGGTAGTTTACTGGGGCGGTCTCCTCCTAAAGAGTAACGGAGG  
AGCACGAAGGTTGGCTAATCCTGGTCCGACATCAGGAGGTTAGTGCAATGGC  
ATAAGCCAGCTTACTGCGAGCGTGACGGCGCGAGCAGGTGCGAAAGCAGG  
TCATAGTGATCCGGTGGTTCTGAATGGAAGGGCCATCGCTCAACGGATAAAA  
GGTACTCCGGGGATAACAGGCTGATACCGCCCAAGAGTTCATATCGACGGCG  
GTGTTTGGCACCTCGATGTCGGCTCATCACATCCTGGGGCTGAAGTAGGTCCC  
AAGGGTATGGCTGTTTCGCCATTTAAAGTGGTACGCGAGCTGGGTTTAGAACG  
TCGTGAGACAGTTCGGTCCCTATCTGCCGTGGGCGCTGGAGAACTGAGGGGG  
GCTGCTCCTAGTACGAGAGGACCGGAGTGGACGCATCACTGGTGTTCGGGTT  
GTCATGCCAATGGCACTGCCCGGTAGCTAAATGCGGAAGAGATAAGTGCTGA  
AAGCATCTAAGCACGAAACTTGCCCCGAGATGAGTTCTCCCTGACCCTTAA  
GGGTCCTGAAGGAACGTTGAAGACGACGACGTTGATAGGCCGGGTGTGTAAG  
CGCAGCGATGCGTTGAGCTAACCGGTAATAATGAACCGTGAGGCTTAACCTTa  
caacgccgaagctgtttggcggatgagagaagatttcagcctgatacagattaatcagaacgcagaagcggctctgataaac  
agaatttgcctggcggcagtagcgcgggtggtcccactgaccccatgccgaactcagaagtgaacgccgtagcgcgatggt  
agtgtggggtctccccatgcgagtagggaaactgccaggcatcaataaaacgaaaggctcagtcgaaagactgggccttc  
gtttatctgtgtttgtcggatgaacgctctcctgagtaggacaaatccgccgggagcggattgaacgtgcaagcaacggccc  
ggagggtggcgggcaggacgcccgcataaactgccaggcatcaaattaagcagaaggccatcctgacggatggccttttg



cgtttctacaaactcttctctgctgcatatctacaagccatccccccacagatacggtaaactagcctcgTTTTgcatcaggaaagc  
agctatgaaccactccttaaaacctggaacacatttggcattgatcataatgctcagcacattgtatgtccgaagacgaacaac  
aattactcaatgcttggcagtagtgaaccgcagaaggacaaccggtcttattctgggtgaaggaagtaagtactTTTTctggagg  
actatcgcgccacggtagatcaaccggatcaaaggtagaaattcatgatgaacctgatgcgtggatTTacatgtaggagcc  
ggagaaaactggcatcgtctggtaaaatacactttgcaggaaggtagcctggctggaaaatctggcattaattcctggtgtgct  
ggctcatcacctatccagaatattggcttatggcgtagaattacagcgagtttgcgcttatgttgattctgtgaactggcgacag  
gcaagcaagtgcgcttaactgcaaaagagtgcgcttttggctatcgcgacagtatTTTTaaacatgaataccaggaccgcttgcct  
attgtagccgtaggtctgctgctgcaaaaagagtggcaacctgtactaacgtatggtagcttaactcgtctgggatccggtaccga  
attcgggctctaaacgggtcttgggggtttttgctgaaacctcaggcatttgagaagcacacggtcacactgcttccggtagtc  
aataaacgggtaaaccagcaatagacataagcggctatTTaacgacctgcctgaaccgacgacaagctgacgaccgggtct  
ccgcaagtggcacttttggggaaatgtgcgcggaaccttattgtttattttctaaatacattcaaatatgtatccgctcatgaatt  
aattcTTAGAAAACTCATCGAGCATCAAATGAAACTGCAATTTATTCATATCAG  
GATTATCAATACCATATTTTTGAAAAAGCCGTTTCTGTAATGAAGGAGAAAA  
CTCACCGAGGCAGTTCCATAGGATGGCAAGATCCTGGTATCGGTCTGCGATT  
CCGACTCGTCCAACATCAATACAACCTATTAATTTCCCCTCGTCAAAAATAAG  
GTTATCAAGTGAGAAATCACCATGAGTGACGACTGAATCCGGTGAGAATGGC  
AAAAGTTTATGCATTTCTTTCCAGACTTGTTCAACAGGCCAGCCATTACGCTC  
GTCATCAAAATCACTCGCATCAACCAAACCGTTATTCATTTCGTGATTGCGCCT  
GAGCGAGACGAAATACGCGGTCGCTGTTAAAAGGACAATTACAAACAGGAA  
TCGAATGCAACCGGCGCAGGAACACTGCCAGCGCATCAACAATATTTTCACC  
TGAATCAGGATATTCTTCTAATACCTGGAATGCTGTTTTCCCGGGGATCGCAG  
TGGTGAGTAACCATGCATCATCAGGAGTACGGATAAAATGCTTGATGGTCGG  
AAGAGGCATAAATTCCGTCAGCCAGTTTAGTCTGACCATCTCATCTGTAACAT  
CATTGGCAACGCTACCTTTGCCATGTTTCAGAAACAACCTCTGGCGCATCGGGC  
TTCCCATACAATCGATAGATTGTCGCACCTGATTGCCCGACATTATCGCGAGC  
CCATTTATACCCATATAAATCAGCATCCATGTTGGAATTTAATCGCGGCCTAG  
AGCAAGACGTTTCCCGTTGAATATGGCTCATactcttcttttcaatattatgaagcatttatcaggg  
ttattgtctcatgagcggatacatatttgaatgtatttagaaaaataacaaataggcatgcagcgtCTTCCGCTTCCCTC  
GCTCACTGACTCGCTACGCTCGGTCGTTTCGACTGCGGCGAGCGGTGTCAGCTC  
ACTCAAAAGCGGTAATACGGTTATCCACAGAATCAGGGGATAAAGCCGGAA  
AGAACATGTGAGCAAAAAGCAAAGCACCGGAAGAAGCCAACGCCGCAGGCG  
TTTTTCCATAGGCTCCGCCCCCTGACGAGCATCACAAAAATCGACGCTCAA  
GCCAGAGGTGGCGAAACCCGACAGGACTATAAAGATAACCAGGCGTTTCCCC  
TGGAAGCTCCCTCGTGCGCTCTCCTGTTCCGACCCTGCCGCTTACCGGATACC  
TGTCCGCCTTTCTCCCTTCGGGAAGCGTGCGCTTTCTCATAGCTCACGCTGTT  
GGTATCTCAGTTCGGTGTAGGTCGTTCCGCTCCAAGCTGGGCTGTGTGCACGAA  
CCCCCGTTCAGCCCGACCGCTGCGCCTTATCCGGTAACTATCGTCTTGAGTC  
CAACCCGGTAAGACACGACTTATCGCCACTGGCAGCAGCCATTGGTAACTGA  
TTTAGAGGACTTTGTCTTGAAGTTATGCACCTGTTAAGGCTAAACTGAAAGAA  
CAGATTTTGGTGAGTGCGGTCCTCCAACCCACTTACCTTGGTTCAAAGAGTTG  
GTAGCTCAGCGAACCTTGAGAAAACCACCGTTGGTAGCGGTGGTTTTTTCTTTA  
TTTATGAGATGATGAATCAATCGGTCTATCAAGTCAACGAACAGCTATTCGCT  
TACcatatggtgcactctcagtacaatctgctctgatgccgatagttaagccagtatacactccgctatcgtacgtgactggg  
tcatggtgcgccccgacaccgccaacaccgctgacgcgacctgacgggcttgtctgctcccggcatccgcttacagacaa  
gctgtgacctctccggagctgcatgtgtcagaggtttaccgtcatcaccgaaacgcgagggcagcagatcaattcgcgc  
gcaaggcgaagcggcatgattacgttgacaccatcgaatggtgcaaacctttcgcggtatggcatgatagcggccgaa

gagagtcaattcagggtggtgaatgtgaaaccagtaacgttatacgatgtcgcagagtatgccggtgtctttatcagaccgtttcc  
cgcggtggtgaaccaggccagccacgtttctgcgaaaacgcgggaaaaagtgggaagcggcgcgatggcgggagctgaattacattc  
ccaaccgcgtggcacaacaactggcgggcaaacagtcgttgctgattggcgttgccacctccagtctggccctgcacgcgccg  
tcgcaaattgtcgcggcgattaaatctcgcgccgatcaactgggtgccagcgtggtggtgctgatggtagaacgaagcggcgtc  
gaagcctgtaaageggcggtgcacaatcttctcgcgcaacgcgtcagtgggctgatcattaactatccgctggatgaccaggat  
gccattgctgtggaagctgcctgcactaatgtccggcgttatttcttgatgtctctgaccagacacccatcaacagtatttttctcc  
catgaagacggtagcgcgactggcggtggagcatctggtcgcattgggtcaccagcaaatecgcgtgttagcgggcccattaag  
ttctgtctcggcgcgtctcgtctggctggctggcataaatatctcactcgaatcaaattcagccgatagcgggaacgggaaggc  
gactggagtgccatgtccggtttcaaaaaccatgcaaatgctgaatgagggcatcgttccactgcgatgctggttccaacg  
atcagatggcgtggcgcaatgcgcgccattaccgagtcgggctgcgcgttggtcggatatctcggtagtgggatacgac  
gataccgaagacagctcatgttatatcccgcctcaaccaccatcaaacaggattttcgcctgctggggcaaacagcgtggac  
cgcttgctgcaactctcagggccaggcgtgaagggcaatcagctgttcccgtctcactggtgaaaagaaaaaccacctg  
gcgccaatacgaaccgcctctcccgcgcgttgccgattcattaatgcagctggcacgacaggttcccgactggaaagc  
gggcagtgagcgaacgcaattaatgtgagttagcgcgaattgatctg

## Data availability statement

Source data for all figures are available from the corresponding author upon reasonable request.

## References

- 1 Potter, S. C. *et al.* HMMER web server: 2018 update. *Nucleic Acids Res.* **46**, W200--W204, doi:10.1093/nar/gky448 (2018).
- 2 Consortium, T. U. UniProt: a worldwide hub of protein knowledge. *Nucleic Acids Res.* **47**, D506--D515, doi:10.1093/nar/gky1049 (2018).
- 3 Bellaousov, S., Reuter, J. S., Seetin, M. G. & Mathews, D. H. RNAstructure: web servers for RNA secondary structure prediction and analysis. *Nucleic Acids Res.* **41**, W471--W474, doi:10.1093/nar/gkt290 (2013).
- 4 Salis, H. M., Mirsky, E. A. & Voigt, C. A. Automated design of synthetic ribosome binding sites to control protein expression. *Nat. Biotechnol.* **27**, 946--950, doi:10.1038/nbt.1568 (2009).
- 5 Salis, H. M. Chapter two - The Ribosome Binding Site Calculator. *Methods Enzymol.* **498**, 19--42, doi:10.1016/b978-0-12-385120-8.00002-4 (2011).
- 6 Espah Borujeni, A., Channarasappa, A. S. & Salis, H. M. Translation rate is controlled by coupled trade-offs between site accessibility, selective RNA unfolding and sliding at upstream standby sites. *Nucleic Acids Res.* **42**, 2646--2659, doi:10.1093/nar/gkt1139 (2013).
- 7 Espah Borujeni, A. & Salis, H. M. Translation Initiation is Controlled by RNA Folding Kinetics via a Ribosome Drafting Mechanism. *J. Am. Chem. Soc.* **138**, 7016--7023, doi:10.1021/jacs.6b01453 (2016).
- 8 Espah Borujeni, A. *et al.* Precise quantification of translation inhibition by mRNA structures that overlap with the ribosomal footprint in N-terminal coding sequences. *Nucleic Acids Res.* **45**, 5437--5448, doi:10.1093/nar/gkx061 (2017).
- 9 Keseler, I. M. *et al.* The EcoCyc database: reflecting new knowledge about Escherichia coli K-12. *Nucleic Acids Res.* **45**, D543--D550, doi:10.1093/nar/gkw1003 (2016).
- 10 Willis, J. C. W. & Chin, J. W. Mutually orthogonal pyrrolysyl-tRNA synthetase/tRNA pairs. *Nature Chemistry* **10**, 831-837, doi:10.1038/s41557-018-0052-5 (2018).
- 11 Borrel, G. *et al.* Unique Characteristics of the Pyrrolysine System in the 7th Order of Methanogens: Implications for the Evolution of a Genetic Code Expansion Cassette. *Archaea* **2014**, 11, doi:10.1155/2014/374146 (2014).
- 12 Krzycki, J. A. The direct genetic encoding of pyrrolysine. *Curr. Opin. Microbiol.* **8**, 706--712, doi:10.1016/j.mib.2005.10.009 (2005).

- 13 Herring, S. *et al.* The amino-terminal domain of pyrrolysyl-tRNA synthetase is dispensable in vitro but required for in vivo activity. *FEBS Lett.* **581**, 3197--3203, doi:10.1016/j.febslet.2007.06.004 (2007).
- 14 Gaston, M. A., Jiang, R. & Krzycki, J. A. Functional context, biosynthesis, and genetic encoding of pyrrolysine. *Curr. Opin. Microbiol.* **14**, 342-349, doi:10.1016/j.mib.2011.04.001 (2011).
- 15 Srinivasan, G., James, C. M. & Krzycki, J. A. Pyrrolysine Encoded by UAG in Archaea: Charging of a UAG-Decoding Specialized tRNA. *Science* **296**, 1459--1462, doi:10.1126/science.1069588 (2002).
